# Supplementary material for: Functional Characterization of Circadian Nuclear Receptors REV-ERBα and REV-ERBβ in Human Osteosarcoma Cell Cultures
Source: Preprints.org preprint supplement (doi:10.20944/preprints202312.0438.v1), 2023-12-07
Supplement: Supplementary file 1 [file Table S1.xlsx]

## Sheet: Table S1
Table S1. Full list of differentially expressed genes (DEGs) related to Figures 2-5
ENSG ID	Gene Symbol	NDKO/WT FC	NDKO/WT P	N1KO/WT FC	N1KO/WT P	N2KO/WT FC	N2KO/WT P
ENSG00000001461.17	NIPAL3	1.88253	0.000232425	1.10819	0.214165	0.871097	0.0846507
ENSG00000001617.12	SEMA3F	0.245524	8.08053e-07	1.01693	0.722995	0.775754	0.0059999
ENSG00000001631.17	KRIT1	0.613448	0.000199642	0.730764	0.0021159	1.13026	0.0416755
ENSG00000002549.13	LAP3	1.56379	5.53236e-05	1.2316	0.0038165	1.12984	0.0295104
ENSG00000002822.16	MAD1L1	1.65828	8.76976e-06	1.08278	0.213923	0.935575	0.0012109
ENSG00000003249.15	DBNDD1	0.617163	3.72186e-06	0.817959	0.000298043	1.37403	6.32101e-05
ENSG00000003436.16	TFPI	1.53451	0.00481665	0.92201	0.49586	0.85591	0.210041
ENSG00000003756.17	RBM5	0.577752	8.16541e-05	0.973507	0.666816	0.807133	0.00885468
ENSG00000004838.14	ZMYND10	0.578237	0.000185284	0.778396	0.0157692	0.866561	0.2163
ENSG00000005075.16	POLR2J	0.637239	5.65282e-06	0.653869	3.52421e-07	1.10232	0.00215332
ENSG00000005187.12	ACSM3	0.322821	0.00173636	0.521262	0.00868232	0.444011	0.00397315
ENSG00000005238.20	FAM214B	1.71481	4.39567e-07	1.37956	2.03841e-05	0.907704	0.032297
ENSG00000005471.19	ABCB4	0.496868	0.00233671	0.509916	0.00335234	0.994259	0.958552
ENSG00000005483.22	KMT2E	0.625506	0.000189716	0.723526	0.00059109	1.17161	0.00764234
ENSG00000005513.10	SOX8	0.575758	0.000941134	0.606926	0.00161165	1.96364	0.000124613
ENSG00000006016.12	CRLF1	0.331806	0.00260374	0.585422	0.0205549	1.37348	0.0402855
ENSG00000006047.13	YBX2	0.626826	0.000560271	0.768781	0.00415328	1.37874	0.00728228
ENSG00000006062.18	MAP3K14	2.36314	3.51128e-08	1.63974	9.83649e-06	1.00235	0.960506
ENSG00000006210.7	CX3CL1	0.447926	6.94262e-06	0.675022	0.000163169	0.949567	0.559929
ENSG00000006283.18	CACNA1G	0.521569	1.521e-05	0.639216	0.000697742	0.852288	0.0387473
ENSG00000006327.14	TNFRSF12A	2.31719	8.01064e-06	1.93032	0.000129842	1.30579	5.12185e-05
ENSG00000006453.14	BAIAP2L1	0.531404	1.73703e-05	0.612044	0.000167314	1.26931	0.00109954
ENSG00000006606.9	CCL26	3.3069	2.16537e-06	1.03675	0.815465	0.987255	0.930742
ENSG00000006611.17	USH1C	2.90308	0.0408963	1.79932	0.0272883	0.572406	0.0358685
ENSG00000006625.18	GGCT	0.607749	2.52643e-05	0.738108	0.000270397	1.04604	0.231048
ENSG00000006634.8	DBF4	0.437968	1.13563e-06	0.69081	4.39012e-05	1.18049	0.0434734
ENSG00000007237.19	GAS7	0.586285	0.00296857	0.785983	0.039382	1.07573	0.520083
ENSG00000007255.10	TRAPPC6A	0.626855	0.00115754	0.902671	0.227252	1.21513	0.0308559
ENSG00000007264.15	MATK	1.92874	0.0303218	0.89486	0.546962	0.811916	0.422559
ENSG00000007968.7	E2F2	0.4317	1.4733e-06	0.60224	2.16064e-06	1.11119	0.0628978
ENSG00000008277.15	ADAM22	0.536842	0.00965802	0.787895	0.144505	1.24158	0.149771
ENSG00000008300.17	CELSR3	0.611966	5.56424e-05	0.920855	0.225392	0.780513	0.0123188
ENSG00000008311.16	AASS	0.567376	1.32815e-05	0.909574	0.114723	1.19504	0.065563
ENSG00000008394.13	MGST1	0.0656359	4.05212e-07	0.996062	0.966461	0.640461	0.000226892
ENSG00000008517.19	IL32	12.3567	1.0251e-08	3.20076	2.13886e-08	1.06669	0.279655
ENSG00000008853.18	RHOBTB2	0.547464	0.000228462	0.662711	0.00162504	0.882965	0.0724753
ENSG00000010318.22	PHF7	0.590048	0.00421602	0.909875	0.491122	0.95255	0.594284
ENSG00000010319.7	SEMA3G	0.582857	0.00141297	0.888571	0.135516	1.14114	0.0926565
ENSG00000010361.14	FUZ	0.471403	1.98386e-05	0.906597	0.0635498	0.868331	0.250083
ENSG00000010818.10	HIVEP2	1.56978	0.000344534	1.28537	0.000715435	0.944844	0.206727
ENSG00000011028.14	MRC2	0.627049	2.68581e-05	0.84372	0.00402458	0.924383	0.0602878
ENSG00000011332.22	DPF1	0.622656	0.00176415	0.684171	0.0160268	0.876219	0.0868977
ENSG00000011638.11	LDAF1	1.63469	0.0065858	1.08367	0.396441	0.843149	0.0287599
ENSG00000012171.20	SEMA3B	0.346801	2.4215e-06	0.790382	0.00349534	1.11526	0.114558
ENSG00000012232.9	EXTL3	0.621518	2.26308e-07	0.569582	3.74771e-07	0.350516	6.0909e-08
ENSG00000012779.12	ALOX5	1.78869	5.79405e-05	0.952736	0.619301	0.874949	0.088904
ENSG00000012822.16	CALCOCO1	1.68317	1.92014e-05	1.1883	0.00788196	0.787777	0.00474582
ENSG00000013364.19	MVP	1.71121	7.33435e-05	1.0871	0.168553	1.0767	0.227713
ENSG00000013561.18	RNF14	1.58778	0.000391622	1.27712	0.0410262	1.36289	0.0159658
ENSG00000014824.14	SLC30A9	0.575846	0.000334352	0.674842	0.000571603	0.812773	0.0389464
ENSG00000015676.18	NUDCD3	0.647534	0.000119649	0.754801	9.12992e-06	0.786726	0.00247951
ENSG00000018236.15	CNTN1	0.490876	0.00018691	0.696168	0.00264345	1.02737	0.862823
ENSG00000018625.15	ATP1A2	2.2069	0.00223016	1.09339	0.533546	0.775862	0.178616
ENSG00000019169.11	MARCO	2.30606	0.000276235	1.63691	0.0163519	0.847383	0.278331
ENSG00000019186.10	CYP24A1	0.515082	0.0189197	0.700411	0.121531	0.886883	0.556119
ENSG00000019549.13	SNAI2	2.23468	5.37634e-06	2.19851	3.25525e-05	0.816676	0.00217731
ENSG00000019995.6	ZRANB1	1.54295	4.61225e-07	1.41189	1.32994e-06	0.78786	0.000692227
ENSG00000020129.16	NCDN	1.53617	5.42319e-05	1.21392	0.00412404	0.917211	0.114051
ENSG00000020181.18	ADGRA2	0.279481	9.60502e-08	0.365495	1.48525e-07	1.0015	0.976923
ENSG00000020577.14	SAMD4A	1.5102	8.94282e-05	1.2603	0.00358457	0.72756	0.00173097
ENSG00000021300.14	PLEKHB1	0.476681	1.01312e-05	1.02242	0.796247	0.524791	0.000366156
ENSG00000021645.20	NRXN3	0.665918	0.00221346	1.43627	0.00072618	1.24986	0.019968
ENSG00000021826.18	CPS1	0.362782	0.000599317	1.07754	0.48503	0.806391	0.157561
ENSG00000022556.16	NLRP2	2.79379	1.16446e-08	2.50236	2.01421e-06	0.157109	4.41965e-08
ENSG00000023171.20	GRAMD1B	1.52647	0.0283777	1.22279	0.107495	1.39559	0.0375685
ENSG00000023445.16	BIRC3	3.66506	0.000134022	1.55318	0.0212332	0.530387	0.0129285
ENSG00000023572.10	GLRX2	1.87541	0.00160903	1.262	0.249116	1.56623	0.0577712
ENSG00000023902.14	PLEKHO1	1.52431	0.00018202	1.19107	0.00843871	1.0896	0.112472
ENSG00000024422.12	EHD2	0.626502	6.32807e-06	0.73348	0.000393562	1.01433	0.665766
ENSG00000024526.17	DEPDC1	0.540245	6.76303e-05	1.00217	0.947332	1.07115	0.0702905
ENSG00000025039.15	RRAGD	1.62336	4.30016e-05	1.19136	0.0884972	1.0771	0.430793
ENSG00000025770.19	NCAPH2	0.651204	1.27936e-05	0.79509	0.000394683	1.17794	0.00338349
ENSG00000025772.8	TOMM34	1.85135	1.0282e-07	1.31248	5.34653e-05	0.963317	0.137689
ENSG00000026103.23	FAS	1.67883	0.000780208	0.973067	0.824014	1.23545	0.0245509
ENSG00000026508.21	CD44	1.50487	0.00235423	0.904137	0.223249	0.897128	0.215024
ENSG00000026751.17	SLAMF7	4.91558	6.37693e-08	1.62338	0.00157025	1.41234	0.0242545
ENSG00000029534.21	ANK1	2.53656	1.19002e-05	0.977273	0.74805	1.12846	0.209254
ENSG00000030419.17	IKZF2	0.631074	0.000738282	0.89982	0.267373	0.896221	0.19937
ENSG00000032219.19	ARID4A	0.510989	0.00107808	0.732732	0.0186325	0.754121	0.0248857
ENSG00000033100.17	CHPF2	1.57047	0.000112237	1.16944	0.0268956	0.913197	0.118648
ENSG00000034152.19	MAP2K3	1.95089	7.2824e-07	1.24256	0.000721147	1.06536	0.153871
ENSG00000037280.16	FLT4	0.596474	0.00796188	0.911525	0.389281	1.06954	0.507949
ENSG00000039139.11	DNAH5	0.494901	0.0251563	0.634461	0.108096	1.04079	0.863199
ENSG00000039523.20	RIPOR1	2.14515	1.06996e-05	1.69847	6.18499e-06	1.38986	8.96586e-05
ENSG00000040487.13	SLC66A1	1.50976	0.000246099	1.19647	0.00504269	1.06783	0.166212
ENSG00000040608.14	RTN4R	0.637765	2.5461e-06	0.674226	1.3813e-06	1.07762	0.0385409
ENSG00000041880.15	PARP3	0.625886	0.000229373	0.840261	0.114246	0.901988	0.0762293
ENSG00000041982.16	TNC	0.328992	0.000411535	1.06338	0.574693	0.413213	0.00128411
ENSG00000042286.15	AIFM2	1.50727	5.95401e-06	1.14212	0.0360953	1.29069	0.000402668
ENSG00000042493.16	CAPG	3.73122	7.55157e-11	1.27541	0.00687681	0.786579	0.000199256
ENSG00000042832.12	TG	2.05786	0.0247646	1.10566	0.527967	0.854088	0.434688
ENSG00000043039.7	BARX2	0.594433	0.0181274	0.659046	0.0392811	1.14513	0.324604
ENSG00000044090.13	CUL7	1.63553	1.55109e-05	1.14215	0.0478964	0.798715	0.0168452
ENSG00000047579.20	DTNBP1	0.631302	0.00593212	0.814029	0.0753448	1.37627	0.0152792
ENSG00000047617.17	ANO2	4.14522	5.51899e-07	1.72797	0.000351858	1.49566	0.00129547
ENSG00000047644.20	WWC3	0.512945	0.00350726	0.868116	0.277338	1.07896	0.518826
ENSG00000048052.24	HDAC9	3.09155	8.83805e-06	1.86211	0.000700023	0.841555	0.20266
ENSG00000048162.22	NOP16	1.79334	8.81874e-05	1.3592	8.01116e-05	1.34461	0.000635745
ENSG00000048392.13	RRM2B	1.62438	4.58395e-05	1.0849	0.184431	1.28614	0.00304
ENSG00000049089.15	COL9A2	0.640473	0.00117976	1.16844	0.0382374	0.766894	0.0142706
ENSG00000049130.16	KITLG	0.659563	0.0053171	0.615385	0.000225891	1.28067	0.000496617
ENSG00000049249.9	TNFRSF9	5.44544	0.000266976	2.28755	0.00600486	0.948652	0.69831
ENSG00000049323.16	LTBP1	0.625969	0.00043066	1.16315	0.0185832	0.445411	2.93612e-05
ENSG00000049860.14	HEXB	2.68506	1.01612e-05	2.18884	1.01375e-06	1.00164	0.965063
ENSG00000050405.14	LIMA1	2.04051	1.38629e-05	1.3547	0.000841685	1.02171	0.645405
ENSG00000051341.15	POLQ	0.557986	1.39312e-05	0.728064	0.00108696	0.852505	0.00175476
ENSG00000051596.10	THOC3	0.649805	0.000192504	1.1376	0.0290411	1.40866	6.69881e-05
ENSG00000051825.15	MPHOSPH9	0.582343	0.008353	0.904599	0.378152	0.888218	0.31112
ENSG00000052344.16	PRSS8	0.629376	0.00412828	0.41933	0.000323883	0.540335	0.00084696
ENSG00000052749.14	RRP12	2.09836	1.145e-05	1.39949	2.07269e-05	1.01615	0.755658
ENSG00000053770.12	AP5M1	0.661219	0.000265423	0.766063	0.000457049	0.769951	0.00168727
ENSG00000053918.18	KCNQ1	2.01869	0.000161203	0.983979	0.889038	1.03738	0.807806
ENSG00000054277.14	OPN3	0.561971	0.000498563	0.751347	0.0123482	0.962279	0.509074
ENSG00000054356.14	PTPRN	1.54821	3.65708e-05	1.19495	0.0137483	0.560553	0.000348402
ENSG00000054654.20	SYNE2	0.435572	1.01234e-06	0.717786	0.000145808	0.788561	0.000125154
ENSG00000055118.17	KCNH2	0.544877	0.0071468	1.279	0.0527509	1.05292	0.634828
ENSG00000056050.7	HPF1	0.608471	0.000433985	0.717403	0.00685446	1.13177	0.0834124
ENSG00000056291.19	NPFFR2	0.589947	6.25807e-05	0.593413	4.66957e-05	0.720565	0.000372281
ENSG00000056487.16	PHF21B	0.621387	0.0335126	0.799264	0.22637	1.02811	0.85694
ENSG00000056558.11	TRAF1	10.0599	1.3983e-07	1.99029	0.00121687	0.859223	0.160419
ENSG00000056736.10	IL17RB	0.499618	0.000483397	0.749427	0.0315874	0.832697	0.0556852
ENSG00000057252.13	SOAT1	1.52435	0.00111228	1.28666	0.00158976	1.03951	0.524865
ENSG00000058085.15	LAMC2	1.577	0.000213223	1.19157	0.0099372	0.432631	2.55787e-05
ENSG00000058091.17	CDK14	0.390002	1.89044e-05	0.570972	0.000424172	0.986599	0.84892
ENSG00000058866.15	DGKG	2.34431	0.0030987	1.31936	0.107928	0.585828	0.0300186
ENSG00000059122.17	FLYWCH1	1.54815	0.000159284	1.37313	0.000906795	0.877057	0.0559565
ENSG00000059378.13	PARP12	1.90942	3.34668e-06	1.16519	0.00225786	1.31206	0.035188
ENSG00000059804.16	SLC2A3	2.1308	2.4347e-05	1.23139	0.0489624	1.28838	0.067303
ENSG00000059915.17	PSD	0.664256	0.0100532	1.0009	0.99141	0.596444	0.00488738
ENSG00000060718.22	COL11A1	0.183416	5.98876e-06	0.594975	0.000505401	1.32154	0.00158129
ENSG00000061656.11	SPAG4	1.68282	0.0167166	1.1556	0.561943	0.590066	0.0101672
ENSG00000061938.21	TNK2	1.60759	0.00034861	1.39253	0.000401383	0.735182	0.000288494
ENSG00000063180.9	CA11	0.612302	0.000161318	0.854992	0.145435	0.688134	0.000251144
ENSG00000063438.20	AHRR	0.467662	0.00801735	0.816542	0.316439	0.93097	0.696377
ENSG00000064042.18	LIMCH1	0.481117	1.00409e-05	0.582938	3.37524e-05	1.2831	0.000305635
ENSG00000064205.11	CCN5	1.88147	0.00101834	0.704183	0.00320259	1.38247	0.0220892
ENSG00000064300.9	NGFR	0.164015	3.58459e-06	0.306977	1.27144e-05	0.736108	0.0256838
ENSG00000064601.21	CTSA	1.74414	2.07272e-06	1.26542	0.000859798	1.03012	0.527004
ENSG00000065325.13	GLP2R	2.46846	0.000874989	1.84791	0.00123831	0.783573	0.181575
ENSG00000065328.17	MCM10	0.524469	1.48741e-06	0.720481	0.000212034	0.841606	9.54798e-05
ENSG00000065357.20	DGKA	1.51618	0.003584	1.26189	0.0585197	1.35085	0.210162
ENSG00000065361.17	ERBB3	0.516093	0.0213241	0.586452	0.0486799	0.891093	0.438641
ENSG00000065491.8	TBC1D22B	1.69704	8.04551e-06	1.41177	6.7316e-07	1.04845	0.178925
ENSG00000065534.20	MYLK	1.55465	0.00046352	0.933751	0.26622	1.10815	0.319125
ENSG00000065618.21	COL17A1	1.70286	0.0197666	1.09831	0.4966	0.757153	0.129235
ENSG00000065717.15	TLE2	0.480359	9.10244e-05	0.781225	0.0121527	0.942184	0.407591
ENSG00000066230.12	SLC9A3	0.560816	6.48697e-05	0.714494	0.00100142	1.31682	0.00140717
ENSG00000066248.15	NGEF	0.613164	0.0249285	0.80562	0.306972	0.896074	0.49217
ENSG00000066468.24	FGFR2	0.588424	0.00103989	1.00911	0.914215	1.10542	0.165265
ENSG00000067066.17	SP100	1.74645	0.00164335	1.08919	0.462892	0.921246	0.469007
ENSG00000067082.15	KLF6	1.61571	2.78703e-06	1.10981	0.0336509	0.829709	0.0085499
ENSG00000067560.14	RHOA	0.640519	1.81079e-06	1.02459	0.250831	0.98678	0.584678
ENSG00000067798.16	NAV3	1.6497	0.00229508	0.880425	0.36536	0.677178	0.018986
ENSG00000067829.20	IDH3G	1.56677	1.79489e-05	1.16926	0.00881448	0.801718	0.00135058
ENSG00000067836.13	ROGDI	0.661556	0.000421549	0.809722	0.00797247	1.09494	0.246771
ENSG00000067840.13	PDZD4	0.329932	1.75286e-06	0.569849	1.97534e-05	1.07386	0.177145
ENSG00000067900.8	ROCK1	0.501245	0.00046666	0.756145	0.0129175	0.836708	0.0715056
ENSG00000068001.14	HYAL2	0.643319	3.5697e-07	0.904911	0.00221692	0.991886	0.753065
ENSG00000068489.13	PRR11	0.634255	0.000617974	1.13587	0.0232852	0.909639	0.0735421
ENSG00000069399.15	BCL3	1.68545	0.00290395	1.13738	0.170619	1.56245	0.00626787
ENSG00000069424.16	KCNAB2	1.58294	0.000414983	1.1531	0.0133226	0.948697	0.16696
ENSG00000069535.14	MAOB	0.642499	0.00233465	0.882353	0.0727284	1.06794	0.330368
ENSG00000070061.16	ELP1	1.51332	0.000535548	1.18734	0.0102286	0.983643	0.831593
ENSG00000070371.16	CLTCL1	1.55561	0.00242492	1.27473	0.0501987	0.649534	0.0209004
ENSG00000070404.10	FSTL3	1.53993	0.000122392	1.24743	0.000866816	1.20092	0.00710221
ENSG00000071246.11	VASH1	0.481217	0.000214399	0.714685	0.00559784	0.682242	0.00277344
ENSG00000071282.12	LMCD1	0.398011	1.71967e-05	1.12378	0.0952686	0.386338	7.0357e-06
ENSG00000071539.14	TRIP13	0.524498	7.00232e-05	0.894243	0.0851434	0.959875	0.446782
ENSG00000071575.12	TRIB2	0.343487	3.81552e-06	0.970056	0.605641	0.586847	0.000244006
ENSG00000071967.12	CYBRD1	1.55961	0.00163665	1.1678	0.17973	0.833445	0.210122
ENSG00000072041.18	SLC6A15	1.50026	0.00434605	1.24829	0.0922387	0.88294	0.522202
ENSG00000072415.10	PALS1	0.655967	0.000284846	0.773037	0.00269093	0.877491	0.0406322
ENSG00000073146.16	MOV10L1	1.72785	0.00228621	0.992405	0.964999	1.90633	0.0001267
ENSG00000073150.14	PANX2	2.86	5.24215e-08	1.15645	0.0485024	1.18226	0.0157309
ENSG00000073350.14	LLGL2	23.1137	8.38394e-07	5.58957	1.42082e-07	1.88341	0.00218924
ENSG00000073536.18	NLE1	1.54679	0.00141034	1.13554	0.0836902	1.2659	0.0239246
ENSG00000073578.18	SDHA	0.324108	1.28465e-07	0.628191	5.62924e-07	1.28757	7.8544e-06
ENSG00000073712.15	FERMT2	0.52294	3.57941e-06	0.793317	0.000673326	0.683631	4.648e-05
ENSG00000074047.22	GLI2	0.506224	2.73288e-07	0.865551	7.01733e-05	0.812134	4.43754e-05
ENSG00000074181.9	NOTCH3	0.350796	5.53164e-06	0.751093	0.000699312	0.865823	0.0492796
ENSG00000074211.14	PPP2R2C	1.67557	1.74615e-05	1.27565	0.00429184	0.910365	0.165464
ENSG00000074370.18	ATP2A3	0.656071	0.0193377	0.902428	0.558992	1.01987	0.856418
ENSG00000074410.14	CA12	0.550889	0.000692154	0.871163	0.146208	0.760905	0.0196802
ENSG00000074416.16	MGLL	3.59018	9.70257e-08	1.57984	6.34015e-06	1.00671	0.904351
ENSG00000074964.17	ARHGEF10L	1.54536	0.000369531	1.00671	0.928867	1.07811	0.298063
ENSG00000075142.14	SRI	0.501128	7.68566e-06	0.562301	1.65243e-05	1.52862	2.90691e-05
ENSG00000075213.11	SEMA3A	0.327142	4.80848e-05	0.358898	0.000191109	1.56141	0.00197455
ENSG00000075218.19	GTSE1	0.567943	5.90824e-07	0.849198	0.000362865	0.901821	0.00906188
ENSG00000075223.14	SEMA3C	0.325154	1.92192e-05	0.588539	0.000573214	0.890613	0.243242
ENSG00000075303.13	SLC25A40	0.490874	0.00705585	0.55915	0.0167508	1.15973	0.305558
ENSG00000075340.23	ADD2	2.79267	0.000144402	3.30324	3.62465e-05	0.336037	0.00091873
ENSG00000075618.18	FSCN1	0.529695	6.54156e-07	0.567675	8.55565e-07	1.10274	0.0125138
ENSG00000075886.11	TUBA3D	0.442768	4.18491e-06	0.611358	0.00562892	1.28749	0.363599
ENSG00000076242.16	MLH1	0.615558	7.77526e-05	0.979952	0.661602	0.953875	0.435211
ENSG00000076513.17	ANKRD13A	1.57135	0.00361965	1.33324	0.0816387	0.9957	0.971129
ENSG00000076716.9	GPC4	0.339983	2.35623e-07	0.771761	0.00131118	0.999406	0.983722
ENSG00000077044.11	DGKD	1.9066	4.10665e-05	1.39752	0.00113852	1.33818	0.00412893
ENSG00000077150.20	NFKB2	2.36434	6.79125e-06	1.39247	0.00159744	0.642248	0.00349393
ENSG00000077274.9	CAPN6	1.73477	0.000879634	2.33284	1.10799e-05	0.432392	0.00013715
ENSG00000077684.16	JADE1	0.592232	5.62444e-06	0.726481	7.53426e-05	1.13978	0.00151773
ENSG00000077942.19	FBLN1	0.425605	1.53236e-05	0.588664	0.00027271	1.06263	0.381183
ENSG00000077984.6	CST7	1.98309	0.000346166	2.17388	0.00022143	0.312585	1.35957e-05
ENSG00000078018.21	MAP2	0.515794	0.0123721	0.947209	0.72903	0.685418	0.117177
ENSG00000078053.17	AMPH	0.604615	0.000167769	0.905415	0.0816939	0.97308	0.440241
ENSG00000078098.15	FAP	2.82394	4.48047e-05	0.94165	0.771856	0.706237	0.0440203
ENSG00000078114.19	NEBL	0.353532	0.00259982	0.537206	0.0137912	0.933438	0.670605
ENSG00000078177.14	N4BP2	0.633924	0.000336347	0.795517	0.00460187	0.913946	0.165813
ENSG00000078269.15	SYNJ2	1.54707	1.73837e-06	1.27909	0.000210397	1.35983	0.000465322
ENSG00000078401.7	EDN1	1.97087	4.39362e-05	1.24018	0.0179025	2.50881	4.09267e-06
ENSG00000078487.18	ZCWPW1	0.56555	0.0158238	0.672249	0.0863113	1.36172	0.0807926
ENSG00000078900.15	TP73	0.531411	3.09197e-05	0.578189	3.94107e-05	1.031	0.53217
ENSG00000079134.13	THOC1	0.564477	8.45494e-06	0.633753	5.04996e-05	1.19873	0.00958701
ENSG00000079263.19	SP140	4.98257	8.06568e-05	1.45667	0.013666	0.559263	0.0236218
ENSG00000079308.20	TNS1	0.59309	1.64184e-05	0.976843	0.657319	0.9309	0.141022
ENSG00000079435.10	LIPE	0.53121	3.94024e-06	0.758571	0.0283429	0.963454	0.560217
ENSG00000079616.14	KIF22	0.620353	9.58175e-07	1.0057	0.818645	0.827848	7.41044e-05
ENSG00000079931.15	MOXD1	2.07217	4.98486e-06	1.6221	9.69389e-05	1.16428	0.093573
ENSG00000080031.10	PTPRH	3.02391	0.000368142	1.40232	0.141565	1.47678	0.0729557
ENSG00000080189.15	SLC35C2	1.59806	1.04033e-07	1.22731	0.000743606	0.894324	0.00940106
ENSG00000080503.24	SMARCA2	0.655258	0.0141308	0.988404	0.911029	1.03017	0.703679
ENSG00000080823.23	MOK	1.73537	2.84908e-05	1.18945	0.158289	0.96211	0.769247
ENSG00000080986.13	NDC80	0.546097	2.80928e-05	0.884361	0.0378472	0.988446	0.782773
ENSG00000081051.8	AFP	2.43375	0.00109755	1.42242	0.0855867	0.906002	0.54123
ENSG00000081052.14	COL4A4	1.5558	0.00610728	1.36639	0.0197442	0.674077	0.00707225
ENSG00000081087.15	OSTM1	1.6227	0.00200111	1.70473	0.0134581	1.3184	0.0925025
ENSG00000081189.16	MEF2C	1.73289	0.000520892	1.49474	0.0195854	0.660526	0.00240393
ENSG00000081377.17	CDC14B	1.66172	0.00289443	1.10102	0.223785	1.06667	0.451232
ENSG00000082014.17	SMARCD3	0.60252	3.3121e-05	0.980087	0.630054	0.856409	0.0141726
ENSG00000082146.13	STRADB	0.530791	0.000631089	0.805877	0.0784425	0.98635	0.863606
ENSG00000082458.12	DLG3	0.663823	0.00165582	0.863901	0.180953	0.890268	0.132358
ENSG00000082497.12	SERTAD4	0.634169	0.00356525	0.98024	0.784511	0.913655	0.331479
ENSG00000083223.18	TUT7	1.60733	2.77721e-05	1.19084	0.191387	1.14656	0.0667469
ENSG00000083290.20	ULK2	1.70166	0.0114889	1.29921	0.0485638	0.958005	0.879656
ENSG00000083444.17	PLOD1	0.544901	1.0869e-06	0.87086	0.00294546	0.782405	0.0001451
ENSG00000083799.18	CYLD	2.01398	4.72938e-05	1.26317	0.00865834	0.901742	0.188531
ENSG00000083807.10	SLC27A5	0.632073	0.0066294	0.652186	0.0125625	1.11933	0.416313
ENSG00000083838.17	ZNF446	0.598144	0.000402705	0.643176	0.00189757	1.45651	0.000239276
ENSG00000083857.15	FAT1	0.544391	1.27974e-06	0.628407	1.76957e-05	1.17889	0.0176018
ENSG00000084710.14	EFR3B	2.72016	1.0527e-06	1.16872	0.0175078	0.908436	0.119559
ENSG00000084764.12	MAPRE3	1.67837	0.000500735	1.4462	0.00334472	0.874285	0.256506
ENSG00000085185.16	BCORL1	0.657549	0.00036256	0.895414	0.170646	1.15715	0.00378503
ENSG00000085231.14	AK6	1.87136	0.000443578	1.39304	0.00214126	1.01838	0.850868
ENSG00000085365.18	SCAMP1	1.50539	0.00188596	1.61435	0.000664129	0.891925	0.281389
ENSG00000085552.18	IGSF9	0.654355	0.00107846	0.895412	0.193573	1.07815	0.359236
ENSG00000085733.16	CTTN	1.55796	5.63373e-06	1.35606	0.000100109	1.0476	0.0926198
ENSG00000085788.14	DDHD2	0.621884	0.0106237	0.937341	0.566122	1.17102	0.0698597
ENSG00000086062.13	B4GALT1	1.70663	1.74986e-08	1.52123	1.30946e-07	0.699937	4.61547e-06
ENSG00000086189.11	DIMT1	1.75036	6.82348e-05	1.67301	0.000116643	0.846188	0.0593868
ENSG00000086205.18	FOLH1	0.626382	0.0139768	0.919676	0.453773	0.731024	0.00968603
ENSG00000086544.3	ITPKC	1.5245	0.00015865	1.17297	0.00433779	0.888789	0.073865
ENSG00000086730.17	LAT2	1.61317	0.000173359	0.974947	0.733164	0.84732	0.0805568
ENSG00000086991.13	NOX4	0.422329	0.00141572	0.711736	0.0343963	0.544955	0.00220615
ENSG00000087074.8	PPP1R15A	1.9384	7.07397e-07	1.19711	0.00120337	1.12841	0.0381257
ENSG00000087076.9	HSD17B14	2.12884	4.93692e-06	1.42173	0.00256401	0.555095	0.000202279
ENSG00000087085.16	ACHE	0.609315	0.000573238	0.609556	0.00112477	1.32239	0.00162406
ENSG00000087299.12	L2HGDH	0.666443	0.00171551	0.801364	0.0352205	0.804047	0.0177677
ENSG00000087301.9	TXNDC16	0.603886	9.4402e-05	0.799784	0.00549653	0.747976	0.00314409
ENSG00000088543.15	C3orf18	0.554212	8.04081e-05	1.02711	0.577686	0.835279	0.00974077
ENSG00000088756.13	ARHGAP28	0.473988	0.00434576	0.671855	0.0570459	1.16256	0.34379
ENSG00000088836.14	SLC4A11	1.78956	0.00243977	1.1191	0.0903578	1.28505	0.0115114
ENSG00000089060.12	SLC8B1	1.78168	1.69059e-06	1.29698	5.20458e-05	0.858206	0.00680537
ENSG00000089127.15	OAS1	2.45916	4.49847e-05	0.99505	0.932312	0.62995	0.000134322
ENSG00000089486.17	CDIP1	1.69982	9.52197e-07	1.28768	0.000261502	1.02194	0.672711
ENSG00000089723.10	OTUB2	0.534435	5.9468e-05	0.865801	0.0641847	1.03778	0.416185
ENSG00000089820.16	ARHGAP4	0.550288	0.00500219	0.481102	0.000170521	0.652787	0.00152026
ENSG00000089847.13	ANKRD24	0.518803	3.51617e-05	0.568688	0.000130134	0.771297	0.0167153
ENSG00000090013.11	BLVRB	1.71095	6.02175e-07	1.14262	0.00199097	0.874632	0.0030532
ENSG00000090097.22	PCBP4	0.645798	4.65126e-08	0.914217	0.00196644	0.852054	0.00146444
ENSG00000090339.9	ICAM1	2.19583	0.00132859	1.01284	0.844035	1.28571	0.0698813
ENSG00000090554.13	FLT3LG	0.588785	0.00141009	0.557632	0.00103394	0.568313	0.001349
ENSG00000090776.6	EFNB1	1.56681	1.53832e-05	1.13566	0.0111792	0.964747	0.375321
ENSG00000091073.20	DTX2	1.78356	7.5076e-06	1.35619	0.000416158	1.16267	0.00206377
ENSG00000091136.15	LAMB1	0.579474	4.46823e-05	0.644533	2.15816e-05	1.36036	0.000566708
ENSG00000091317.8	CMTM6	0.613707	1.7166e-06	1.07225	0.0290518	1.0348	0.409375
ENSG00000091436.17	MAP3K20	0.66104	3.71932e-05	0.987647	0.625123	1.38871	3.1526e-06
ENSG00000091527.17	CDV3	1.98347	2.7204e-06	1.43536	1.09754e-07	0.973425	0.169545
ENSG00000091592.16	NLRP1	6.41649	2.25894e-08	4.42484	1.40269e-06	0.613779	0.0098157
ENSG00000091656.19	ZFHX4	0.594357	4.30789e-05	0.791855	0.00595945	1.40484	0.000759848
ENSG00000091972.18	CD200	0.570635	0.000349521	1	1	0.629365	0.00399436
ENSG00000091986.16	CCDC80	0.404466	0.00118291	0.526222	0.00387351	0.371551	0.000880272
ENSG00000092036.19	HAUS4	0.639684	3.05622e-06	0.861348	0.00040066	0.915044	0.00587121
ENSG00000092051.18	JPH4	0.308923	2.57116e-07	0.88546	0.00800994	0.80031	0.000231291
ENSG00000092096.19	SLC22A17	0.56341	4.24391e-05	0.926264	0.361013	1.05044	0.294312
ENSG00000092445.12	TYRO3	0.619265	0.00396604	0.766951	0.0260499	1.10769	0.219059
ENSG00000092470.12	WDR76	0.467299	1.32104e-05	0.662688	0.000777996	1.345	0.000167285
ENSG00000092621.13	PHGDH	0.564359	5.66267e-08	0.886645	0.00107018	0.912931	0.0224976
ENSG00000092758.18	COL9A3	0.497549	1.14819e-05	0.593954	0.00675389	0.905229	0.392994
ENSG00000092820.19	EZR	1.59751	8.12395e-06	1.51019	2.95345e-05	1.05037	0.264451
ENSG00000092853.14	CLSPN	0.555342	0.000538429	0.757527	0.00678131	1.10035	0.185898
ENSG00000092929.12	UNC13D	0.659365	5.80668e-06	1.11503	0.00405032	1.60985	9.61356e-07
ENSG00000092964.18	DPYSL2	0.644715	6.05658e-06	0.870766	0.00614362	0.673854	6.44576e-05
ENSG00000093009.11	CDC45	0.556713	5.19738e-06	0.682017	3.34248e-05	1.10027	0.0353528
ENSG00000093217.11	XYLB	0.663521	0.00319501	1.15136	0.131736	0.961162	0.687853
ENSG00000095209.12	TMEM38B	2.83545	0.000340471	1.39473	0.0160336	1.03903	0.584959
ENSG00000095383.20	TBC1D2	3.53525	5.83872e-08	1.00158	0.971799	0.992342	0.837103
ENSG00000096060.15	FKBP5	0.440309	0.0341753	0.766757	0.332219	0.41383	0.0352292
ENSG00000099139.14	PCSK5	0.408096	1.37636e-06	0.74143	0.000197478	1.12035	0.154608
ENSG00000099250.18	NRP1	0.461284	0.0007073	0.48741	0.000538015	1.13472	0.268632
ENSG00000099256.19	PRTFDC1	0.516408	0.000715402	0.539762	0.000258518	0.640427	0.00142277
ENSG00000099617.4	EFNA2	0.374105	5.62691e-06	0.731205	0.00214565	0.865752	0.0836392
ENSG00000099622.14	CIRBP	0.488689	4.38265e-05	0.852062	0.0259983	1.01242	0.782523
ENSG00000099812.9	MISP	1.96374	3.81304e-06	1.3522	0.000133184	1.38646	0.000118292
ENSG00000099910.17	KLHL22	0.614297	0.000250709	0.647338	0.00120815	1.0419	0.548368
ENSG00000099968.18	BCL2L13	1.83179	1.07403e-05	1.30964	0.000341598	0.883444	0.27051
ENSG00000099998.19	GGT5	0.320528	0.0198145	0.345757	0.0223394	0.790138	0.399821
ENSG00000100003.18	SEC14L2	0.66482	0.00218622	0.804247	0.0255666	1.39718	0.0122638
ENSG00000100027.17	YPEL1	0.454792	0.0400334	0.766613	0.340956	0.900319	0.68623
ENSG00000100031.19	GGT1	0.548988	0.00530121	0.597912	0.00697978	1.00101	0.992002
ENSG00000100100.13	PIK3IP1	1.85725	1.97142e-05	0.9802	0.788318	0.499717	0.000445165
ENSG00000100105.18	PATZ1	0.50815	2.04671e-07	0.722485	3.00087e-05	1.11103	0.000832757
ENSG00000100106.22	TRIOBP	0.61444	1.42788e-06	0.731226	1.19562e-05	1.15843	0.000356389
ENSG00000100121.14	GGTLC2	0.419825	3.74514e-05	0.540816	0.000260281	1.91166	0.000568941
ENSG00000100147.14	CCDC134	0.632349	2.84147e-06	0.850321	0.00342437	1.15353	0.000889974
ENSG00000100154.15	TTC28	0.527703	0.00494351	0.660377	0.00464622	0.764301	0.0529598
ENSG00000100167.21	SEPTIN3	0.470837	9.09759e-06	0.717413	0.000479718	1.41181	0.000231696
ENSG00000100207.21	TCF20	0.656226	6.62485e-05	0.798395	0.000923694	1.05154	0.100462
ENSG00000100227.19	POLDIP3	0.642681	1.47629e-07	0.866283	2.76784e-05	1.13213	1.28469e-06
ENSG00000100228.14	RAB36	1.54121	0.0001701	1.11524	0.0779985	0.800875	0.00286183
ENSG00000100242.16	SUN2	0.542645	4.79364e-06	0.885643	0.0334504	0.755554	0.000773629
ENSG00000100281.14	HMGXB4	0.6209	0.000120768	0.722854	0.000887376	1.00632	0.886861
ENSG00000100290.3	BIK	5.88699	2.21943e-06	1.80171	0.00119798	1.28927	0.0787861
ENSG00000100292.18	HMOX1	1.75144	2.21263e-06	1.16304	0.0441357	1.06628	0.0731005
ENSG00000100297.16	MCM5	0.665591	0.000220886	0.647706	0.000131884	1.09735	0.063791
ENSG00000100311.17	PDGFB	0.52799	0.000589746	0.6366	0.00443491	1.2851	0.0280853
ENSG00000100314.4	CABP7	0.378747	6.7317e-05	0.923161	0.476558	0.811989	0.0379329
ENSG00000100321.15	SYNGR1	0.578234	4.44314e-05	0.639154	6.97324e-05	1.00581	0.901583
ENSG00000100324.14	TAB1	0.569361	0.000934893	0.578225	0.000741367	0.801794	0.0770999
ENSG00000100336.18	APOL4	0.35592	5.11198e-05	0.810271	0.0496052	0.373752	8.94223e-05
ENSG00000100342.21	APOL1	2.21182	4.76962e-06	0.432696	0.000170178	1.09164	0.402982
ENSG00000100351.17	GRAP2	0.453852	0.0134394	0.594203	0.0587719	1.02098	0.935273
ENSG00000100354.21	TNRC6B	0.646949	0.000907989	0.801467	0.0112459	1.10785	0.145814
ENSG00000100362.13	PVALB	1.92234	0.0151048	1.85427	0.00515213	0.527638	0.0575847
ENSG00000100385.14	IL2RB	0.630687	0.000327579	0.545589	8.434e-05	0.877141	0.055085
ENSG00000100417.12	PMM1	0.589551	1.07369e-05	0.668523	2.39808e-05	1.06579	0.0493011
ENSG00000100439.11	ABHD4	2.13711	1.80801e-05	1.38362	0.00347999	0.843912	0.00843716
ENSG00000100479.13	POLE2	0.629262	0.000625684	0.943336	0.403003	0.856753	0.0637968
ENSG00000100485.12	SOS2	0.661086	9.7152e-05	0.813168	0.00570236	0.804586	0.00208417
ENSG00000100503.26	NIN	0.620356	0.000565998	0.869861	0.0562933	0.89762	0.117232
ENSG00000100526.21	CDKN3	0.617439	3.40174e-05	0.747154	0.00103787	0.805021	0.000849417
ENSG00000100577.19	GSTZ1	0.530654	5.58497e-06	0.550552	3.64815e-06	0.63906	1.38689e-05
ENSG00000100578.18	KIAA0586	0.630958	0.00099108	0.919594	0.31603	0.773583	0.00962041
ENSG00000100625.9	SIX4	0.658374	0.00419472	0.843854	0.074094	0.784441	0.0210772
ENSG00000100714.17	MTHFD1	0.486035	7.56558e-07	0.780057	0.000111618	0.814063	0.000611087
ENSG00000100867.15	DHRS2	0.243748	4.35329e-09	0.731323	1.42565e-05	0.94196	0.0218011
ENSG00000100889.12	PCK2	0.595714	3.08623e-06	0.885963	0.000496339	0.571095	1.00128e-07
ENSG00000100908.14	EMC9	0.623133	0.000100708	0.794092	0.00160657	0.924044	0.174474
ENSG00000100938.19	GMPR2	0.664643	0.000667423	0.923502	0.161469	0.995352	0.918467
ENSG00000100985.7	MMP9	4.05046	2.06457e-08	1.80464	0.000587036	0.467802	0.000324945
ENSG00000101096.20	NFATC2	0.436909	5.42516e-05	0.637224	0.000521895	0.92429	0.27023
ENSG00000101134.12	DOK5	1.69794	0.000264242	1.38883	0.00400987	0.913806	0.38643
ENSG00000101197.13	BIRC7	4.03949	2.96816e-05	1.12553	0.176448	0.877292	0.266073
ENSG00000101265.16	RASSF2	0.593627	1.03954e-06	0.823003	0.000400429	0.867307	0.000307892
ENSG00000101282.9	RSPO4	1.78076	7.06577e-05	1.56319	0.0020091	0.955749	0.647149
ENSG00000101384.12	JAG1	0.477239	1.22251e-05	0.482624	0.000112471	1.67474	7.20783e-06
ENSG00000101412.13	E2F1	0.637345	3.45888e-07	0.818993	7.71807e-05	1.17918	0.00427844
ENSG00000101443.18	WFDC2	0.505061	0.00561559	0.688332	0.0268601	0.576985	0.00453407
ENSG00000101574.15	METTL4	0.591001	0.000810887	0.878821	0.288053	1.19333	0.0305442
ENSG00000101596.17	SMCHD1	0.531035	0.00114824	0.848301	0.0856731	0.9427	0.489773
ENSG00000101624.11	CEP76	0.488895	2.10715e-05	0.771683	0.00576686	1.08398	0.116157
ENSG00000101639.19	CEP192	0.540684	0.000152187	0.749338	0.00178612	1.0376	0.428664
ENSG00000101745.17	ANKRD12	0.49611	0.00135226	0.845498	0.237007	0.848092	0.162436
ENSG00000101752.12	MIB1	0.383481	4.58093e-05	0.718713	0.00168064	0.905679	0.156018
ENSG00000101773.19	RBBP8	0.509469	7.98979e-05	0.674981	0.000308541	0.957506	0.594906
ENSG00000101782.15	RIOK3	1.65123	0.0014861	1.27105	0.118617	0.999352	0.994062
ENSG00000102003.12	SYP	1.76008	0.000109012	1.19958	0.153095	0.704883	0.000477961
ENSG00000102032.13	RENBP	2.97234	1.11093e-05	0.934456	0.652805	0.84546	0.25457
ENSG00000102271.14	KLHL4	0.512403	1.40976e-06	0.644212	0.000606389	0.992704	0.897346
ENSG00000102409.10	BEX4	1.67195	1.2846e-05	1.09959	0.0348992	1.17223	0.00729555
ENSG00000102471.15	NDFIP2	1.60533	6.40897e-05	1.35918	0.000489474	0.572734	0.000250007
ENSG00000102554.14	KLF5	1.54857	0.0157822	1.11752	0.479686	1.20733	0.169319
ENSG00000102760.13	RGCC	0.358266	5.11517e-05	0.839566	0.202906	0.548509	0.000506335
ENSG00000102804.15	TSC22D1	0.656283	8.38262e-05	0.935957	0.192355	0.824722	0.0243659
ENSG00000102854.16	MSLN	1.69875	0.000137973	0.498695	0.000152867	1.10998	0.144918
ENSG00000102879.16	CORO1A	0.495462	0.0130692	0.577992	0.0360641	1.47249	0.0444087
ENSG00000102996.5	MMP15	0.651033	0.000923776	0.787885	0.00928871	0.714546	0.00933284
ENSG00000103034.15	NDRG4	1.66552	0.000651609	0.891892	0.093469	0.966104	0.752346
ENSG00000103042.9	SLC38A7	1.55521	1.00183e-05	1.21532	0.00381655	0.946169	0.310245
ENSG00000103043.15	VAC14	1.6968	6.71033e-06	1.2995	0.000433686	0.785259	0.000899374
ENSG00000103066.13	PLA2G15	1.54733	1.88323e-05	1.21319	0.000828423	0.838352	0.00868074
ENSG00000103145.11	HCFC1R1	0.336656	5.93972e-07	0.566047	6.54783e-05	0.94619	0.186115
ENSG00000103202.13	NME4	0.452327	5.08559e-08	0.479543	2.17844e-08	0.783389	4.35028e-05
ENSG00000103249.18	CLCN7	1.58721	8.45472e-05	1.28852	0.00448666	0.870789	0.0436006
ENSG00000103335.22	PIEZO1	1.8494	3.67385e-07	1.26833	0.000537792	0.988167	0.732965
ENSG00000103355.14	PRSS33	0.35327	0.000189705	0.471292	0.00068046	0.866826	0.246038
ENSG00000103415.12	HMOX2	1.59114	2.69482e-05	1.24217	0.00736604	1.22144	0.00157836
ENSG00000103485.19	QPRT	1.91484	4.03276e-06	1.54194	5.21114e-05	0.789588	0.00295504
ENSG00000103496.15	STX4	1.55501	0.000207821	1.16754	0.0721475	1.07526	0.348493
ENSG00000103540.16	CCP110	0.666505	0.000259804	0.85124	0.0058731	0.93437	0.0883563
ENSG00000103995.14	CEP152	0.469658	0.0275442	0.726923	0.23572	0.740812	0.343425
ENSG00000104081.14	BMF	0.445658	0.000156001	0.736975	0.0281737	0.682231	0.00511076
ENSG00000104147.9	OIP5	0.609848	0.00015439	0.719069	0.00093165	1.07221	0.312552
ENSG00000104164.12	BLOC1S6	0.66499	0.00288197	0.72845	0.0153638	0.758975	0.0123271
ENSG00000104219.13	ZDHHC2	0.605033	0.00274964	0.719454	0.0169344	1.25915	0.0209479
ENSG00000104299.15	INTS9	0.577288	9.5371e-05	0.508129	4.62808e-07	0.398779	4.05731e-06
ENSG00000104332.12	SFRP1	0.499064	1.58884e-06	0.942298	0.22028	1.32204	8.66975e-05
ENSG00000104356.11	POP1	1.75615	0.000122807	1.46511	0.00553008	1.21174	0.0919382
ENSG00000104368.19	PLAT	1.86109	1.01119e-05	1.20553	0.00888533	1.21192	0.0116682
ENSG00000104447.13	TRPS1	0.508934	1.71802e-05	0.71986	0.00398189	0.761758	0.00195022
ENSG00000104450.13	SPAG1	1.56876	0.00220897	1.39797	0.0102151	0.94929	0.604098
ENSG00000104660.19	LEPROTL1	0.494527	0.000302311	0.448452	0.000173957	0.375038	7.39533e-05
ENSG00000104671.8	DCTN6	0.433405	1.93693e-06	0.445215	2.06869e-06	0.305634	6.87697e-07
ENSG00000104856.14	RELB	4.76527	2.11824e-07	1.89286	2.54317e-05	0.826363	0.0269171
ENSG00000104951.16	IL4I1	2.74928	0.000610089	1.1268	0.460422	0.943804	0.727981
ENSG00000104953.20	TLE6	0.488265	0.000974978	0.727551	0.0743367	0.7	0.0230401
ENSG00000104967.8	NOVA2	0.60622	0.000125321	0.752519	0.000935016	0.786465	0.00377284
ENSG00000105048.18	TNNT1	0.552238	1.86321e-05	0.687958	8.63164e-05	1.10861	0.0431703
ENSG00000105146.14	AURKC	0.26979	0.00110614	0.256866	0.000959115	0.761309	0.10434
ENSG00000105220.17	GPI	0.552261	7.38953e-06	1.06017	0.174396	1.24149	0.00160577
ENSG00000105289.15	TJP3	0.42449	0.00790178	0.782507	0.198772	1.38047	0.0805598
ENSG00000105290.13	APLP1	0.480899	4.92449e-05	0.774993	0.0161137	1.39334	0.0023884
ENSG00000105327.18	BBC3	1.71851	1.16589e-05	0.955365	0.443675	1.17753	0.0333592
ENSG00000105499.14	PLA2G4C	12.3697	1.61488e-06	1.55698	0.0445861	0.811966	0.389952
ENSG00000105550.10	FGF21	0.452658	4.52172e-05	0.984219	0.778608	0.357143	1.5793e-05
ENSG00000105559.12	PLEKHA4	0.466939	0.000399888	0.51478	0.000392418	1.12077	0.078722
ENSG00000105605.8	CACNG7	0.422915	0.000212259	0.711759	0.00228995	1.06533	0.135566
ENSG00000105642.16	KCNN1	0.593335	0.000420327	0.812246	0.00219007	0.860742	0.0837794
ENSG00000105668.7	UPK1A	0.641077	0.000116486	0.76229	0.00828576	0.755556	0.0428105
ENSG00000105711.14	SCN1B	1.52323	2.04298e-05	1.39402	0.0112704	1.38892	0.00208817
ENSG00000105767.3	CADM4	0.570032	3.46221e-05	0.693099	0.000213138	1.19606	0.00283785
ENSG00000105793.16	GTPBP10	0.562353	0.00198313	0.66099	0.00624089	1.39507	0.0134636
ENSG00000105808.19	RASA4	0.583104	4.65059e-05	0.668319	8.18061e-05	1.12267	0.0259004
ENSG00000105810.10	CDK6	0.610896	0.000129288	0.638824	0.000401619	1.69749	4.85325e-05
ENSG00000105855.10	ITGB8	0.384511	4.87249e-05	0.749323	0.00741322	1.0603	0.423102
ENSG00000105866.15	SP4	0.483953	0.000551259	0.705116	0.0663495	0.965046	0.683894
ENSG00000105894.12	PTN	0.433457	0.000243349	0.882846	0.179183	0.625326	0.00275264
ENSG00000105968.19	H2AZ2	0.653756	5.51216e-07	0.806455	3.28865e-05	1.03585	0.215166
ENSG00000105976.16	MET	1.89375	0.000409293	1.16987	0.073037	0.843284	0.151329
ENSG00000106003.14	LFNG	1.827	8.62627e-05	1.98544	6.15125e-05	0.462905	0.000920422
ENSG00000106049.9	HIBADH	0.658622	6.69566e-05	0.796102	0.00105086	0.85867	0.00692784
ENSG00000106123.12	EPHB6	0.655383	0.00636296	1.02723	0.81077	1.18949	0.285399
ENSG00000106178.7	CCL24	0.509211	0.000299945	0.70671	0.0490284	0.824941	0.0547974
ENSG00000106246.18	PTCD1	0.475162	0.00144526	0.760019	0.0565549	1.23782	0.0753198
ENSG00000106261.17	ZKSCAN1	0.653594	0.000139833	0.720881	0.000416359	1.32791	0.000131388
ENSG00000106290.16	TAF6	0.601241	4.60398e-06	0.702333	2.66076e-05	1.41485	4.7879e-06
ENSG00000106330.12	MOSPD3	0.489385	1.76512e-07	0.622807	2.87167e-05	1.23223	6.44768e-06
ENSG00000106333.13	PCOLCE	0.0669436	1.43546e-08	0.217418	4.3789e-08	0.77476	0.000338531
ENSG00000106351.13	AGFG2	0.599325	0.000503531	0.568554	0.000645729	1.13529	0.0572148
ENSG00000106571.15	GLI3	0.379194	4.35127e-06	0.649316	0.000110559	0.969426	0.68936
ENSG00000106714.18	CNTNAP3	0.62028	0.00808961	0.706831	0.0231576	0.775986	0.0612427
ENSG00000106772.19	PRUNE2	1.90984	0.00120702	1.49727	0.0490845	0.677596	0.0175978
ENSG00000106991.14	ENG	1.52443	1.79542e-05	1.19723	0.0149666	1.73829	8.09634e-05
ENSG00000107201.11	DDX58	2.30035	4.97309e-05	1.39813	0.00111712	1.03103	0.673173
ENSG00000107281.10	NPDC1	1.55386	0.00329497	1.03873	0.580635	1.15094	0.0703216
ENSG00000107438.9	PDLIM1	2.11315	0.000184183	2.47844	4.46133e-05	1.01721	0.909199
ENSG00000107551.21	RASSF4	0.304575	0.0087585	0.761148	0.316381	0.34936	0.0126762
ENSG00000107679.15	PLEKHA1	1.683	3.67345e-05	1.35209	0.0023685	0.845708	0.0264133
ENSG00000107798.18	LIPA	1.57807	1.02255e-05	1.26369	0.000155462	0.66962	1.81978e-06
ENSG00000107819.14	SFXN3	1.71591	1.16355e-05	1.25525	0.00491656	0.724117	0.000446018
ENSG00000108179.14	PPIF	1.62379	0.000267175	1.43029	6.95931e-05	0.958776	0.518886
ENSG00000108312.15	UBTF	0.656626	4.71758e-06	0.870533	0.00183168	0.995541	0.8744
ENSG00000108344.15	PSMD3	1.60511	7.66369e-07	1.17735	0.000415304	1.02759	0.332017
ENSG00000108370.17	RGS9	0.468144	1.47729e-06	0.861223	0.00551377	0.625229	0.000120663
ENSG00000108375.13	RNF43	0.291678	8.5239e-06	0.73749	0.00373336	0.670859	0.000724762
ENSG00000108443.14	RPS6KB1	0.607394	0.00322413	0.911504	0.392429	0.879332	0.307557
ENSG00000108506.13	INTS2	0.575275	7.41586e-05	0.926969	0.274312	1.03019	0.587616
ENSG00000108679.13	LGALS3BP	0.58735	6.62827e-08	1.0415	0.117624	1.07007	0.0109119
ENSG00000108691.9	CCL2	1.65315	0.00045659	1.3818	0.0143354	0.890424	0.221365
ENSG00000108786.11	HSD17B1	2.57215	1.05764e-05	1.03593	0.757331	0.385738	0.000829659
ENSG00000108798.9	ABI3	0.527409	1.68242e-05	0.606728	0.000158666	0.811254	0.00397634
ENSG00000108821.14	COL1A1	0.426216	5.61166e-05	1.30528	0.00241542	0.433025	6.18876e-05
ENSG00000108828.16	VAT1	1.83016	9.10565e-08	1.24951	8.4524e-05	1.00796	0.65293
ENSG00000108830.10	RND2	1.60326	0.00108413	1.90031	0.000369057	0.596134	0.000276461
ENSG00000108840.16	HDAC5	1.62691	9.34559e-05	1.4327	0.000274368	0.862184	0.0316614
ENSG00000108861.9	DUSP3	2.23154	2.13741e-07	1.51288	1.59823e-05	1.07639	0.0891647
ENSG00000108947.5	EFNB3	0.422879	4.66723e-06	0.751128	0.00187535	1.04856	0.300116
ENSG00000108960.9	MMD	0.428946	0.000156107	0.568529	0.00102553	0.809442	0.0585458
ENSG00000108963.19	DPH1	1.81321	0.00154614	1.29661	0.00229329	1.06937	0.439661
ENSG00000108984.15	MAP2K6	0.246177	9.11712e-06	0.463303	8.2729e-05	1.37768	0.00596309
ENSG00000109079.10	TNFAIP1	1.78424	2.18896e-05	1.22406	0.00263624	0.85132	0.0128738
ENSG00000109099.16	PMP22	0.559103	4.52538e-05	1.09565	0.0469794	0.858326	0.0176224
ENSG00000109107.14	ALDOC	0.400139	3.78178e-05	0.540582	0.000422742	0.472715	0.000175291
ENSG00000109255.11	NMU	0.550349	0.000749813	0.63641	0.00199937	1.17557	0.0476952
ENSG00000109320.13	NFKB1	1.50578	0.000180534	1.14648	0.00342467	0.82977	0.00336571
ENSG00000109321.11	AREG	0.640103	0.0492377	0.37575	0.00474081	1.0557	0.722933
ENSG00000109390.13	NDUFC1	1.91952	6.85019e-06	1.11309	0.0727876	1.23041	0.00508506
ENSG00000109466.14	KLHL2	0.542777	1.06909e-05	0.909802	0.147054	1.10792	0.0352711
ENSG00000109472.14	CPE	0.472354	1.28799e-05	0.977176	0.439064	1.18644	0.0003262
ENSG00000109501.15	WFS1	1.72648	3.555e-07	1.4695	3.11318e-06	0.987022	0.763866
ENSG00000109511.12	ANXA10	0.0287751	1.73112e-08	0.032339	1.75477e-08	2.23231	1.25515e-07
ENSG00000109576.14	AADAT	0.582473	6.01977e-05	0.776784	0.00112502	1.06401	0.265538
ENSG00000109610.6	SOD3	1.59809	0.00595631	1.68262	0.003154	1.15789	0.220838
ENSG00000109625.19	CPZ	0.657329	0.00459997	0.689902	0.000942787	0.998046	0.977839
ENSG00000109674.4	NEIL3	0.580398	0.000165427	0.782797	0.0192464	0.921388	0.208584
ENSG00000109738.11	GLRB	0.521463	0.0007264	0.844065	0.120679	0.9424	0.444247
ENSG00000109790.18	KLHL5	0.647531	4.44943e-06	0.774461	5.43916e-05	1.433	9.82314e-06
ENSG00000109819.9	PPARGC1A	0.411323	0.00544183	0.54161	0.0210912	0.842428	0.401337
ENSG00000109854.14	HTATIP2	1.74665	3.289e-05	1.32859	0.00280555	1.00793	0.899148
ENSG00000109956.13	B3GAT1	0.52164	3.04396e-05	0.778474	0.00705868	1.86333	0.000630669
ENSG00000110031.13	LPXN	2.40702	0.00186857	0.796832	0.18366	1.56474	0.0664017
ENSG00000110218.9	PANX1	1.73398	3.90918e-05	1.22191	0.00950125	0.906532	0.149464
ENSG00000110315.7	RNF141	0.634982	0.000539605	0.940562	0.555364	1.03197	0.70984
ENSG00000110492.17	MDK	0.506098	1.26327e-07	0.67911	1.15133e-05	1.36043	2.38535e-06
ENSG00000110693.19	SOX6	0.276821	0.000587964	0.442949	0.00312106	0.815931	0.220052
ENSG00000110811.20	P3H3	0.58354	0.000110836	0.742739	0.00111833	0.937726	0.286083
ENSG00000110871.15	COQ5	0.61815	0.000288391	0.987813	0.784763	0.719476	0.00224273
ENSG00000110881.12	ASIC1	0.454069	2.06146e-06	0.761483	0.000305449	0.5835	4.31295e-05
ENSG00000111077.18	TNS2	0.563024	0.0019337	0.683127	0.00776307	1.04974	0.572804
ENSG00000111186.13	WNT5B	2.92736	5.21884e-05	0.75584	0.0667425	0.89888	0.415235
ENSG00000111206.13	FOXM1	0.551432	9.9723e-07	0.853421	0.000710352	0.881127	0.00367903
ENSG00000111247.15	RAD51AP1	0.636085	1.10375e-05	0.873521	0.00762026	1.06083	0.286289
ENSG00000111276.12	CDKN1B	0.41188	9.3097e-08	0.772373	6.61577e-05	0.958194	0.17649
ENSG00000111305.19	GSG1	1.51327	0.0005137	1.3981	0.0618598	2.3564	4.15463e-05
ENSG00000111319.13	SCNN1A	0.101832	0.0363058	0.308864	0.0930284	0.507088	0.270739
ENSG00000111331.14	OAS3	1.87297	1.63208e-05	0.868438	0.200187	0.927738	0.376156
ENSG00000111344.12	RASAL1	0.431017	0.000118665	0.846928	0.10748	0.60574	0.00185381
ENSG00000111424.12	VDR	1.98944	0.000175239	1.65519	5.60217e-06	0.589991	8.58602e-05
ENSG00000111554.15	MDM1	0.659414	0.00248318	0.882442	0.104722	0.929888	0.281244
ENSG00000111602.12	TIMELESS	0.660649	4.21993e-07	0.912315	0.0135857	1.03904	0.0986781
ENSG00000111696.12	NT5DC3	0.590685	7.90212e-05	0.726095	0.000890449	0.785009	0.00400336
ENSG00000111907.21	TPD52L1	2.16556	0.000214103	1.55781	0.00242602	0.782609	0.0448872
ENSG00000111913.20	RIPOR2	1.90108	0.000364062	2.1319	0.00115723	1.70609	0.00285977
ENSG00000111962.8	UST	1.75826	0.00193364	1.76676	0.00148231	1.09726	0.328308
ENSG00000112096.19	SOD2	2.52211	1.37299e-05	1.31736	0.0120899	0.899741	0.280414
ENSG00000112175.8	BMP5	0.656755	0.00104288	0.936813	0.326631	1.14851	0.0499137
ENSG00000112186.13	CAP2	0.628993	4.97141e-05	0.814385	0.00135567	1.26927	0.000456425
ENSG00000112320.12	SOBP	0.56155	0.00182022	0.677812	0.0116091	0.671733	0.00340041
ENSG00000112378.12	PERP	1.84672	2.61336e-06	1.15328	0.0150324	0.931905	0.297767
ENSG00000112394.18	SLC16A10	0.556995	0.00818868	0.770294	0.131903	1.22021	0.187263
ENSG00000112406.5	HECA	1.55818	8.51133e-05	1.28987	0.000820508	0.997262	0.959182
ENSG00000112414.15	ADGRG6	1.94265	0.00265898	0.830634	0.0824978	1.53576	0.0206053
ENSG00000112559.15	MDFI	0.501284	2.29143e-05	0.817413	0.00824589	0.281265	4.99257e-06
ENSG00000112769.20	LAMA4	0.25296	0.000480496	0.453097	0.00779021	1.13274	0.35666
ENSG00000112877.8	CEP72	0.302442	1.89219e-06	0.54944	1.38003e-05	1.28383	0.00488301
ENSG00000113161.17	HMGCR	1.58152	0.000441411	1.59673	0.000130863	0.904013	0.167691
ENSG00000113211.6	PCDHB6	4.14029	1.82925e-10	2.46583	5.67569e-09	0.767986	6.90404e-05
ENSG00000113248.6	PCDHB15	1.83945	2.97523e-05	1.74312	3.14218e-05	0.882263	0.0163597
ENSG00000113356.13	POLR3G	1.64946	0.00061287	1.59726	0.00238571	0.823855	0.266861
ENSG00000113368.12	LMNB1	0.485683	1.7577e-07	0.904222	0.00244706	0.991702	0.75799
ENSG00000113430.10	IRX4	0.386787	8.62526e-05	0.373273	8.11509e-05	1.77808	0.000248376
ENSG00000113504.21	SLC12A7	0.46468	5.38121e-05	0.684386	0.00341086	1.09143	0.156944
ENSG00000113552.16	GNPDA1	1.86443	5.18375e-06	1.39863	8.98328e-05	1.15065	0.00252653
ENSG00000113645.15	WWC1	2.23365	4.57092e-05	1.33202	0.00725556	1.57649	8.24209e-05
ENSG00000113721.14	PDGFRB	0.504583	8.26897e-05	0.96388	0.566415	1.09537	0.180229
ENSG00000113732.9	ATP6V0E1	1.68469	5.69022e-05	1.40551	0.000136789	1.46495	4.02523e-05
ENSG00000114026.22	OGG1	0.50841	0.000568681	0.849762	0.0668845	0.699463	0.0138141
ENSG00000114166.8	KAT2B	0.65652	0.000397205	0.941685	0.432498	1.27267	0.0215506
ENSG00000114251.15	WNT5A	0.553567	6.33426e-05	0.923579	0.301534	2.29988	6.28544e-05
ENSG00000114268.12	PFKFB4	0.527593	1.87313e-05	0.856881	0.0552613	0.842913	0.0133011
ENSG00000114315.4	HES1	0.567315	8.39528e-05	0.824815	0.00967031	0.968704	0.612174
ENSG00000114353.17	GNAI2	0.60991	6.85017e-08	0.982052	0.424109	1.07916	0.00352893
ENSG00000114388.14	NPRL2	0.640387	0.000667987	0.906046	0.0866726	1.02866	0.703698
ENSG00000114473.14	IQCG	2.28641	0.00019495	1.25092	0.188575	0.775398	0.235251
ENSG00000114529.13	C3orf52	1.55391	0.0144682	1.30798	0.017624	1.0938	0.363622
ENSG00000114626.18	ABTB1	1.7912	2.4796e-05	1.38578	0.00195494	1.00365	0.967043
ENSG00000114739.14	ACVR2B	0.61997	0.000375547	1.09947	0.093503	0.993926	0.90486
ENSG00000114857.19	NKTR	0.656749	0.00248944	0.924622	0.276494	0.897603	0.180474
ENSG00000115009.13	CCL20	3.09447	0.000111402	2.09637	0.00107842	0.833015	0.398415
ENSG00000115232.14	ITGA4	1.56799	0.0023619	1.53569	0.0486936	0.797896	0.0690489
ENSG00000115255.12	REEP6	0.626491	0.00240385	0.704825	0.0038625	1.4668	0.000459623
ENSG00000115267.9	IFIH1	1.88954	9.8115e-05	0.901349	0.0814657	0.944351	0.29819
ENSG00000115318.12	LOXL3	0.454852	0.000408864	0.728437	0.00789313	0.813342	0.0288964
ENSG00000115380.20	EFEMP1	0.286795	5.48798e-05	0.499981	0.000463177	0.35299	0.000108792
ENSG00000115461.5	IGFBP5	0.153596	1.4877e-05	0.579789	0.00089232	1.24079	0.0196468
ENSG00000115468.13	EFHD1	0.63214	0.0428531	0.964966	0.724509	0.786748	0.0570253
ENSG00000115525.18	ST3GAL5	0.546389	0.00184579	0.826346	0.0961043	1.29808	0.0339601
ENSG00000115641.19	FHL2	1.61803	5.48981e-05	0.79958	0.00906661	1.12754	0.0986794
ENSG00000115648.14	MLPH	1.60875	0.000179812	1.10127	0.274543	1.79804	0.0105638
ENSG00000116016.14	EPAS1	1.53553	0.0155572	1.43546	0.0370744	0.769934	0.200325
ENSG00000116106.12	EPHA4	0.657991	0.013279	0.660073	0.019394	1.0937	0.515623
ENSG00000116132.12	PRRX1	0.432486	0.00797057	0.661186	0.0583352	0.564026	0.023997
ENSG00000116151.14	MORN1	0.665162	0.00040961	0.660648	0.0012592	0.871216	0.03621
ENSG00000116337.20	AMPD2	1.93762	1.41644e-06	1.39535	4.33421e-05	1.2371	0.000798972
ENSG00000116455.14	WDR77	1.50014	3.72781e-05	1.21913	0.00273713	1.40498	8.10284e-05
ENSG00000116604.19	MEF2D	1.57979	0.000455207	1.33708	0.000369204	0.970766	0.512548
ENSG00000116661.11	FBXO2	4.55396	1.988e-09	1.87707	6.81912e-06	0.696334	0.000557292
ENSG00000116701.15	NCF2	2.93149	1.156e-05	1.59306	0.00351682	0.799249	0.134078
ENSG00000116717.13	GADD45A	1.9573	0.000161443	0.989326	0.865134	1.70891	4.12584e-05
ENSG00000116962.15	NID1	0.457917	5.24808e-09	0.658158	7.15298e-07	1.01175	0.438472
ENSG00000116990.11	MYCL	0.307004	5.20784e-06	0.674692	0.00230785	0.982491	0.75249
ENSG00000117114.21	ADGRL2	0.314566	6.96431e-06	0.626976	0.000117551	1.80771	5.12311e-06
ENSG00000117122.14	MFAP2	0.50393	5.74603e-07	0.935866	0.0377389	0.737337	2.78394e-05
ENSG00000117143.13	UAP1	1.52092	0.000424415	1.19857	0.0101792	1.04976	0.401737
ENSG00000117226.12	GBP3	3.19154	4.55072e-06	1.76616	0.0010432	1.78848	0.0252537
ENSG00000117245.13	KIF17	1.94782	6.15128e-05	1.09063	0.537233	1.10402	0.409011
ENSG00000117318.9	ID3	0.640496	0.00095864	0.678347	0.00472979	1.76531	1.81107e-05
ENSG00000117410.14	ATP6V0B	1.70723	2.38945e-05	1.30499	0.000111535	1.33617	0.000173495
ENSG00000117525.14	F3	3.77797	1.10673e-06	2.17988	2.32887e-05	0.769533	0.0620824
ENSG00000117632.23	STMN1	0.636076	1.57094e-08	0.896579	8.04633e-05	1.0185	0.199322
ENSG00000118160.14	SLC8A2	0.56171	0.00949398	0.707435	0.0343445	0.745353	0.0530307
ENSG00000118162.14	KPTN	1.65768	0.00233387	1.23521	0.0979502	1.13015	0.463397
ENSG00000118193.12	KIF14	0.650615	0.000885353	1.14511	0.022637	0.774563	0.00333141
ENSG00000118420.17	UBE3D	1.64348	0.00935833	1.62595	0.00382392	0.922268	0.590731
ENSG00000118503.16	TNFAIP3	3.39192	0.000179638	1.83714	0.00284341	0.845343	0.166234
ENSG00000118508.5	RAB32	2.02413	7.74376e-07	1.27634	2.23747e-07	0.910816	0.000948271
ENSG00000118515.12	SGK1	0.536409	0.00691589	1.17321	0.292662	0.585738	0.0219112
ENSG00000118523.6	CCN2	0.633875	7.01747e-06	0.632822	1.45757e-05	1.26881	0.00871233
ENSG00000118785.15	SPP1	4.41847	3.38115e-05	1.05797	0.773245	0.33788	0.00545576
ENSG00000118804.9	STBD1	1.54762	0.000798991	1.5253	0.000388384	0.940476	0.580955
ENSG00000118855.21	MFSD1	2.72568	1.74153e-05	1.80027	7.6683e-05	0.798925	0.0121187
ENSG00000118960.13	HS1BP3	1.99993	3.01417e-05	1.46928	1.43803e-05	0.807151	0.00143694
ENSG00000119318.13	RAD23B	1.71654	1.40405e-05	1.10744	0.0219379	0.922509	0.0034476
ENSG00000119326.15	CTNNAL1	1.70799	0.000167383	1.17152	0.0437652	0.964448	0.656606
ENSG00000119328.12	ABITRAM	1.68607	2.10762e-05	1.04562	0.345775	0.860061	0.00572872
ENSG00000119397.19	CNTRL	0.497262	0.000103038	0.871981	0.275499	1.18277	0.0486631
ENSG00000119403.15	PHF19	0.591521	6.99369e-06	0.835274	0.000494842	1.08243	0.0685114
ENSG00000119537.18	KDSR	1.53566	0.000584768	1.31062	0.0171616	0.733826	0.0217442
ENSG00000119596.18	YLPM1	0.666219	9.65638e-06	0.775417	9.33968e-05	1.02101	0.57933
ENSG00000119630.14	PGF	0.496446	9.49549e-05	0.65975	0.00108238	1.25476	0.0103997
ENSG00000119681.12	LTBP2	0.579098	6.34671e-05	0.653397	0.00024044	0.337072	1.44078e-05
ENSG00000119711.13	ALDH6A1	0.541863	2.24912e-05	0.649371	0.000316005	0.724253	5.38064e-05
ENSG00000119782.14	FKBP1B	0.557306	0.000369285	0.911575	0.153301	0.737761	0.00389146
ENSG00000119866.22	BCL11A	0.566902	0.0020065	0.879862	0.339822	0.757021	0.0879683
ENSG00000119878.6	CRIPT	1.51433	0.000307431	1.40292	0.00292496	0.894516	0.197798
ENSG00000119899.13	SLC17A5	2.41401	1.40864e-08	1.57023	0.000278329	0.777583	0.000964604
ENSG00000119906.13	SLF2	0.663917	0.000276238	0.878373	0.0462178	0.700965	0.000393142
ENSG00000119917.15	IFIT3	4.38594	3.8244e-06	1.13056	0.165538	0.939742	0.54555
ENSG00000119938.9	PPP1R3C	0.523457	0.000155409	0.770988	0.0260897	1.14074	0.0643601
ENSG00000119969.15	HELLS	0.535121	0.000526776	0.894545	0.24924	1.42073	0.00996112
ENSG00000119986.7	AVPI1	3.24194	7.56082e-09	1.69424	1.74359e-05	0.727503	0.00126204
ENSG00000120129.6	DUSP1	2.53866	7.58669e-06	1.81385	0.000199102	1.3229	0.0321386
ENSG00000120162.10	MOB3B	2.40193	2.16207e-05	2.22813	1.90134e-05	0.521002	0.00250176
ENSG00000120256.11	LRP11	1.66531	0.000271659	1.0412	0.670561	0.979145	0.842415
ENSG00000120306.11	CYSTM1	2.12219	1.61865e-06	1.32035	0.00247845	1.71245	0.000145571
ENSG00000120324.9	PCDHB10	1.54535	0.000834298	1.33542	0.00259767	0.825442	0.0513366
ENSG00000120328.6	PCDHB12	1.51525	0.0072118	1.38576	0.0151537	1.14915	0.108421
ENSG00000120802.14	TMPO	0.611354	1.93954e-05	0.892996	0.0267999	0.866675	0.00510529
ENSG00000120837.8	NFYB	0.620041	0.00351769	0.76586	0.00211947	0.764478	0.00491788
ENSG00000120885.22	CLU	0.540708	5.70832e-05	0.712402	0.00116358	0.376348	9.60424e-06
ENSG00000120889.13	TNFRSF10B	1.65845	4.70281e-06	1.1713	0.00275434	0.720865	1.59243e-06
ENSG00000120899.18	PTK2B	0.493306	6.93953e-05	0.65757	0.0335888	0.444387	0.00168483
ENSG00000120937.9	NPPB	0.623823	0.00242807	0.731256	0.0848799	1.29698	0.221225
ENSG00000121005.9	CRISPLD1	0.516839	0.000770999	0.761862	0.0270092	0.491394	0.000573494
ENSG00000121039.10	RDH10	1.57066	0.000540394	1.06129	0.428422	0.943246	0.483116
ENSG00000121060.19	TRIM25	2.17548	5.51919e-07	1.29781	0.000290753	1.1643	0.0203247
ENSG00000121152.10	NCAPH	0.664762	7.79874e-06	1.0345	0.303703	0.915302	0.0753082
ENSG00000121210.16	TMEM131L	0.601972	0.00495526	1.03758	0.737515	1.39433	0.0181644
ENSG00000121361.5	KCNJ8	0.639515	0.0159957	0.818024	0.156189	0.996534	0.974798
ENSG00000121440.15	PDZRN3	0.460366	4.50289e-05	1.19634	0.024001	0.529268	0.000325883
ENSG00000121552.4	CSTA	0.23097	5.22437e-05	0.331013	0.000176194	0.327534	0.000338852
ENSG00000121578.13	B4GALT4	1.54458	4.33264e-05	1.39635	0.000216337	1.0267	0.657796
ENSG00000121897.15	LIAS	0.629665	0.00169741	0.700251	0.00326466	0.928834	0.414341
ENSG00000122420.10	PTGFR	0.630168	3.61223e-05	0.739665	0.000160137	1.29721	0.00567335
ENSG00000122592.8	HOXA7	0.535009	0.000154288	0.699248	0.00527945	1.31297	0.0039451
ENSG00000122641.11	INHBA	0.365246	9.36726e-05	0.566685	0.000783831	0.76425	0.0262807
ENSG00000122694.16	GLIPR2	0.615206	0.00038579	0.878436	0.0310576	0.804467	0.00264926
ENSG00000122861.16	PLAU	4.03571	4.53176e-06	1.71414	0.00286972	0.825247	0.206656
ENSG00000122862.5	SRGN	0.269862	2.11131e-05	0.317137	3.01226e-05	0.857518	0.104721
ENSG00000122870.12	BICC1	0.517806	2.4201e-05	0.970367	0.641284	0.740057	0.00804598
ENSG00000122884.13	P4HA1	0.652579	0.000134682	1.08173	0.0825727	0.675767	0.000257787
ENSG00000123080.12	CDKN2C	0.615043	1.45956e-05	0.740449	0.00053783	0.898081	0.0285907
ENSG00000123095.6	BHLHE41	0.377931	0.00209084	1.24821	0.17	0.412963	0.00264732
ENSG00000123096.12	SSPN	0.403685	0.000395558	0.80067	0.25129	0.73981	0.0497001
ENSG00000123213.23	NLN	2.46465	7.75015e-06	2.35654	1.54267e-09	0.918022	0.268228
ENSG00000123240.17	OPTN	2.27109	1.32734e-06	1.27133	0.00244668	0.702727	0.00173523
ENSG00000123358.20	NR4A1	1.83832	4.32112e-05	1.83749	8.90265e-05	0.910322	0.142051
ENSG00000123364.5	HOXC13	0.610455	2.52654e-05	0.966932	0.505482	1.11875	0.0563551
ENSG00000123485.12	HJURP	0.65483	0.000114978	1.09903	0.0108299	0.993677	0.806767
ENSG00000123545.6	NDUFAF4	1.61811	0.00130476	1.18041	0.139668	1.30818	0.0704956
ENSG00000123636.19	BAZ2B	0.593914	0.00590647	0.868896	0.219207	0.875282	0.277397
ENSG00000123689.6	G0S2	2.34959	0.000412261	1.1475	0.404718	0.872242	0.267614
ENSG00000123975.5	CKS2	1.65629	2.0836e-07	1.21877	0.000195168	0.911014	0.00186715
ENSG00000123989.15	CHPF	1.56748	5.71741e-07	1.26991	1.62237e-06	0.946765	0.0761978
ENSG00000124145.6	SDC4	2.66857	1.6496e-07	1.65793	2.53661e-06	1.15874	0.0047449
ENSG00000124191.18	TOX2	0.54679	0.000578122	0.923279	0.330586	1.08152	0.33488
ENSG00000124201.15	ZNFX1	1.66967	1.86866e-06	1.21164	0.000667275	1.02101	0.602018
ENSG00000124216.4	SNAI1	0.620793	0.00025552	0.802444	0.00660151	0.953896	0.249128
ENSG00000124406.16	ATP8A1	0.633425	0.000222748	0.933287	0.459198	0.929161	0.429376
ENSG00000124422.12	USP22	0.644239	4.54549e-07	0.68566	3.20097e-06	0.908386	0.00767472
ENSG00000124459.12	ZNF45	0.637067	0.00323083	0.797803	0.0231746	1.11881	0.168592
ENSG00000124496.12	TRERF1	0.615318	2.75443e-06	0.899511	0.00991644	1.14195	0.00913268
ENSG00000124523.17	SIRT5	0.65669	0.00647303	0.81162	0.128276	1.02509	0.811023
ENSG00000124570.21	SERPINB6	0.603254	3.38832e-06	0.743254	7.47586e-06	1.1734	0.0166071
ENSG00000124574.15	ABCC10	1.54284	0.0111589	1.26525	0.221759	0.82111	0.253908
ENSG00000124635.9	H2BC11	0.262415	4.58675e-06	0.327374	1.16249e-05	0.719822	0.00122106
ENSG00000124762.14	CDKN1A	2.33347	1.14512e-08	1.10475	0.0138317	1.20572	0.000179329
ENSG00000124795.17	DEK	0.64424	0.000193328	0.727406	0.000828611	1.09174	0.0980869
ENSG00000124920.14	MYRF	0.264656	1.11078e-05	1.2198	0.0168948	0.929115	0.330878
ENSG00000125089.18	SH3TC1	1.60726	6.69166e-05	0.881536	0.0359254	1.2202	0.000470105
ENSG00000125347.15	IRF1	1.96601	0.0460604	1.19936	0.517394	1.077	0.803065
ENSG00000125354.24	SEPTIN6	0.55385	0.000982285	1.00154	0.982953	1.03047	0.728883
ENSG00000125355.16	TMEM255A	0.567523	0.00529063	0.937984	0.569685	0.851353	0.229603
ENSG00000125378.16	BMP4	0.633541	0.000448477	0.902157	0.167255	1.15459	0.0445009
ENSG00000125384.7	PTGER2	0.332272	5.02019e-05	0.583705	0.000886011	0.55697	0.00117698
ENSG00000125398.8	SOX9	0.45259	9.55343e-08	0.854726	0.000226188	1.19065	0.000297914
ENSG00000125657.5	TNFSF9	1.86903	8.26553e-05	1.34958	0.00873913	1.58032	0.000839777
ENSG00000125726.11	CD70	1.9678	3.43141e-05	1.26822	0.0173583	2.21438	6.53766e-05
ENSG00000125753.14	VASP	1.57156	1.74107e-05	1.20416	0.00147038	1.03499	0.50329
ENSG00000125772.14	GPCPD1	0.626616	0.00594536	0.803341	0.094399	0.975754	0.678449
ENSG00000125813.14	PAX1	1.83788	0.00346881	1.66041	0.00251069	1.14164	0.327867
ENSG00000125848.10	FLRT3	0.41581	0.00512528	0.56491	0.0192274	1.49422	0.0123274
ENSG00000125877.13	ITPA	1.75039	2.64413e-05	1.28064	0.000380801	1.11188	0.0566894
ENSG00000125885.13	MCM8	0.618088	0.00035573	0.829996	0.0148882	0.872961	0.0404273
ENSG00000125895.6	TMEM74B	1.76963	0.0120194	1.62238	0.012556	1.78469	0.00679023
ENSG00000125931.11	CITED1	0.66295	0.0324417	1.04202	0.780181	1.4271	0.00922297
ENSG00000125968.9	ID1	0.38007	0.00011504	0.755279	0.0208125	1.33925	0.00366872
ENSG00000126005.17	MMP24OS	1.94686	9.6669e-05	1.67044	0.00900718	1.3307	0.0815219
ENSG00000126217.21	MCF2L	1.59634	0.00342917	1.31476	0.0110507	1.06442	0.333622
ENSG00000126249.8	PDCD2L	1.547	0.003053	1.32429	0.154572	1.12114	0.373315
ENSG00000126351.13	THRA	0.635291	4.20041e-06	0.893179	0.020785	1.04727	0.287915
ENSG00000126368.6	NR1D1	0.506185	0.00129681	0.37544	0.000403735	1.10138	0.396457
ENSG00000126458.4	RRAS	1.73321	1.82111e-06	1.15229	0.00631831	0.639261	6.69941e-05
ENSG00000126524.11	SBDS	1.64604	6.05244e-05	1.24036	0.0006046	0.8523	0.00358654
ENSG00000126561.18	STAT5A	2.23081	2.97697e-05	1.27259	0.0817038	1.34791	0.0131909
ENSG00000126777.18	KTN1	0.583526	7.05159e-05	0.828284	0.0063365	0.81983	0.00366805
ENSG00000126787.13	DLGAP5	0.588684	2.06592e-05	0.949974	0.159237	0.72922	8.91442e-05
ENSG00000126878.13	AIF1L	0.554123	0.000841485	0.83463	0.0754163	1.18904	0.0653543
ENSG00000126947.13	ARMCX1	2.16473	2.66312e-06	1.29627	0.00311023	1.07567	0.224715
ENSG00000127080.10	IPPK	1.83012	0.000311047	1.03632	0.373482	1.00559	0.916722
ENSG00000127184.13	COX7C	1.72351	1.0819e-07	1.37063	1.68419e-06	1.06412	0.0133637
ENSG00000127586.17	CHTF18	0.470152	0.000111061	0.54943	0.000204988	1.1794	0.0361894
ENSG00000127616.20	SMARCA4	0.542562	4.39882e-06	0.964674	0.271316	1.06376	0.0709787
ENSG00000127824.15	TUBA4A	3.44238	3.58294e-05	1.95114	0.000201884	0.854382	0.25712
ENSG00000127914.19	AKAP9	0.568104	0.000372136	0.760856	0.00482872	1.34067	0.00121337
ENSG00000127920.6	GNG11	0.325177	2.72058e-05	0.348837	3.25287e-05	1.51426	0.000228606
ENSG00000127955.17	GNAI1	0.450162	2.12848e-06	0.575461	8.64444e-06	1.66211	1.63311e-05
ENSG00000127980.16	PEX1	0.56956	0.000940871	0.523882	0.000630737	1.29757	0.0196194
ENSG00000127989.14	MTERF1	0.601674	0.00634059	0.814276	0.117359	1.2842	0.0419362
ENSG00000127995.17	CASD1	0.592334	0.00122432	0.681972	0.00108492	1.15372	0.0249251
ENSG00000128045.7	RASL11B	0.246592	2.12892e-05	0.830545	0.076599	0.610285	0.000860849
ENSG00000128268.12	MGAT3	0.403046	2.42177e-06	0.465144	4.16429e-07	0.929994	0.0687149
ENSG00000128335.14	APOL2	1.82961	0.000117154	0.964618	0.431573	1.21618	0.00174411
ENSG00000128340.15	RAC2	1.73369	4.77334e-05	0.888547	0.164793	1.92859	3.87024e-05
ENSG00000128422.18	KRT17	1.88495	1.71426e-05	1.35855	9.39003e-05	1.02296	0.637115
ENSG00000128510.12	CPA4	2.01879	1.48329e-05	1.18269	0.0551695	0.893483	0.22953
ENSG00000128534.8	LSM8	0.641406	0.0185019	0.780021	0.0530868	0.723958	0.0174183
ENSG00000128536.16	CDHR3	0.586672	0.000150617	0.601745	0.000462845	1.16422	0.155263
ENSG00000128578.10	STRIP2	1.53745	0.00614183	1.19711	0.0172855	1.34757	0.0292245
ENSG00000128591.16	FLNC	1.61342	2.43146e-07	1.32237	2.81663e-05	1.28226	0.000178001
ENSG00000128606.13	LRRC17	0.411143	0.00194636	1.75696	0.00763354	0.463977	0.0030989
ENSG00000128656.15	CHN1	0.625919	0.00457518	0.768665	0.0802904	0.555513	0.00364778
ENSG00000128791.12	TWSG1	0.561557	2.45125e-06	0.909628	0.0035404	0.962563	0.208727
ENSG00000128805.15	ARHGAP22	1.76812	0.000408564	1.1244	0.479611	0.815217	0.261763
ENSG00000128915.12	ICE2	4.2	4.23643e-07	3.21227	1.72149e-05	0.861952	0.133825
ENSG00000128951.14	DUT	0.538205	7.38687e-06	0.697112	9.30844e-05	0.77548	0.000391147
ENSG00000129159.9	KCNC1	0.643715	3.55823e-05	0.827062	0.0040444	0.640512	1.8818e-05
ENSG00000129170.10	CSRP3	4.53247	9.96386e-06	1.96104	9.17454e-06	0.581419	0.00329782
ENSG00000129534.14	MIS18BP1	0.588891	0.000310745	0.98513	0.777477	0.63621	0.00114537
ENSG00000129625.13	REEP5	1.91581	1.0639e-05	1.34364	0.00316198	1.28632	0.0984372
ENSG00000129657.16	SEC14L1	0.556427	3.16144e-05	0.980596	0.731813	1.03286	0.400786
ENSG00000129691.16	ASH2L	0.524023	5.84247e-06	0.682934	0.000248936	1.34074	0.000144359
ENSG00000129810.15	SGO1	0.481056	0.000320471	1.16016	0.0613422	0.713117	0.0379623
ENSG00000129946.11	SHC2	1.83532	6.66366e-06	1.20792	0.0149547	1.14938	0.130476
ENSG00000130052.14	STARD8	0.622021	0.000240289	1.10272	0.0210625	0.719733	0.000443514
ENSG00000130054.5	NALF2	7.14692	8.89502e-09	2.15403	6.45201e-07	0.952607	0.140346
ENSG00000130066.17	SAT1	1.62675	2.63857e-05	0.924311	0.510206	1.18233	0.116624
ENSG00000130176.8	CNN1	1.51411	0.000103899	1.31676	0.00768136	0.90638	0.158076
ENSG00000130203.10	APOE	1.52169	0.00379697	1.17045	0.177951	0.81095	0.13837
ENSG00000130208.10	APOC1	0.519139	0.0477991	0.520335	0.0484128	2.061	0.0370905
ENSG00000130294.18	KIF1A	2.43444	0.000982649	1.29889	0.153732	0.831111	0.302848
ENSG00000130363.13	RSPH3	2.02502	3.2932e-05	1.54475	0.000562845	0.953321	0.47334
ENSG00000130433.8	CACNG6	0.519751	0.000338354	0.505198	0.000324159	1.1334	0.249356
ENSG00000130449.6	ZSWIM6	1.88863	5.82552e-07	1.49499	1.00451e-05	1.06305	0.221361
ENSG00000130475.15	FCHO1	0.540806	0.0120932	0.992134	0.956329	1.19797	0.273921
ENSG00000130558.20	OLFM1	1.96287	2.3139e-06	1.42033	0.00116418	1.43363	0.000867777
ENSG00000130589.16	HELZ2	1.56871	7.16239e-05	1.08645	0.433703	1.17463	0.0923405
ENSG00000130592.17	LSP1	0.230208	0.00110726	0.310045	0.00213241	1.4474	0.0413323
ENSG00000130598.17	TNNI2	0.554609	0.0332686	0.707978	0.197883	1.07591	0.680554
ENSG00000130600.20	H19	0.148186	0.000387921	0.261403	0.000864281	0.587979	0.0164525
ENSG00000130635.16	COL5A1	1.52329	0.000238524	1.23622	0.0114567	0.707675	0.00306976
ENSG00000130702.15	LAMA5	0.583934	2.53159e-05	0.939306	0.137075	1.29408	0.0025721
ENSG00000130706.13	ADRM1	1.5907	2.77257e-06	1.17488	0.000200659	1.16445	0.000772715
ENSG00000130707.18	ASS1	0.527877	0.00120029	0.756849	0.0515603	0.389139	0.000394596
ENSG00000130726.12	TRIM28	0.544745	4.49707e-06	0.634078	5.87643e-07	1.3336	6.19546e-05
ENSG00000130762.15	ARHGEF16	0.6161	2.93524e-05	0.480178	5.6151e-06	1.44579	0.0115858
ENSG00000130783.14	CCDC62	1.81431	0.000926221	1.71527	9.40311e-05	0.80055	0.0635893
ENSG00000130810.20	PPAN	1.59585	0.000180217	1.1467	0.0766331	1.09424	0.33918
ENSG00000130822.16	PNCK	0.607818	0.0470444	0.592834	0.0474037	0.491205	0.0135514
ENSG00000130948.10	HSD17B3	0.328404	8.7668e-06	0.254458	1.37669e-06	0.981731	0.842479
ENSG00000130956.14	HABP4	2.26287	3.00182e-05	1.39473	0.000421231	1.1225	0.127054
ENSG00000130997.16	POLN	1.71193	0.00233451	1.83211	0.00646562	0.894495	0.325669
ENSG00000131037.15	EPS8L1	0.471282	0.00348518	0.409913	0.00155617	1.42722	0.124201
ENSG00000131094.4	C1QL1	0.488734	3.17263e-06	0.623572	2.04511e-05	0.829908	0.00935146
ENSG00000131242.18	RAB11FIP4	0.546329	0.00168592	0.951566	0.620691	0.651621	0.0123298
ENSG00000131323.16	TRAF3	1.79504	3.18545e-06	1.24516	0.0149225	1.08797	0.272646
ENSG00000131370.16	SH3BP5	0.533684	1.38695e-05	1.49193	1.92092e-05	0.400023	2.08689e-06
ENSG00000131381.12	RBSN	0.625043	1.33037e-05	0.988916	0.727223	0.705404	4.5731e-06
ENSG00000131389.18	SLC6A6	0.598319	2.61057e-06	0.858871	0.00541389	0.566547	4.34476e-06
ENSG00000131409.13	LRRC4B	0.619305	3.74424e-07	0.77275	5.16231e-06	0.87635	0.000224815
ENSG00000131650.14	KREMEN2	0.631165	0.000784917	0.835061	0.0147872	0.740708	0.00307859
ENSG00000131652.14	THOC6	0.526165	2.12252e-07	0.808664	8.83935e-05	0.938661	0.106187
ENSG00000131737.7	KRT34	2.39873	0.000200745	1.3698	0.0363642	0.870705	0.371978
ENSG00000131771.14	PPP1R1B	0.503192	0.000183382	0.881602	0.118251	1.0029	0.978634
ENSG00000131773.14	KHDRBS3	0.656888	0.000124356	0.775608	0.0195442	1.05288	0.51811
ENSG00000132000.14	PODNL1	0.427345	0.00010344	0.96097	0.664409	0.318838	6.07013e-05
ENSG00000132003.10	ZSWIM4	1.7719	6.35515e-05	1.21536	0.0150354	0.923224	0.103
ENSG00000132031.13	MATN3	0.627902	0.000409054	1.13458	0.0984407	0.553524	0.000185902
ENSG00000132155.14	RAF1	0.601188	4.63319e-06	0.99903	0.972972	0.707756	0.000217144
ENSG00000132182.12	NUP210	0.441703	3.41506e-07	0.832751	0.00301189	0.43952	3.61991e-07
ENSG00000132199.20	ENOSF1	0.11736	0.000142916	0.117073	0.000142596	1.56729	0.0143763
ENSG00000132274.16	TRIM22	1.58263	0.000547783	0.723158	0.0122449	1.59379	0.000162431
ENSG00000132326.12	PER2	0.43537	0.000119582	0.771769	0.024376	0.518659	0.000317916
ENSG00000132357.14	CARD6	2.10707	8.69385e-05	1.34417	0.00260877	0.806883	0.0442007
ENSG00000132361.18	CLUH	1.58588	0.000101921	1.08943	0.253802	0.977171	0.708407
ENSG00000132386.11	SERPINF1	0.0755192	1.78602e-07	0.235872	8.45031e-06	0.140717	3.30605e-07
ENSG00000132470.14	ITGB4	0.461753	0.0020471	0.808597	0.159479	0.992977	0.946645
ENSG00000132478.10	UNK	0.614312	1.021e-05	1.02778	0.330746	0.95519	0.193273
ENSG00000132535.22	DLG4	0.536359	0.000179379	0.768381	0.0222581	0.958659	0.559956
ENSG00000132563.17	REEP2	0.386994	6.21835e-06	0.574277	5.28573e-06	1.12283	0.0729236
ENSG00000132646.11	PCNA	0.637001	1.40925e-05	0.734787	2.85154e-05	1.13745	0.00260493
ENSG00000132669.14	RIN2	1.55085	0.00144715	1.28365	0.0137968	0.995386	0.953389
ENSG00000132670.21	PTPRA	0.647038	0.000358556	1.02944	0.575562	0.890047	0.0544166
ENSG00000132688.11	NES	0.199716	5.15121e-07	0.684326	0.000390768	1.00383	0.926612
ENSG00000132749.11	TESMIN	2.17133	0.00828369	1.11399	0.611841	0.497611	0.0441231
ENSG00000132780.17	NASP	0.661827	3.70748e-05	0.858727	0.00290562	1.02499	0.395867
ENSG00000132824.14	SERINC3	1.65726	3.83798e-05	1.24594	0.000829151	1.03114	0.459238
ENSG00000132879.14	FBXO44	1.61115	1.79523e-05	1.19115	0.0329779	1.11986	0.19979
ENSG00000132965.10	ALOX5AP	0.313031	0.00253216	0.723796	0.119321	0.305342	0.00261311
ENSG00000133026.14	MYH10	0.621194	2.40713e-05	0.810309	0.000607802	0.749058	0.00164929
ENSG00000133134.12	BEX2	2.45213	1.6742e-07	1.63323	2.77603e-05	1.58466	0.000142676
ENSG00000133247.14	KMT5C	0.537629	0.00476044	0.579859	0.00782421	1.18462	0.21648
ENSG00000133256.13	PDE6B	2.23586	0.00021059	1.3371	0.0484955	0.450226	0.00295289
ENSG00000133794.20	ARNTL	1.92437	3.39343e-05	1.27827	0.0380981	1.49819	0.0010856
ENSG00000133816.18	MICAL2	1.63379	1.28758e-05	1.63376	3.86324e-06	0.791443	0.00320556
ENSG00000133872.14	SARAF	0.400833	3.26267e-08	0.461435	2.85643e-07	0.25558	6.9088e-09
ENSG00000133943.21	DGLUCY	1.5552	5.49259e-06	1.2362	0.043283	1.23688	0.154502
ENSG00000134014.17	ELP3	0.562009	0.00218284	0.591355	0.00254356	0.428432	0.000473958
ENSG00000134030.14	CTIF	1.62595	0.000314188	1.05768	0.488733	1.09924	0.271491
ENSG00000134058.12	CDK7	2.00521	0.000418798	1.55221	0.000916538	0.942537	0.55165
ENSG00000134072.11	CAMK1	0.58715	2.57153e-05	1.01095	0.795323	0.626142	2.07313e-05
ENSG00000134086.8	VHL	0.588741	2.82158e-05	1.03358	0.310705	0.717472	3.21845e-05
ENSG00000134107.5	BHLHE40	1.56032	0.000783498	1.3575	0.0109278	0.555377	0.00146945
ENSG00000134222.16	PSRC1	0.582247	5.62353e-08	0.938224	0.0188597	1.02157	0.346429
ENSG00000134253.10	TRIM45	0.588926	0.00309982	0.641779	0.00313894	1.22273	0.0759312
ENSG00000134265.13	NAPG	0.566245	2.44806e-05	0.961201	0.378208	1.23495	0.000693455
ENSG00000134323.12	MYCN	0.279241	1.64605e-08	0.674394	0.00325953	0.734809	0.000649035
ENSG00000134339.9	SAA2	5.12909	0.00132332	2.30727	0.00679399	0.727273	0.0514348
ENSG00000134480.16	CCNH	1.88172	4.54679e-06	1.73123	5.92796e-05	1.12098	0.053541
ENSG00000134531.10	EMP1	0.613256	0.00118315	0.700213	0.012056	0.872971	0.406211
ENSG00000134532.19	SOX5	0.555556	0.0062096	0.913695	0.399407	1.25995	0.0213666
ENSG00000134548.11	SPX	0.635514	0.0279973	1.01558	0.920652	0.952492	0.85881
ENSG00000134668.13	SPOCD1	1.65864	0.000952167	0.819767	0.198846	0.793189	0.110517
ENSG00000134769.23	DTNA	1.85868	0.000599988	1.60651	0.0112916	1.04482	0.751597
ENSG00000134802.18	SLC43A3	1.70343	4.37648e-05	1.06328	0.11323	0.977803	0.683656
ENSG00000134853.12	PDGFRA	0.253244	5.49662e-05	0.687377	0.0105121	0.510421	0.000558241
ENSG00000134901.13	POGLUT2	0.62257	0.00252806	0.955819	0.291321	0.563494	1.61557e-05
ENSG00000134905.17	CARS2	1.74183	1.53923e-06	1.1251	0.131153	0.6968	0.00480192
ENSG00000134986.14	NREP	0.596174	0.00023642	0.986617	0.786302	0.794791	0.0025289
ENSG00000135047.16	CTSL	2.16982	3.0534e-07	2.19198	7.95771e-07	0.558224	2.52596e-07
ENSG00000135049.16	AGTPBP1	1.87854	9.15887e-06	1.26353	0.000948279	1.19221	0.00385326
ENSG00000135070.15	ISCA1	1.60671	5.63763e-05	1.21693	0.000632846	1.09595	0.0515072
ENSG00000135077.9	HAVCR2	1.97393	0.00241415	1.74847	0.00235737	0.831288	0.0478863
ENSG00000135097.7	MSI1	0.603752	0.000215611	0.960949	0.567223	0.804364	0.00915138
ENSG00000135111.16	TBX3	0.57577	0.00146612	0.816391	0.0217759	0.741144	0.0060705
ENSG00000135114.13	OASL	2.22142	1.55997e-05	0.97178	0.779181	0.586107	0.00785817
ENSG00000135127.12	BICDL1	2.40325	9.53e-06	1.75438	0.00046444	0.781485	0.0346817
ENSG00000135144.8	DTX1	0.616619	0.00373873	0.843904	0.117201	0.690396	0.0120303
ENSG00000135362.14	PRR5L	1.55	0.00324395	1.14323	0.142506	0.6375	0.0200475
ENSG00000135373.13	EHF	0.204941	0.00225144	0.510733	0.0272872	0.799109	0.265099
ENSG00000135414.10	GDF11	0.476665	4.19602e-05	0.818233	0.0116286	1.09741	0.12204
ENSG00000135424.19	ITGA7	0.604723	0.00061539	0.896209	0.119483	1.28605	0.00253046
ENSG00000135437.10	RDH5	0.531553	0.00149769	0.76432	0.0579003	0.676942	0.0248026
ENSG00000135439.12	AGAP2	0.302974	8.86495e-05	0.68597	0.0189143	0.846275	0.106389
ENSG00000135447.17	PPP1R1A	0.559863	0.00251689	0.98528	0.893456	0.9421	0.561802
ENSG00000135451.13	TROAP	0.641	4.74287e-05	1.0037	0.928814	1.11566	0.0428244
ENSG00000135480.17	KRT7	0.638788	0.0016501	0.395864	0.000219705	0.914187	0.372663
ENSG00000135549.15	PKIB	0.238678	4.82059e-05	0.385698	0.000154318	1.9523	7.12569e-05
ENSG00000135631.17	RAB11FIP5	1.63236	7.40388e-07	1.3944	3.91413e-07	0.860966	6.76618e-05
ENSG00000135636.15	DYSF	2.62823	6.05365e-07	1.91713	4.69752e-06	0.768042	0.0107981
ENSG00000135638.14	EMX1	0.591179	0.0026379	0.718405	0.0443045	0.882952	0.4129
ENSG00000135678.12	CPM	0.548434	0.0326407	0.860241	0.473654	1.21012	0.262651
ENSG00000135698.10	MPHOSPH6	1.50007	0.00195648	1.41157	0.000535357	0.864019	0.0732896
ENSG00000135821.19	GLUL	10.6687	1.49385e-06	5.87889	2.41663e-05	0.346021	5.17115e-06
ENSG00000135899.19	SP110	1.6563	0.000237615	1.09721	0.350442	0.854411	0.0781147
ENSG00000135905.20	DOCK10	1.5644	0.0226794	1.0971	0.249205	1.50708	0.0241209
ENSG00000135919.14	SERPINE2	0.553471	0.00157567	0.833545	0.0918219	1.15783	0.370868
ENSG00000135924.17	DNAJB2	1.92439	7.1851e-06	1.45015	0.000259218	1.21048	0.0300064
ENSG00000135925.9	WNT10A	1.50977	0.00328972	2.08736	6.59768e-06	0.938813	0.509689
ENSG00000135926.15	TMBIM1	1.81508	6.79286e-07	1.16491	0.0174583	0.869349	0.00551745
ENSG00000136052.10	SLC41A2	2.17329	0.00547581	1.23895	0.184548	1.05762	0.730565
ENSG00000136122.18	BORA	0.63293	2.36733e-05	1.00267	0.964088	0.787723	0.00138752
ENSG00000136158.12	SPRY2	0.606793	7.28141e-05	0.786413	0.00892515	0.460054	1.70999e-06
ENSG00000136167.15	LCP1	4.04612	1.27312e-05	1.12621	0.246363	1.18528	0.044682
ENSG00000136235.17	GPNMB	4.2387	4.43255e-08	1.4052	0.000575818	1.07541	0.188026
ENSG00000136327.7	NKX2-8	2.22028	6.07169e-05	2.21329	0.00163975	0.699301	0.00620368
ENSG00000136425.14	CIB2	0.641817	0.000203791	0.802284	0.0102958	0.845872	0.0426868
ENSG00000136492.10	BRIP1	0.575875	0.000157804	0.969463	0.364145	0.944191	0.152692
ENSG00000136720.7	HS6ST1	0.626236	1.1718e-07	1.01901	0.38546	0.999016	0.944556
ENSG00000136840.19	ST6GALNAC4	2.45331	6.14703e-07	1.35828	4.56299e-05	1.04324	0.395118
ENSG00000136842.14	TMOD1	2.15219	7.88695e-05	1.07475	0.0236469	0.977104	0.543488
ENSG00000136848.18	DAB2IP	0.5999	6.53623e-05	0.755097	0.000896503	1.29799	0.00387074
ENSG00000136859.10	ANGPTL2	0.483363	0.00191695	0.43812	0.00243431	0.716287	0.0504349
ENSG00000136861.19	CDK5RAP2	0.652279	0.00157432	0.818117	0.0252673	1.2051	0.00986559
ENSG00000136869.16	TLR4	0.347886	2.25716e-05	0.416493	2.89254e-05	1.38198	0.00247424
ENSG00000136891.14	TEX10	1.62128	2.62943e-06	1.11347	0.0279148	0.959546	0.316473
ENSG00000136937.13	NCBP1	1.6279	1.01234e-05	1.17854	0.00179848	1.08705	0.0716855
ENSG00000136943.12	CTSV	0.41014	6.57496e-06	0.612188	0.000184951	0.625042	9.53887e-05
ENSG00000136997.21	MYC	2.5993	2.45595e-06	1.49533	0.00199199	0.836565	0.0301495
ENSG00000137070.19	IL11RA	0.578713	0.000106884	0.90152	0.179225	0.607018	0.00136204
ENSG00000137124.8	ALDH1B1	1.78216	1.77685e-07	1.65819	4.4539e-07	0.785997	0.00072484
ENSG00000137135.18	ARHGEF39	0.643076	3.10917e-05	0.928802	0.173514	0.562702	2.32929e-05
ENSG00000137198.10	GMPR	0.278519	0.0125758	0.361481	0.0276155	0.545556	0.119388
ENSG00000137216.19	TMEM63B	1.90058	5.62188e-06	1.36312	6.03445e-05	0.86247	0.00902648
ENSG00000137266.15	SLC22A23	0.60706	5.34253e-05	0.678655	0.00019777	1.51415	2.36159e-05
ENSG00000137273.6	FOXF2	0.512862	9.25456e-06	0.603948	3.28535e-05	1.08769	0.121269
ENSG00000137274.13	BPHL	0.495722	0.0246784	0.866409	0.395383	1.28705	0.10511
ENSG00000137331.12	IER3	1.55021	0.00261006	1.72905	0.0028028	1.1406	0.387485
ENSG00000137501.18	SYTL2	1.67629	0.00435546	0.592152	0.00923199	0.885305	0.40466
ENSG00000137502.10	RAB30	1.53872	0.0118371	0.87418	0.361318	0.870105	0.398615
ENSG00000137507.11	LRRC32	1.91502	0.00270095	1.23399	0.341118	0.616995	0.0057454
ENSG00000137699.17	TRIM29	3.16536	1.68055e-06	1.70781	0.000298822	1.44224	0.0028585
ENSG00000137726.17	FXYD6	0.360432	8.60582e-07	0.811761	0.00106783	0.961728	0.413883
ENSG00000137770.14	CTDSPL2	0.508118	0.0007743	0.69411	0.00543375	0.822031	0.0532401
ENSG00000137801.11	THBS1	0.486774	1.89238e-06	1.67553	4.18679e-07	1.10655	0.00601061
ENSG00000137804.14	NUSAP1	0.611163	5.73508e-05	0.856378	0.00343011	1.0251	0.506035
ENSG00000137812.21	KNL1	0.562937	0.000170932	0.911261	0.219988	1.08741	0.215926
ENSG00000137825.11	ITPKA	0.448011	3.24585e-05	0.496406	6.19468e-05	1.12171	0.118494
ENSG00000137834.15	SMAD6	0.628599	0.00297163	1.01275	0.887352	1.37217	0.00282896
ENSG00000137841.12	PLCB2	0.580717	0.00178672	0.826863	0.103404	1.33157	0.01864
ENSG00000137868.19	STRA6	0.281851	0.000110321	0.630889	0.00303079	1.1707	0.126065
ENSG00000137955.16	RABGGTB	1.75303	0.000241776	1.49564	0.000877367	1.22709	0.0223195
ENSG00000138030.13	KHK	0.64911	0.00755951	0.70957	0.0119196	1.03635	0.662127
ENSG00000138036.18	DYNC2LI1	1.77918	0.000935018	1.29099	0.0587088	0.773528	0.119019
ENSG00000138080.14	EMILIN1	0.151278	8.30316e-08	0.183798	1.44438e-07	0.182056	1.00576e-07
ENSG00000138119.17	MYOF	2.17491	8.77761e-06	1.18144	0.0266745	0.718519	0.00724768
ENSG00000138131.4	LOXL4	2.76432	9.2486e-08	1.40422	4.79168e-05	0.437072	1.1949e-06
ENSG00000138134.12	STAMBPL1	1.56976	0.00220248	1.13599	0.387342	1.01466	0.895776
ENSG00000138162.19	TACC2	1.90138	0.000144135	1.3963	0.000492561	0.667875	0.00201601
ENSG00000138166.6	DUSP5	2.27797	5.02768e-06	1.61998	0.000162438	0.929547	0.560037
ENSG00000138286.15	FAM149B1	0.626977	0.0077215	0.795581	0.107272	0.732791	0.0277745
ENSG00000138311.18	ZNF365	0.561613	0.000546208	0.736702	0.0166153	1.67465	6.65188e-05
ENSG00000138336.9	TET1	0.494724	0.000113004	0.939168	0.400618	0.924891	0.250107
ENSG00000138356.14	AOX1	2.97217	7.10674e-07	0.798743	0.00925406	0.485996	2.80944e-05
ENSG00000138587.6	MNS1	0.605571	7.17451e-05	0.874011	0.0164083	0.689775	0.000145861
ENSG00000138606.20	SHF	0.569798	0.00023025	0.771419	0.000458065	0.716507	0.000902418
ENSG00000138623.10	SEMA7A	2.17473	1.49089e-07	1.57721	0.000108526	0.850419	0.0742936
ENSG00000138641.18	HERC3	0.633719	0.003416	0.650894	0.000725236	1.27024	0.0308354
ENSG00000138642.16	HERC6	1.52597	0.0490767	1.38748	0.0614531	0.916112	0.584362
ENSG00000138658.16	ZGRF1	0.528794	6.04719e-05	0.768336	0.00580456	0.967736	0.598603
ENSG00000138675.17	FGF5	1.51126	0.0051641	1.01722	0.890128	1.08344	0.694303
ENSG00000138685.17	FGF2	0.652783	0.00102026	0.506423	0.000158466	1.09654	0.228281
ENSG00000138688.17	KIAA1109	0.661276	0.00153724	0.730693	0.00801549	1.01793	0.843706
ENSG00000138735.16	PDE5A	2.15224	0.000370312	3.12313	0.00218945	1.38434	0.0443257
ENSG00000138738.11	PRDM5	0.604965	0.00298422	0.81838	0.257528	1.23127	0.314219
ENSG00000138759.20	FRAS1	0.665277	2.13632e-05	1.16307	0.000204711	0.86562	0.0116097
ENSG00000138795.10	LEF1	0.625219	0.00158047	0.697525	0.00161708	0.888716	0.202876
ENSG00000138829.12	FBN2	0.559457	9.86331e-07	0.713563	6.31546e-06	1.35546	5.95829e-06
ENSG00000138944.8	SHISAL1	1.54614	0.000547229	1.21477	0.02703	0.936242	0.395208
ENSG00000139044.12	B4GALNT3	0.666387	0.00526706	1.1895	0.193652	0.964286	0.695482
ENSG00000139083.11	ETV6	0.62257	3.85178e-06	0.934285	0.0680051	1.04129	0.105056
ENSG00000139112.11	GABARAPL1	1.92381	1.52804e-05	1.2527	0.00137392	1.48483	9.11855e-05
ENSG00000139174.12	PRICKLE1	0.554991	0.00226903	1.35948	0.0831118	1.08966	0.528797
ENSG00000139200.14	PIANP	0.375898	0.00287317	0.701363	0.107787	0.984606	0.914211
ENSG00000139211.7	AMIGO2	2.05966	0.00023944	1.42465	0.0119319	0.84102	0.254911
ENSG00000139263.12	LRIG3	0.607544	0.0121218	0.802764	0.0853832	1.3389	0.0133734
ENSG00000139278.10	GLIPR1	3.7568	4.61017e-06	1.92831	0.00101291	0.929543	0.533277
ENSG00000139289.14	PHLDA1	0.27954	2.79682e-07	0.569256	7.68229e-06	1.07407	0.431885
ENSG00000139329.5	LUM	2.2156	8.13147e-06	3.22016	9.23649e-06	0.251751	8.14764e-06
ENSG00000139438.6	FAM222A	0.584564	0.00102206	0.728442	0.000852174	1.32063	0.00117373
ENSG00000139508.15	SLC46A3	1.50089	0.00766009	1.12596	0.319263	0.777646	0.0695013
ENSG00000139618.17	BRCA2	0.64491	0.027986	1.08623	0.563207	1.00838	0.951007
ENSG00000139910.20	NOVA1	0.543724	0.00768015	0.697788	0.0436883	0.576389	0.0130822
ENSG00000139926.16	FRMD6	1.92732	1.48872e-06	0.992952	0.863785	0.612309	6.23151e-05
ENSG00000139946.10	PELI2	0.647138	8.2641e-05	0.709329	4.36315e-05	0.91753	0.0540991
ENSG00000139970.18	RTN1	0.616866	0.00135972	0.806109	0.0277617	0.783533	0.0351661
ENSG00000140104.14	CLBA1	1.62375	0.00145154	1.0299	0.723979	1.30233	0.0607474
ENSG00000140262.18	TCF12	0.611079	0.00018001	0.936087	0.353867	0.833502	0.121376
ENSG00000140326.13	CDAN1	0.653571	0.00138302	0.7725	0.0103303	1.20161	0.045891
ENSG00000140403.13	DNAJA4	1.63442	0.00213576	1.7897	4.23367e-06	0.549947	0.000232434
ENSG00000140416.23	TPM1	0.643163	0.000113749	1.02503	0.539871	0.821402	0.00475752
ENSG00000140464.20	PML	1.69144	0.000159382	1.25424	0.00343629	0.869547	0.0354358
ENSG00000140465.15	CYP1A1	2.46526	0.000284854	1.19486	0.155996	0.877644	0.340287
ENSG00000140526.18	ABHD2	2.05778	4.54875e-05	1.08658	0.200112	1.00957	0.891853
ENSG00000140534.14	TICRR	0.60879	0.000159659	0.874652	0.0404957	0.84267	0.0201084
ENSG00000140600.17	SH3GL3	0.612261	0.014683	0.630651	0.02197	0.558621	0.00707264
ENSG00000140678.17	ITGAX	1.80921	0.00359859	0.970395	0.709091	0.769737	0.0124945
ENSG00000140807.7	NKD1	0.445939	0.0182233	0.612002	0.168001	1.26229	0.210892
ENSG00000140859.16	KIFC3	1.86263	2.42961e-06	1.22197	0.00452723	1.06805	0.498592
ENSG00000140931.20	CMTM3	1.57707	5.87044e-06	1.27266	0.000242312	0.899496	0.0172838
ENSG00000140937.14	CDH11	0.315641	5.97462e-05	0.520399	4.90238e-05	0.708147	0.000999776
ENSG00000140941.14	MAP1LC3B	1.63284	3.91408e-06	1.43383	9.49226e-06	0.905375	0.0141421
ENSG00000140950.16	MEAK7	2.16967	2.92186e-05	1.30818	0.00180416	0.819567	0.0553674
ENSG00000140961.14	OSGIN1	2.21309	6.87236e-05	1.30601	0.00876657	0.778237	0.00140513
ENSG00000141068.15	KSR1	2.44355	0.000370367	1.50954	0.000345167	1.26375	0.0226272
ENSG00000141219.16	C17orf80	0.475291	8.08278e-05	1.01459	0.783001	1.1111	0.0844994
ENSG00000141401.12	IMPA2	0.481854	0.000875591	0.688967	0.00983689	0.765736	0.0417915
ENSG00000141404.17	GNAL	0.493594	0.00343615	0.85345	0.185213	1.16858	0.162702
ENSG00000141446.11	ESCO1	0.597397	0.000556075	0.715761	0.00318649	0.93018	0.312347
ENSG00000141449.16	GREB1L	0.246936	2.61731e-05	0.779412	0.0297354	1.04779	0.67394
ENSG00000141458.13	NPC1	1.54472	0.00325578	1.04263	0.569319	1.03457	0.795201
ENSG00000141526.18	SLC16A3	0.322703	3.65353e-07	1.1792	0.0769174	1.28094	0.0539406
ENSG00000141540.11	TTYH2	0.639772	0.00144158	0.939307	0.327631	0.909675	0.200585
ENSG00000141560.15	FN3KRP	0.664592	0.00179604	0.893055	0.0428704	1.10011	0.0674962
ENSG00000141574.8	SECTM1	0.543339	0.031811	0.745782	0.150843	0.685282	0.128339
ENSG00000141576.16	RNF157	0.58906	0.0330129	0.772791	0.195436	0.915498	0.565068
ENSG00000141577.14	CEP131	0.649267	4.50722e-06	1.10555	0.224539	1.17026	0.00110632
ENSG00000141582.15	CBX4	0.609054	2.1381e-06	1.05739	0.34225	1.15495	0.00062543
ENSG00000141682.12	PMAIP1	1.76984	3.89242e-06	1.2788	0.00121528	1.06074	0.276343
ENSG00000141738.14	GRB7	0.380887	0.000343826	0.503754	0.000794902	0.542662	0.00126686
ENSG00000141753.7	IGFBP4	0.191011	1.50604e-06	0.189663	1.49145e-06	0.190562	1.5173e-06
ENSG00000141858.12	SAMD1	0.576705	1.57456e-05	0.915269	0.0156777	0.974437	0.445298
ENSG00000141933.9	TPGS1	1.58914	0.000177679	1.29509	0.0165542	0.914409	0.23878
ENSG00000141934.10	PLPP2	1.55713	4.42139e-05	1.06093	0.24356	1.06753	0.248207
ENSG00000141968.8	VAV1	2.32368	3.8874e-07	1.8304	8.5116e-05	0.873837	0.113515
ENSG00000142156.16	COL6A1	0.575808	7.12136e-05	0.832248	0.0183173	0.52923	3.85689e-05
ENSG00000142185.18	TRPM2	1.86704	0.000487211	1.32627	0.0110707	0.386741	1.24567e-06
ENSG00000142207.7	URB1	1.63332	0.000203008	1.24663	0.00464808	1.26349	0.00195445
ENSG00000142227.11	EMP3	1.68962	2.06347e-06	1.05042	0.169917	1.06476	0.11273
ENSG00000142230.13	SAE1	0.536279	2.79779e-07	1.07468	0.0394576	0.937531	0.0233382
ENSG00000142303.14	ADAMTS10	0.554401	3.55469e-06	0.809387	0.0369194	1.55942	1.27789e-05
ENSG00000142549.10	IGLON5	0.503872	6.73514e-07	1.14401	0.0211934	0.639809	1.12804e-06
ENSG00000142661.19	MYOM3	2.27707	9.12679e-05	1.01125	0.91924	0.690577	0.008021
ENSG00000142731.11	PLK4	0.638024	0.00120669	0.956458	0.46735	0.935188	0.597246
ENSG00000142871.18	CCN1	1.79655	1.31019e-07	1.22393	0.000644331	1.72407	1.46678e-08
ENSG00000142875.20	PRKACB	0.570731	0.000403103	0.602384	0.000264398	1.00762	0.904569
ENSG00000143126.8	CELSR2	0.636546	3.26457e-06	0.942106	0.14852	1.29579	0.000981646
ENSG00000143156.14	NME7	2.09692	2.5178e-05	1.36007	0.000164305	1.03664	0.425495
ENSG00000143198.13	MGST3	1.57383	7.66018e-07	1.19987	0.00281818	0.943587	0.12222
ENSG00000143322.21	ABL2	1.74609	9.58183e-06	1.19148	0.034716	1.12469	0.0956996
ENSG00000143333.7	RGS16	0.556531	0.000900792	0.980241	0.806961	0.520307	0.000316955
ENSG00000143341.12	HMCN1	0.339631	0.000396134	0.759908	0.0462067	0.623963	0.00572319
ENSG00000143353.12	LYPLAL1	1.66762	0.000459346	1.17681	0.0338739	1.05703	0.704569
ENSG00000143416.21	SELENBP1	0.649583	0.00986359	0.874851	0.331103	0.343862	0.00032973
ENSG00000143469.20	SYT14	1.60609	0.000442574	1.1978	0.0409427	0.958157	0.550235
ENSG00000143494.16	VASH2	0.465872	0.000700695	0.717768	0.0295301	0.928494	0.48697
ENSG00000143502.16	SUSD4	0.647623	0.0405467	0.587695	0.00836142	1.21294	0.137983
ENSG00000143507.18	DUSP10	1.67362	0.000770366	1.59917	0.000336449	0.94997	0.451351
ENSG00000143653.10	SCCPDH	1.64416	3.15043e-05	1.23801	0.00490507	0.942267	0.277745
ENSG00000143801.18	PSEN2	1.63228	0.000433409	1.23869	0.058361	0.992942	0.908862
ENSG00000143842.15	SOX13	0.649018	6.1742e-05	0.856732	0.00752697	1.27336	0.00245286
ENSG00000143891.17	GALM	3.07282	0.000113716	2.21966	0.000710476	0.705097	0.0620326
ENSG00000144218.21	AFF3	0.638453	0.00126814	0.958499	0.467427	0.709496	0.0105008
ENSG00000144227.5	NXPH2	0.633126	0.0011367	0.779163	0.0185976	1.38854	0.00141359
ENSG00000144366.16	GULP1	2.39542	0.00184187	1.16652	0.281418	0.872531	0.46355
ENSG00000144476.6	ACKR3	2.25185	1.42215e-06	1.66543	2.91725e-05	1.46413	0.00418775
ENSG00000144485.11	HES6	0.443029	0.00119426	0.825195	0.139064	1.04352	0.713775
ENSG00000144554.13	FANCD2	0.437437	2.62024e-05	0.982112	0.876456	0.591517	0.000272064
ENSG00000144583.5	MARCHF4	2.69583	1.81456e-06	1.29548	0.00273757	0.74971	0.0118807
ENSG00000144596.13	GRIP2	0.575882	0.0167085	0.468417	0.0043852	0.702215	0.0708203
ENSG00000144597.14	EAF1	0.651087	1.92233e-05	1.11101	0.0700208	0.827062	0.00708537
ENSG00000144645.15	OSBPL10	0.289663	1.97007e-07	0.86326	0.00267591	0.827679	0.00266308
ENSG00000144674.17	GOLGA4	0.647211	0.00257669	1.10732	0.231668	0.916451	0.289604
ENSG00000144677.15	CTDSPL	0.439536	0.000395465	0.775173	0.0346788	0.789857	0.027252
ENSG00000144681.11	STAC	0.531682	0.00100993	0.982277	0.823083	1.01736	0.876703
ENSG00000144746.7	ARL6IP5	1.57054	3.40583e-05	1.04367	0.471412	0.950876	0.155458
ENSG00000144749.14	LRIG1	1.50625	0.000249334	0.97584	0.730599	1.03166	0.657163
ENSG00000144785.8	ENSG00000144785	1.65974	0.00340007	0.980158	0.865358	1.13166	0.349148
ENSG00000144810.16	COL8A1	0.612031	0.000616632	0.7695	0.00767794	1.3188	0.00780402
ENSG00000144857.15	BOC	0.612621	0.0174203	0.590753	0.0159909	1.11465	0.504103
ENSG00000144893.13	MED12L	0.633144	0.0274901	0.766289	0.230786	0.910057	0.613139
ENSG00000144959.11	NCEH1	1.54293	0.0169045	1.30019	0.0489607	1.16204	0.283428
ENSG00000145041.16	DCAF1	0.619501	9.48675e-05	0.981477	0.675208	1.03988	0.257294
ENSG00000145107.16	TM4SF19	4.06735	9.35011e-07	1.29669	0.0266877	0.989807	0.929035
ENSG00000145113.22	MUC4	1.58115	0.00206355	1.82853	0.0145666	0.751309	0.0168001
ENSG00000145198.15	VWA5B2	0.224404	7.34908e-06	0.381019	4.63861e-05	1.79523	0.00013158
ENSG00000145241.11	CENPC	0.633233	0.000714186	0.848702	0.0266294	0.84475	0.0133938
ENSG00000145242.14	EPHA5	0.506217	2.46627e-05	0.595027	0.000185719	1.57371	0.00171152
ENSG00000145247.12	OCIAD2	1.57131	2.00999e-05	1.02202	0.670271	1.18857	0.0143986
ENSG00000145287.11	PLAC8	2.13146	1.88448e-05	2.06594	3.15674e-05	1.46376	0.00270085
ENSG00000145348.17	TBCK	0.617015	0.00224676	0.851325	0.0720547	0.822594	0.106155
ENSG00000145362.21	ANK2	1.61908	0.0104141	1.10293	0.392783	0.770849	0.0505788
ENSG00000145386.11	CCNA2	0.644165	2.33601e-05	0.842969	0.00119042	0.949355	0.110305
ENSG00000145431.11	PDGFC	0.171438	1.30552e-05	0.207717	1.62411e-05	1.48768	0.000264503
ENSG00000145632.15	PLK2	2.51872	6.19926e-05	1.37326	0.00875718	1.78386	0.00151249
ENSG00000145681.11	HAPLN1	0.303093	0.000118249	1.69749	0.000187754	0.504595	0.00104075
ENSG00000145685.14	LHFPL2	1.65296	1.03759e-05	1.4736	0.000167245	1.21597	0.0204704
ENSG00000145794.17	MEGF10	0.485787	0.00382567	0.558883	0.0101937	0.820812	0.199544
ENSG00000145824.13	CXCL14	0.26817	1.0117e-07	1.90407	0.000217642	0.282473	2.53215e-07
ENSG00000145832.15	SLC25A48	0.277264	0.00249829	0.866821	0.426674	0.693655	0.102896
ENSG00000145882.11	PCYOX1L	0.528214	4.18831e-05	0.748693	0.00378914	0.976053	0.688597
ENSG00000145901.16	TNIP1	1.7149	7.43651e-08	1.21585	9.26932e-05	1.1334	0.00305506
ENSG00000145911.6	N4BP3	1.73184	5.374e-07	0.917132	0.212141	1.44786	8.91049e-06
ENSG00000146232.17	NFKBIE	3.25524	1.71699e-07	1.78505	4.99684e-05	0.904564	0.223957
ENSG00000146386.8	ABRACL	1.96635	1.1464e-05	1.32018	0.00174551	1.0343	0.595181
ENSG00000146411.6	SLC2A12	0.545999	4.59118e-07	1.12533	0.0235385	0.77515	0.000802815
ENSG00000146416.19	AIG1	1.54566	3.88391e-06	1.07028	0.324844	0.693865	0.000316611
ENSG00000146555.20	SDK1	0.550191	0.00116657	0.614071	0.00233754	0.826808	0.0803448
ENSG00000146700.9	SSC4D	1.91974	2.25395e-05	1.27819	0.000945235	0.168668	8.18934e-07
ENSG00000146776.15	ATXN7L1	0.587924	0.00683713	0.630563	0.00684696	1.46841	0.0304445
ENSG00000146950.13	SHROOM2	0.49963	2.02661e-05	0.778711	0.00873115	0.616202	0.000809712
ENSG00000146966.13	DENND2A	0.645658	0.00290942	0.719603	0.0169461	0.75335	0.0212732
ENSG00000147041.12	SYTL5	0.375073	0.000113663	0.68841	0.00920714	1.71404	0.00535556
ENSG00000147099.21	HDAC8	0.596455	0.00094845	0.928541	0.346142	0.859658	0.137918
ENSG00000147257.16	GPC3	0.605467	0.0256381	0.732852	0.0860299	0.563693	0.012556
ENSG00000147381.12	MAGEA4	3.62099	5.34977e-09	2.5044	1.24471e-09	0.987052	0.622106
ENSG00000147408.15	CSGALNACT1	0.544529	9.67305e-05	0.447328	2.52728e-05	1.15573	0.192858
ENSG00000147419.19	CCDC25	0.568944	8.28463e-07	0.55806	6.2517e-05	0.396406	5.47021e-07
ENSG00000147421.18	HMBOX1	0.468843	8.91503e-06	0.466883	3.28884e-06	0.382406	1.61626e-05
ENSG00000147475.17	ERLIN2	0.586564	0.000464137	0.647493	0.000393988	1.0179	0.732901
ENSG00000147526.20	TACC1	0.517822	1.14609e-05	0.599387	2.99309e-06	1.34624	0.000522373
ENSG00000147535.17	PLPP5	0.633531	0.0111604	0.597575	0.00556048	1.24281	0.0638352
ENSG00000147536.12	GINS4	0.631769	0.00282925	0.747371	0.0177811	1.23718	0.0159853
ENSG00000147548.17	NSD3	0.525574	5.15407e-05	0.583034	0.000767749	1.09085	0.252956
ENSG00000147642.17	SYBU	1.79196	0.00473325	1.34648	0.100117	1.30626	0.167615
ENSG00000147676.14	MAL2	3.5422	4.87459e-05	2.28772	0.00617045	0.797954	0.0688563
ENSG00000147684.10	NDUFB9	1.51734	3.49251e-06	1.20631	1.45519e-05	0.949358	0.00215177
ENSG00000147804.10	SLC39A4	2.46889	0.000452924	1.26251	0.23871	0.595259	0.0587076
ENSG00000147883.12	CDKN2B	2.01546	0.000184537	1.95779	5.40417e-05	0.242568	0.00015483
ENSG00000148218.16	ALAD	0.643707	5.7148e-05	0.733277	0.00187795	0.994331	0.942003
ENSG00000148344.11	PTGES	3.17622	1.97247e-06	0.893983	0.22549	0.819484	0.0484295
ENSG00000148400.13	NOTCH1	0.617633	1.23935e-05	0.726266	0.000453287	1.87429	1.42706e-06
ENSG00000148541.13	FAM13C	0.363802	0.000989319	0.878733	0.386508	1.01384	0.901904
ENSG00000148677.7	ANKRD1	2.56674	5.49007e-07	1.58595	2.26e-06	1.12862	0.00366676
ENSG00000148700.15	ADD3	0.622858	0.00346837	0.957133	0.607567	0.614451	0.00190236
ENSG00000148734.8	NPFFR1	0.616576	0.000121418	0.690163	0.000469215	1.69326	0.000197785
ENSG00000148773.14	MKI67	0.624912	0.000215406	0.972574	0.651166	0.827463	0.0123759
ENSG00000148848.15	ADAM12	2.82855	4.3926e-05	1.32355	0.0775174	0.981988	0.909955
ENSG00000148948.8	LRRC4C	0.529586	0.000501357	0.561736	0.0005287	0.914596	0.329179
ENSG00000149043.17	SYT8	0.522626	0.0222458	0.660738	0.12548	0.754643	0.197869
ENSG00000149212.12	SESN3	0.487132	6.22699e-07	1.07198	0.105227	0.605762	8.93352e-06
ENSG00000149257.16	SERPINH1	0.536056	1.24226e-06	0.953882	0.110754	0.558989	1.08893e-06
ENSG00000149294.17	NCAM1	0.652674	1.41078e-05	0.90906	0.0546462	1.078	0.0691881
ENSG00000149541.10	B3GAT3	1.88086	3.32432e-07	1.39274	0.000129328	1.19096	0.00249347
ENSG00000149599.16	DUSP15	0.64955	0.0132807	0.945139	0.657794	1.09524	0.38747
ENSG00000149679.12	CABLES2	0.485343	1.45893e-06	1.01652	0.554166	0.800991	0.000275194
ENSG00000149798.5	CDC42EP2	1.89561	0.000414428	1.42287	0.0205293	1.34176	0.0202437
ENSG00000149926.14	TLCD3B	0.513686	0.00118721	0.907702	0.410859	0.828771	0.116624
ENSG00000149948.14	HMGA2	0.499696	0.00021013	0.792733	0.0326268	1.23675	0.0229533
ENSG00000149968.12	MMP3	2.41682	0.000252497	0.829945	0.229872	0.998152	0.991064
ENSG00000150281.7	CTF1	0.476978	9.74802e-07	0.545218	1.30219e-05	0.960331	0.397343
ENSG00000150471.17	ADGRL3	0.221191	9.52996e-08	0.402166	2.72874e-06	0.860402	0.0161398
ENSG00000150540.14	HNMT	0.360815	3.2139e-05	0.545187	0.000254609	0.864213	0.08643
ENSG00000150551.11	LYPD1	0.35876	0.000125721	0.670207	0.00719074	1.72224	0.000493759
ENSG00000150630.4	VEGFC	1.58852	2.46931e-05	0.957895	0.482846	1.48708	0.000847129
ENSG00000150764.14	DIXDC1	0.665404	0.00513707	0.832891	0.0472305	0.738537	0.000895283
ENSG00000150967.19	ABCB9	0.27762	9.90586e-05	0.497821	0.00109947	0.670952	0.00656342
ENSG00000151014.6	NOCT	3.3327	3.34462e-08	1.44896	0.000368309	1.51764	5.25695e-05
ENSG00000151090.20	THRB	0.517045	0.00979051	0.641414	0.0328383	0.684343	0.0632608
ENSG00000151117.9	TMEM86A	3.18252	3.61938e-05	1.77323	0.00126597	0.746681	0.0345326
ENSG00000151150.22	ANK3	0.455659	0.00251643	0.66487	0.0388048	1.18128	0.217151
ENSG00000151468.11	CCDC3	0.63075	2.3292e-05	0.9789	0.597667	0.883872	0.0261003
ENSG00000151503.14	NCAPD3	0.65111	0.000122906	0.918684	0.131735	1.37811	0.000431058
ENSG00000151623.15	NR3C2	0.472113	8.36149e-05	0.895915	0.160304	1.19717	0.210307
ENSG00000151693.11	ASAP2	2.71253	0.000558364	1.31152	0.17244	0.635347	0.0487946
ENSG00000151718.16	WWC2	0.541836	1.22215e-05	0.91698	0.130461	1.5338	0.000357016
ENSG00000151725.12	CENPU	0.606812	2.26949e-06	0.743424	0.000351511	1.21514	6.87259e-05
ENSG00000151835.17	SACS	1.54948	0.000478658	1.41544	0.000680396	0.912482	0.107335
ENSG00000151882.11	CCL28	0.400897	0.000361126	0.795516	0.084027	1.08969	0.574132
ENSG00000151883.19	PARP8	1.97609	0.00169081	1.44525	0.00543847	0.884962	0.217661
ENSG00000152078.10	TLCD4	0.658041	0.00213088	1.0226	0.739576	1.35277	0.00475871
ENSG00000152086.9	TUBA3E	0.385605	2.60607e-05	0.606292	0.00205448	1.01239	0.875223
ENSG00000152137.8	HSPB8	3.64578	5.67918e-07	1.78817	3.4254e-05	0.822122	0.0718823
ENSG00000152208.13	GRID2	0.60177	0.00138498	0.594127	3.88003e-05	1.25905	0.00161298
ENSG00000152217.20	SETBP1	0.56665	6.61608e-05	0.747813	0.00141412	1.11683	0.0395088
ENSG00000152223.15	EPG5	2.68526	0.00013021	1.31076	0.112285	1.02258	0.848759
ENSG00000152284.5	TCF7L1	0.626102	3.26249e-05	0.866304	0.0141082	0.981436	0.644822
ENSG00000152377.14	SPOCK1	2.13654	0.00536541	1.50624	0.0237934	0.648485	0.0103986
ENSG00000152409.9	JMY	1.51452	2.68546e-05	1.40657	0.000710442	1.16604	0.00836766
ENSG00000152457.18	DCLRE1C	0.613413	8.2844e-05	0.958084	0.771464	0.885749	0.0291936
ENSG00000152518.8	ZFP36L2	0.596364	0.00197781	0.68994	0.00862619	0.706135	0.01526
ENSG00000152580.9	IGSF10	0.46	0.00750952	1.39786	0.41176	1.02286	0.871723
ENSG00000152582.14	SPEF2	0.542459	0.00917793	0.89417	0.570642	0.85488	0.386044
ENSG00000152661.9	GJA1	0.488663	2.39323e-06	0.863621	0.00654586	0.557016	5.85614e-06
ENSG00000152669.9	CCNO	1.5296	0.000212882	1.16368	0.105894	1.21749	0.057731
ENSG00000152684.11	PELO	1.70288	9.0437e-06	1.33809	8.16757e-05	1.14089	0.0237039
ENSG00000153029.16	MR1	1.56762	0.00662805	1.10159	0.372648	0.781587	0.0559905
ENSG00000153162.9	BMP6	0.41622	9.10621e-05	0.798928	0.0522645	1.01542	0.856603
ENSG00000153233.13	PTPRR	4.2189	1.37289e-05	2.24803	0.000241058	1.07638	0.386307
ENSG00000153291.16	SLC25A27	1.57701	0.0160477	1.7987	0.0217152	1.00694	0.960877
ENSG00000153395.10	LPCAT1	0.550939	1.40622e-05	0.733466	0.000663354	1.07786	0.0751065
ENSG00000153404.15	PLEKHG4B	0.217012	4.29978e-06	0.325726	2.41744e-05	1.06763	0.34274
ENSG00000153551.14	CMTM7	0.375726	0.000279029	0.941829	0.536755	1.06623	0.586398
ENSG00000153560.12	UBP1	0.647094	0.00039974	1.10715	0.0377481	1.0012	0.976989
ENSG00000153714.6	LURAP1L	1.69758	0.00645707	1.17198	0.299019	1.19227	0.156338
ENSG00000154133.15	ROBO4	3.11168	1.17491e-05	1.42096	0.0859836	0.810997	0.133444
ENSG00000154146.13	NRGN	0.497069	5.50101e-05	0.666536	0.000407287	1.00599	0.924565
ENSG00000154229.12	PRKCA	0.516628	1.77615e-05	1.10222	0.0481099	0.918149	0.178298
ENSG00000154556.18	SORBS2	0.279886	1.8295e-05	0.747786	0.00626602	0.690386	0.0113465
ENSG00000154589.7	LY96	4.28165	0.000309665	1.06546	0.780058	0.782946	0.394387
ENSG00000154678.18	PDE1C	0.587019	0.00069184	0.738656	0.0086206	0.936244	0.569893
ENSG00000154734.16	ADAMTS1	1.80519	0.000200634	1.51429	0.00331671	1.1961	0.16695
ENSG00000154767.15	XPC	0.597262	0.000622434	0.607265	0.000177742	0.708542	0.00249931
ENSG00000154783.12	FGD5	0.424473	0.00216868	0.664135	0.0227518	0.672574	0.02853
ENSG00000154845.16	PPP4R1	0.632521	0.00010668	0.863144	0.0247759	1.04163	0.334199
ENSG00000154864.14	PIEZO2	0.477328	0.00193184	0.905999	0.413366	1.15766	0.307951
ENSG00000154920.15	EME1	0.523399	3.58219e-05	0.748922	0.00727606	0.892087	0.203547
ENSG00000155252.13	PI4K2A	1.75445	2.38643e-08	1.2788	8.6354e-05	0.780158	0.000157961
ENSG00000155254.13	MARVELD1	1.69459	2.3217e-06	1.30042	0.000508485	0.694663	0.000193733
ENSG00000155256.18	ZFYVE27	1.54628	0.00136675	1.46513	0.00439513	1.0448	0.546237
ENSG00000155366.17	RHOC	1.51264	2.90592e-06	1.08665	0.0248021	1.2501	2.626e-05
ENSG00000155622.7	XAGE2	1.67045	0.0273066	2.36983	0.0010419	0.368802	0.00960201
ENSG00000155629.15	PIK3AP1	2.29102	3.45544e-05	1.78752	0.00198191	1.02525	0.703855
ENSG00000155792.10	DEPTOR	0.644426	0.014342	0.691723	0.0214281	0.682432	0.0184889
ENSG00000155962.13	CLIC2	1.68623	0.00101257	1.23906	0.123764	0.620064	0.0144628
ENSG00000155970.12	MICU3	0.57283	0.0116386	0.881509	0.674704	0.975094	0.915147
ENSG00000156011.18	PSD3	0.598338	2.29846e-05	0.836427	0.00474022	1.34529	0.0029317
ENSG00000156050.10	FAM161B	0.650022	0.000139542	0.896255	0.119994	0.872579	0.0836507
ENSG00000156110.15	ADK	1.70269	7.09511e-06	1.41405	0.00173978	0.862254	0.059358
ENSG00000156136.10	DCK	0.619727	6.36601e-07	0.812141	1.71127e-06	1.05779	0.00478277
ENSG00000156265.16	MAP3K7CL	5.32088	1.28938e-06	2.67981	1.42196e-05	0.514153	0.00061855
ENSG00000156345.18	CDK20	3.10625	0.000640076	1.36612	0.139434	1.49103	0.0134373
ENSG00000156398.13	SFXN2	0.591893	0.0024684	0.926142	0.441141	0.481965	0.00021943
ENSG00000156510.13	HKDC1	5.88412	2.50582e-05	1.59943	0.000998233	1.23319	0.360714
ENSG00000156735.11	BAG4	0.545847	0.00171593	0.708568	0.0224061	1.2065	0.053947
ENSG00000156802.13	ATAD2	0.649139	0.000403671	0.849596	0.0158189	1.01776	0.715633
ENSG00000156804.7	FBXO32	1.56799	0.00217573	1.23389	0.00454244	0.854587	0.103463
ENSG00000156970.13	BUB1B	0.588603	4.56883e-05	0.894252	0.0710021	1.02524	0.698069
ENSG00000156990.14	RPUSD3	0.635325	1.22728e-06	1.05978	0.0885061	0.626885	1.15867e-06
ENSG00000157036.13	EXOG	0.609135	0.000621594	1.02525	0.632906	0.931375	0.253803
ENSG00000157110.16	RBPMS	1.62833	0.000322969	1.64509	0.00060076	0.635557	0.000262221
ENSG00000157227.14	MMP14	1.79903	6.26939e-07	1.45631	9.07693e-06	1.01315	0.802589
ENSG00000157240.4	FZD1	0.60334	1.39136e-06	0.737899	4.47415e-05	1.64618	1.16981e-07
ENSG00000157259.8	GATAD1	0.593784	0.00047221	0.605195	0.000429864	1.09596	0.232398
ENSG00000157368.12	IL34	3.56556	4.14587e-05	1.09589	0.596393	0.966732	0.836145
ENSG00000157423.18	HYDIN	1.78027	0.00483261	1.18386	0.104816	1.07025	0.408486
ENSG00000157483.9	MYO1E	2.52456	0.00818118	1.72215	0.0126265	1.21289	0.330438
ENSG00000157538.14	VPS26C	1.52911	0.000321462	1.38202	0.000465514	0.634401	0.00064914
ENSG00000157617.17	C2CD2	2.12471	0.00693211	1.55094	0.0541163	0.888173	0.535933
ENSG00000157657.15	ZNF618	0.493075	4.21635e-06	0.709353	0.00146441	1.07873	0.253667
ENSG00000157680.16	DGKI	2.85696	0.00057781	0.987229	0.964516	0.613027	0.0452718
ENSG00000157827.20	FMNL2	0.450375	0.000451628	0.747191	0.0312394	0.863296	0.136077
ENSG00000157851.17	DPYSL5	0.586161	0.000139163	1.08666	0.114837	0.176688	3.90018e-07
ENSG00000157873.18	TNFRSF14	1.68375	0.00057286	0.54855	0.00402279	0.73938	0.0271081
ENSG00000158023.10	CFAP251	2.61812	4.6694e-05	1.32618	0.041485	1.10431	0.346424
ENSG00000158109.15	TPRG1L	1.68325	3.53267e-05	1.02824	0.603217	0.791992	0.00264777
ENSG00000158122.12	PRXL2C	2.24471	1.80058e-05	1.37405	0.0505975	1.48343	0.00314671
ENSG00000158164.7	TMSB15A	0.425047	8.93039e-06	0.915857	0.108131	1.0632	0.424864
ENSG00000158201.10	ABHD3	0.534371	0.00205845	0.86965	0.347995	1.04961	0.707793
ENSG00000158373.9	H2BC5	0.383703	4.48581e-06	0.384173	2.78196e-06	0.908666	0.194164
ENSG00000158406.6	H4C8	0.18417	0.000103101	0.203767	0.000123781	0.762301	0.0394201
ENSG00000158427.15	TMSB15B	0.581867	0.000786144	0.864716	0.076404	0.83115	0.017541
ENSG00000158473.8	CD1D	0.567192	7.5865e-06	0.772871	0.000505256	1.57855	0.00118076
ENSG00000158560.14	DYNC1I1	0.652665	0.0127838	0.729781	0.0213106	0.976176	0.811623
ENSG00000158792.16	SPATA2L	1.54347	0.000132656	1.28792	0.0026742	1.24406	0.00251486
ENSG00000158825.6	CDA	2.12249	1.87139e-05	1.80032	0.000315874	0.401837	5.58241e-05
ENSG00000158828.8	PINK1	1.71906	2.48237e-07	1.39687	9.62478e-06	0.976916	0.194034
ENSG00000158856.19	DMTN	0.618017	0.00411219	0.701731	0.0136841	0.87679	0.202278
ENSG00000159173.19	TNNI1	0.557292	0.00398275	0.736458	0.0138435	1.14792	0.42726
ENSG00000159176.14	CSRP1	1.57065	2.17959e-06	1.38396	1.04811e-05	1.02562	0.435482
ENSG00000159200.18	RCAN1	1.91385	3.34624e-05	1.54331	9.70339e-05	0.686509	0.000659207
ENSG00000159228.13	CBR1	1.68568	2.00829e-07	1.34802	6.21413e-05	0.761829	0.00190703
ENSG00000159263.16	SIM2	1.66886	1.20377e-05	1.32002	0.00286158	0.761375	0.00532508
ENSG00000159314.12	ARHGAP27	2.23238	0.00213878	1.10521	0.424808	0.768686	0.0875966
ENSG00000159348.13	CYB5R1	1.56519	2.52234e-05	1.02962	0.473535	1.01663	0.765334
ENSG00000159403.18	C1R	0.239807	6.08379e-08	0.476401	0.000121148	0.89516	0.0554464
ENSG00000159674.12	SPON2	3.65544	9.37984e-05	1.61399	0.126958	1.00389	0.983805
ENSG00000159720.13	ATP6V0D1	1.75851	2.35319e-06	1.24494	0.000499396	1.03037	0.576753
ENSG00000159784.18	FAM131B	0.510574	7.51888e-05	0.723867	0.00270877	1.08338	0.322502
ENSG00000159788.20	RGS12	0.610273	0.020392	0.82138	0.23042	0.917985	0.532535
ENSG00000159873.10	CCDC117	0.645711	0.000137368	0.786789	0.00190807	0.992328	0.840238
ENSG00000159958.7	TNFRSF13C	0.572526	0.000193438	0.70317	0.00409398	1.09222	0.388253
ENSG00000160094.15	ZNF362	0.529836	1.41064e-05	0.763145	0.00251187	0.943262	0.203806
ENSG00000160097.20	FNDC5	0.649108	0.015295	0.724724	0.0346648	0.662702	0.00497678
ENSG00000160190.14	SLC37A1	1.80637	0.000376013	1.39225	0.0196816	0.870081	0.320131
ENSG00000160191.18	PDE9A	0.603934	0.0211386	0.510342	0.00871605	0.565955	0.0239701
ENSG00000160255.18	ITGB2	0.562642	0.000245579	0.551253	7.66782e-06	0.544419	9.34134e-06
ENSG00000160298.18	C21orf58	0.550511	2.572e-05	0.706665	0.000508869	0.432463	7.86712e-06
ENSG00000160469.17	BRSK1	0.630874	0.00137514	0.712654	0.0529796	1.4891	0.000165796
ENSG00000160539.6	PLPP7	0.544083	0.00273155	0.654488	0.026577	1.32089	0.135448
ENSG00000160781.17	PAQR6	1.74691	0.000335674	1.087	0.349838	1.23134	0.115984
ENSG00000160886.13	LY6K	3.04823	2.70006e-06	1.3382	0.00329945	0.411708	1.03104e-05
ENSG00000160917.15	CPSF4	0.64723	4.77295e-06	0.629048	9.27973e-06	1.26197	0.000135792
ENSG00000160949.18	TONSL	0.606997	1.38522e-06	0.660741	1.93327e-06	1.14195	0.000762027
ENSG00000160957.15	RECQL4	0.650589	5.98653e-05	0.731909	2.78882e-05	0.888198	0.0287453
ENSG00000160963.14	COL26A1	0.409627	0.000275588	0.556395	0.000174166	1.34214	0.00495333
ENSG00000160993.4	ALKBH4	0.663335	0.000436991	0.591324	0.000163239	1.1054	0.120808
ENSG00000160999.11	SH2B2	0.60207	0.000197046	0.603481	3.2812e-05	1.22625	0.0141965
ENSG00000161011.20	SQSTM1	2.87855	2.79568e-08	1.50962	1.86266e-05	1.4064	0.000587924
ENSG00000161040.17	FBXL13	3.88836	0.000329802	0.789308	0.157598	2.11635	0.0165119
ENSG00000161048.12	NAPEPLD	0.547096	0.0124146	0.610482	0.0192217	0.94051	0.71066
ENSG00000161091.14	MFSD12	2.00684	4.31054e-07	1.2766	0.00103427	1.03269	0.452386
ENSG00000161249.21	DMKN	0.492607	1.41302e-06	0.708854	0.000454584	0.979824	0.730513
ENSG00000161513.12	FDXR	0.666365	1.07752e-05	0.752965	5.78096e-06	1.24899	0.000229967
ENSG00000161642.18	ZNF385A	0.610361	6.17817e-07	0.802872	0.0032223	0.804924	9.42862e-05
ENSG00000161714.12	PLCD3	1.73415	4.90404e-06	1.12085	0.123987	1.01935	0.705578
ENSG00000161835.11	TAMALIN	0.513677	0.00180705	0.976145	0.835889	0.641221	0.00721745
ENSG00000161888.12	SPC24	0.662687	0.000136072	0.773263	0.000958907	0.897366	0.0382296
ENSG00000161896.12	IP6K3	0.424908	0.0122433	0.510379	0.0266254	0.620879	0.157558
ENSG00000161955.17	TNFSF13	0.580886	0.0264014	0.46014	0.0121383	0.924942	0.636482
ENSG00000161981.11	SNRNP25	0.613083	0.00277248	0.6501	0.0057523	0.783612	0.0499103
ENSG00000161999.13	JMJD8	0.625012	7.25958e-06	0.734592	4.46811e-05	0.82718	0.00159769
ENSG00000162062.15	TEDC2	0.621807	0.000110611	0.725011	0.0011171	0.963679	0.466
ENSG00000162068.2	NTN3	0.442697	1.4774e-05	0.592509	9.61477e-05	0.971536	0.728146
ENSG00000162104.10	ADCY9	1.6519	0.000569066	1.19915	0.0484304	1.3118	0.00413653
ENSG00000162373.13	BEND5	0.632026	0.0386483	0.972603	0.825055	1.17903	0.329839
ENSG00000162407.9	PLPP3	0.589192	0.000964897	0.848282	0.0962427	1.32126	0.00275028
ENSG00000162413.17	KLHL21	2.36183	1.46215e-06	1.32429	0.000262145	1.39123	0.000347575
ENSG00000162551.14	ALPL	1.7668	0.00066375	1.08975	0.53753	0.285189	0.00060858
ENSG00000162572.21	SCNN1D	0.644702	0.00708468	0.946572	0.613761	0.96171	0.653759
ENSG00000162599.17	NFIA	0.433682	2.955e-07	0.660777	0.000228377	1.35122	7.63208e-05
ENSG00000162645.13	GBP2	3.29071	0.00618986	1.51475	0.061774	0.686339	0.07026
ENSG00000162706.13	CADM3	0.478701	5.27388e-06	1.27101	0.000692406	0.980577	0.608791
ENSG00000162711.18	NLRP3	1.74714	0.0203996	1.46857	0.0220472	0.765714	0.0101563
ENSG00000162772.17	ATF3	2.07829	9.83546e-05	1.61953	0.00852246	1.56827	0.00029315
ENSG00000162878.13	PKDCC	0.576923	0.000752686	0.59819	0.00226076	0.67632	0.0154691
ENSG00000163040.15	CCDC74A	1.5276	0.000363314	1.48169	0.0011469	0.951168	0.400724
ENSG00000163162.9	RNF149	1.5179	0.000162859	1.44148	0.000467075	1.09828	0.228496
ENSG00000163171.8	CDC42EP3	0.425726	0.000898552	0.69787	0.0191939	0.662531	0.0140177
ENSG00000163347.6	CLDN1	1.59059	0.000803386	0.936398	0.338723	1.06574	0.442699
ENSG00000163359.17	COL6A3	0.285445	0.000275904	1.21211	0.120172	0.545607	0.0205676
ENSG00000163393.13	SLC22A15	1.76015	0.00629625	1.40295	0.0555283	1.06494	0.674089
ENSG00000163453.11	IGFBP7	0.353963	1.8718e-05	0.549404	0.000145666	0.842601	0.0981989
ENSG00000163482.12	STK36	1.50111	0.00841597	1.22791	0.10864	1.14398	0.35694
ENSG00000163485.17	ADORA1	0.593434	0.00176077	0.745001	0.0138104	0.828437	0.0991672
ENSG00000163512.14	AZI2	0.64991	0.000428543	1.02414	0.657216	0.74143	0.00794313
ENSG00000163513.19	TGFBR2	0.503545	0.00168163	0.697334	0.0210804	0.879988	0.257082
ENSG00000163530.4	DPPA2	3.73311	5.0478e-06	2.21284	0.001124	0.407095	1.52064e-05
ENSG00000163531.17	NFASC	1.7988	0.000145287	1.21937	0.0168847	0.733668	0.00448833
ENSG00000163535.18	SGO2	0.644931	0.000106696	1.04712	0.337446	0.841529	0.0091381
ENSG00000163539.18	CLASP2	0.537255	0.00130065	1.06983	0.430317	0.953997	0.604683
ENSG00000163565.20	IFI16	1.66002	6.44129e-05	1.14034	0.00427124	0.748837	0.00132886
ENSG00000163637.13	PRICKLE2	0.631182	0.000723946	1.05345	0.447947	0.942338	0.41992
ENSG00000163703.20	CRELD1	0.485843	4.37992e-07	1.00583	0.917475	0.649536	1.65081e-05
ENSG00000163704.12	PRRT3	0.465614	3.10607e-05	0.748309	0.00157589	0.679256	0.000481998
ENSG00000163738.19	MTHFD2L	0.632195	0.00230349	0.796352	0.00602637	1.19662	0.0670848
ENSG00000163754.18	GYG1	1.67631	0.000901846	1.2557	0.0496047	1.20778	0.051937
ENSG00000163762.7	TM4SF18	0.389313	0.00913819	0.379389	0.00728571	1.36794	0.154239
ENSG00000163803.13	PLB1	1.76906	0.000261489	1.47567	0.000801323	0.732752	0.0302287
ENSG00000163807.6	KIAA1143	0.590447	0.0227034	1.03887	0.809752	0.971291	0.855899
ENSG00000163808.17	KIF15	0.40117	0.000131026	0.970041	0.772351	0.816663	0.0809334
ENSG00000163810.12	TGM4	0.664129	0.00081551	0.708849	0.00060449	1.23977	0.193527
ENSG00000163825.5	RTP3	13.8816	6.52528e-05	6.99789	5.02467e-06	0.913319	0.30014
ENSG00000163874.11	ZC3H12A	1.94593	9.65339e-06	1.09813	0.0382243	0.953501	0.387422
ENSG00000163975.13	MELTF	1.70005	6.63078e-06	0.9667	0.363999	0.706778	0.000130734
ENSG00000163995.21	ABLIM2	1.72069	0.00534005	1.06883	0.809852	0.98135	0.939119
ENSG00000164038.16	SLC9B2	1.85923	0.00917252	1.23958	0.141914	0.778274	0.268676
ENSG00000164045.12	CDC25A	0.523445	0.0011383	0.932493	0.403192	1.06727	0.256425
ENSG00000164062.13	APEH	0.654097	7.83738e-05	0.987037	0.473119	1.00465	0.852984
ENSG00000164080.14	RAD54L2	0.614695	2.40958e-06	0.954429	0.160575	0.926523	0.115466
ENSG00000164087.8	POC1A	0.573846	1.72665e-06	0.992308	0.813491	1.04947	0.202164
ENSG00000164091.12	WDR82	0.615712	1.02441e-05	0.976893	0.418966	0.938485	0.0551745
ENSG00000164093.18	PITX2	0.481695	0.000600364	0.473559	0.000952878	1.51492	0.00868237
ENSG00000164104.12	HMGB2	0.505504	3.04378e-06	0.754828	0.000142547	1.28241	7.98652e-05
ENSG00000164118.13	CEP44	0.64964	0.000147817	0.922397	0.37188	1.06352	0.239608
ENSG00000164134.13	NAA15	1.73629	0.00438255	1.1177	0.297641	0.860867	0.230068
ENSG00000164161.10	HHIP	0.292476	0.000121567	0.391383	0.000333857	1.18386	0.38259
ENSG00000164182.12	NDUFAF2	1.6187	2.66016e-05	1.39598	0.000235181	0.915436	0.209347
ENSG00000164199.18	ADGRV1	0.597403	0.000157064	1.11289	0.236196	1.03746	0.588316
ENSG00000164237.9	CMBL	1.58385	0.00030414	1.23751	0.0109253	1.16013	0.176903
ENSG00000164266.11	SPINK1	4.61739	0.00602345	1.09783	0.616858	0.978261	0.902303
ENSG00000164283.13	ESM1	3.02884	0.00026665	0.7797	0.111237	1.4902	0.137987
ENSG00000164300.17	SERINC5	1.55136	1.46343e-06	1.54683	4.78127e-05	0.950906	0.18806
ENSG00000164306.11	PRIMPOL	0.65247	0.00940634	0.669666	0.0104132	1.17117	0.21645
ENSG00000164308.17	ERAP2	1.546	0.0267394	1.32688	0.0681335	0.951574	0.82143
ENSG00000164338.10	UTP15	1.80898	0.00198898	1.49617	0.00269073	0.953779	0.587579
ENSG00000164346.10	NSA2	1.52803	2.37977e-05	1.37864	0.000941937	1.07614	0.0239583
ENSG00000164347.18	GFM2	1.84929	4.95721e-06	1.58425	4.11619e-06	1.03118	0.442599
ENSG00000164366.4	CCDC127	0.534023	0.000216106	0.777354	0.0741678	1.52368	0.000607815
ENSG00000164400.6	CSF2	2.1946	0.00755351	2.27933	0.0065396	0.987896	0.949638
ENSG00000164442.10	CITED2	2.07521	2.55855e-06	1.62211	6.94603e-05	1.68155	5.67338e-07
ENSG00000164465.19	DCBLD1	1.5163	4.82964e-05	1.56908	4.9425e-05	0.912269	0.0972123
ENSG00000164509.16	IL31RA	1.90793	1.12312e-08	1.53769	2.3764e-06	0.712988	5.86566e-05
ENSG00000164535.15	DAGLB	1.5502	0.000205647	1.06943	0.269168	1.10292	0.101824
ENSG00000164638.11	SLC29A4	0.558487	5.76577e-06	0.756585	0.00093759	0.94825	0.10509
ENSG00000164649.20	CDCA7L	0.625414	8.36491e-05	0.924402	0.175405	0.963019	0.420792
ENSG00000164651.18	SP8	0.628356	0.000267973	0.700503	0.00176484	1.17534	0.0451363
ENSG00000164659.15	ELAPOR2	0.523054	0.00012497	0.653255	0.000125165	1.008	0.813623
ENSG00000164674.17	SYTL3	2.46028	1.75473e-07	1.36419	0.00204593	0.969891	0.592792
ENSG00000164695.5	CHMP4C	1.58888	0.000488089	1.43908	0.00141608	0.734354	0.00690147
ENSG00000164736.6	SOX17	0.642599	0.000989822	0.757466	0.00241269	0.741385	0.00191035
ENSG00000164741.15	DLC1	0.63406	0.0116364	0.830906	0.175717	1.33526	0.0101108
ENSG00000164742.16	ADCY1	0.570995	0.0236242	0.660592	0.0521325	1.10326	0.537552
ENSG00000164764.11	SBSPON	0.546539	0.000221748	0.886237	0.226601	1.07319	0.486424
ENSG00000164867.11	NOS3	3.99521	3.81599e-05	1.33227	0.103563	0.757188	0.187467
ENSG00000164949.8	GEM	1.79522	0.000284542	1.58435	0.00336033	1.25679	0.0307443
ENSG00000164970.15	FAM219A	1.81866	8.99927e-06	1.46986	6.90886e-05	0.98887	0.80074
ENSG00000165030.4	NFIL3	1.87881	5.18376e-05	1.13346	0.216513	1.18864	0.0745608
ENSG00000165046.13	LETM2	2.5553	0.000155139	0.820248	0.164406	0.830564	0.22458
ENSG00000165071.15	TMEM71	1.9831	0.00163895	1.18451	0.352194	0.94507	0.781558
ENSG00000165102.15	HGSNAT	0.645127	0.00293221	0.747468	0.0152446	0.994761	0.955185
ENSG00000165233.18	CARD19	1.57888	3.73405e-05	1.15133	0.0942502	1.17013	0.0124764
ENSG00000165271.17	NOL6	1.8516	4.48775e-07	1.40883	1.72743e-05	1.16625	0.000467553
ENSG00000165280.18	VCP	1.512	5.19067e-06	1.293	8.54173e-05	0.892054	0.0269045
ENSG00000165424.7	ZCCHC24	0.549539	3.02871e-05	0.986851	0.798911	0.83691	0.00680527
ENSG00000165507.9	DEPP1	2.01835	3.98278e-08	1.23217	0.00193838	0.902697	0.000149745
ENSG00000165617.15	DACT1	0.540732	6.3203e-05	0.863933	0.0565593	0.688847	0.000460189
ENSG00000165646.14	SLC18A2	1.53916	0.00406106	1.53786	0.000127398	0.783943	0.0053677
ENSG00000165655.17	ZNF503	0.567161	4.34382e-06	1.0603	0.180997	1.14608	0.00789066
ENSG00000165678.22	GHITM	1.57165	1.21719e-06	1.43488	2.29488e-05	0.664573	1.21997e-07
ENSG00000165802.23	NSMF	1.56645	3.91962e-06	1.33669	2.51626e-05	1.13937	0.00165991
ENSG00000165821.12	SALL2	0.474836	2.11094e-06	0.800211	0.00163639	1.09129	0.0380775
ENSG00000165887.12	ANKRD2	0.646332	0.00118932	0.572568	0.000824825	0.698166	0.00741092
ENSG00000166004.15	CEP295	0.653377	0.00390547	0.910067	0.325764	1.01657	0.853443
ENSG00000166033.13	HTRA1	2.1759	0.000142188	0.987503	0.920922	0.647253	0.0178448
ENSG00000166073.11	GPR176	1.99302	1.08793e-07	1.25145	0.00183734	0.977528	0.593502
ENSG00000166104.15	ENSG00000166104	2.98293	2.44163e-05	1.97544	0.000316947	0.591174	0.00131879
ENSG00000166105.16	GLB1L3	1.52488	0.0278167	1.99834	0.00250195	0.851575	0.311949
ENSG00000166106.4	ADAMTS15	0.644427	0.00113231	0.89325	0.22298	1.78885	4.63318e-05
ENSG00000166166.13	TRMT61A	1.63301	2.29433e-07	1.24419	0.0131857	1.23456	0.00474269
ENSG00000166278.15	C2	1.62166	0.0329331	0.915775	0.621095	0.963904	0.829157
ENSG00000166289.6	PLEKHF1	2.26636	9.34939e-07	1.2162	0.0041767	1.2279	0.0182074
ENSG00000166292.12	TMEM100	0.521106	0.00512074	0.703057	0.0363467	0.72198	0.0594188
ENSG00000166342.19	NETO1	1.71468	0.00678612	1.18213	0.47662	1.05773	0.804601
ENSG00000166348.20	USP54	1.80977	1.82662e-05	1.4714	1.25971e-05	0.771718	0.00139959
ENSG00000166396.13	SERPINB7	3.52737	4.65763e-07	1.98212	0.000231322	0.452514	0.00148413
ENSG00000166401.15	SERPINB8	2.03608	4.81874e-05	1.18981	0.107434	0.946028	0.701128
ENSG00000166405.15	RIC3	1.61901	0.0177883	1.47752	0.0669607	1.1636	0.239946
ENSG00000166450.13	PRTG	0.545181	0.00184388	0.721386	0.0508073	0.556476	0.00283478
ENSG00000166473.17	PKD1L2	2.51296	3.7607e-07	1.41227	0.00283776	0.653414	0.00571775
ENSG00000166507.19	NDST2	1.57361	0.00127301	1.16125	0.0277817	1.09851	0.168583
ENSG00000166508.18	MCM7	0.517648	6.54903e-09	0.60209	1.3871e-08	1.35834	1.17829e-06
ENSG00000166526.18	ZNF3	0.659595	0.000131709	0.72373	0.000186275	1.41559	8.92686e-05
ENSG00000166562.9	SEC11C	1.68855	8.1462e-05	1.2802	0.00569159	1.2529	0.0119056
ENSG00000166582.11	CENPV	0.627762	0.00399021	0.816411	0.104795	1.18603	0.0683075
ENSG00000166592.12	RRAD	5.76901	2.35406e-07	1.56528	0.00277541	1.03874	0.718728
ENSG00000166619.15	BLCAP	1.50126	1.95e-06	1.05415	0.119168	1.10347	0.0279766
ENSG00000166682.13	TMPRSS5	1.74672	0.00901707	1.05677	0.395632	0.969432	0.721899
ENSG00000166685.13	COG1	0.639411	0.0001541	0.974787	0.674025	0.9949	0.919063
ENSG00000166689.16	PLEKHA7	2.32691	2.42898e-05	3.1625	1.20179e-06	0.733565	0.0206572
ENSG00000166736.12	HTR3A	4.21013	9.54048e-08	1.70089	1.93134e-05	1.1321	0.3426
ENSG00000166741.8	NNMT	1.74753	1.92914e-06	1.42154	3.75503e-05	0.66887	0.000100031
ENSG00000166750.10	SLFN5	1.8587	0.00025029	0.889351	0.24653	0.630649	0.00527105
ENSG00000166796.12	LDHC	1.54846	0.00785586	1.06462	0.64337	1.2498	0.153951
ENSG00000166847.10	DCTN5	1.58634	0.00318391	1.1915	0.152865	1.01073	0.926002
ENSG00000166922.9	SCG5	5.54359	2.8968e-06	2.07077	0.0330434	0.694359	0.166125
ENSG00000166924.9	NYAP1	0.508446	2.2788e-05	0.661036	0.0018197	0.963401	0.529634
ENSG00000166961.15	MS4A15	1.75055	0.00446112	2.24455	0.00296057	0.110364	0.00144715
ENSG00000166979.13	EVA1C	1.72154	0.00606548	0.818182	0.240788	1.51843	0.0459676
ENSG00000166997.8	CNPY4	0.431068	1.27492e-06	0.565152	1.1763e-05	1.24967	0.0113207
ENSG00000167074.15	TEF	0.513967	0.000112275	0.783112	0.0122129	0.560595	0.000691936
ENSG00000167088.11	SNRPD1	0.46766	2.95488e-05	0.688728	0.00030267	1.08538	0.199108
ENSG00000167105.8	TMEM92	0.452778	7.54803e-07	0.472222	2.6112e-06	1.38611	0.0051599
ENSG00000167114.13	SLC27A4	1.70668	2.48451e-07	1.28965	0.000134518	0.986459	0.715599
ENSG00000167244.21	IGF2	0.239299	1.30606e-06	0.516806	0.000171754	1.2403	0.00243535
ENSG00000167281.20	RBFOX3	1.55962	0.000813829	1.49903	0.016678	0.708937	0.00790724
ENSG00000167306.20	MYO5B	1.52849	0.00088019	1.09127	0.17585	1.01066	0.86223
ENSG00000167363.14	FN3K	0.482873	0.00665656	0.431492	0.00196178	1.09724	0.496075
ENSG00000167377.19	ZNF23	1.55908	0.000426442	1.1351	0.0118288	0.878801	0.018577
ENSG00000167393.18	PPP2R3B	0.545711	0.00330061	0.640354	0.0133711	1.83528	0.000211415
ENSG00000167393.18	PAR_Y_PPP2R3B	0.545711	0.00330061	0.640354	0.0133711	1.83528	0.000211415
ENSG00000167513.9	CDT1	0.636031	7.91645e-05	0.974812	0.52734	1.11419	0.043014
ENSG00000167536.14	DHRS13	0.660667	0.000162891	0.670058	0.000135875	1.04179	0.470168
ENSG00000167600.14	CYP2S1	0.641745	0.0118657	0.812046	0.116195	1.46469	0.00392697
ENSG00000167614.14	TTYH1	0.087049	1.54178e-06	0.292439	7.8376e-06	1.23429	0.108119
ENSG00000167632.18	TRAPPC9	0.651945	0.0321336	0.629349	0.0145324	0.748363	0.112459
ENSG00000167646.14	DNAAF3	0.620758	0.00256669	0.662568	0.00266234	1.24373	0.0764404
ENSG00000167657.14	DAPK3	1.81722	1.75385e-05	1.28437	0.00343181	1.05043	0.469594
ENSG00000167680.17	SEMA6B	0.580453	6.43708e-08	0.7533	7.74166e-06	0.921965	0.00122422
ENSG00000167695.15	TLCD3A	1.76801	5.70399e-06	1.38496	0.00123988	0.956278	0.714506
ENSG00000167720.13	SRR	0.53015	0.0022226	0.622825	0.00290056	0.658236	0.00310265
ENSG00000167751.13	KLK2	0.451645	0.0108189	1.00798	0.973097	1.05085	0.76645
ENSG00000167755.15	KLK6	0.272704	1.38011e-05	0.761131	0.00802137	0.543037	0.000621411
ENSG00000167771.6	RCOR2	0.525067	0.000830656	0.844744	0.120411	0.750404	0.0142366
ENSG00000167779.9	IGFBP6	0.546108	2.35141e-05	0.80962	0.00364415	0.951766	0.261054
ENSG00000167900.12	TK1	0.488216	5.04011e-08	0.839547	1.44893e-05	0.969528	0.242268
ENSG00000167912.7	ENSG00000167912	0.644026	0.00965116	0.764321	0.0755398	1.21195	0.194481
ENSG00000167994.13	RAB3IL1	1.65	4.85071e-05	1.22021	0.00200534	1.1736	0.00192917
ENSG00000168028.14	RPSA	0.619387	6.4449e-08	0.972871	0.0860139	0.957528	0.0280821
ENSG00000168036.18	CTNNB1	0.532382	1.22271e-05	1.08469	0.0581736	0.983372	0.686717
ENSG00000168062.10	BATF2	2.49091	7.60607e-05	1.06942	0.433389	0.902479	0.268199
ENSG00000168077.14	SCARA3	0.575361	5.81173e-06	0.679484	5.77014e-05	0.308831	3.61757e-07
ENSG00000168078.10	PBK	0.397183	3.43935e-06	0.670367	0.000122278	0.386241	3.03998e-06
ENSG00000168090.10	COPS6	0.655919	1.19375e-05	0.693082	1.80167e-05	1.48588	1.20673e-06
ENSG00000168137.20	SETD5	0.633487	0.0024029	0.999381	0.993323	0.679585	0.00490916
ENSG00000168209.6	DDIT4	0.62926	0.0109583	0.684888	0.0274204	0.589112	0.0119671
ENSG00000168237.18	GLYCTK	0.661531	0.0010181	0.743931	0.00370937	1.09991	0.145369
ENSG00000168255.20	POLR2J3	0.658345	0.000554622	0.836957	0.0191992	0.968054	0.557821
ENSG00000168268.11	NT5DC2	0.46019	6.09292e-06	0.899034	0.0344503	0.836027	0.00443382
ENSG00000168275.16	COA6	1.62203	2.28728e-06	1.21073	0.000733537	1.10804	0.098113
ENSG00000168297.16	PXK	1.5146	4.69701e-05	1.22157	0.00254221	0.792855	0.0220943
ENSG00000168298.7	H1-4	0.654043	0.0248384	0.821904	0.263367	1.22313	0.10174
ENSG00000168389.18	MFSD2A	0.285344	2.48838e-07	0.828355	0.019651	1.14038	0.144799
ENSG00000168394.12	TAP1	2.29082	2.72832e-07	1.21886	0.00341105	1.33252	0.00189633
ENSG00000168404.13	MLKL	1.68548	0.000631989	1.3619	0.00627751	1.47984	0.0101833
ENSG00000168411.14	RFWD3	0.519982	4.42108e-05	1.20607	0.0197081	0.996825	0.944049
ENSG00000168427.9	KLHL30	3.05942	9.21335e-07	1.86599	1.80564e-05	1.08091	0.398488
ENSG00000168453.16	HR	0.456207	3.63236e-06	0.770387	0.000613786	1.06273	0.293314
ENSG00000168481.9	LGI3	0.592949	0.00294619	0.568109	0.000929875	0.926282	0.413108
ENSG00000168488.19	ATXN2L	0.621542	4.23009e-05	1.01062	0.821194	1.03118	0.513885
ENSG00000168497.5	CAVIN2	0.366867	0.00122977	0.722836	0.056755	1.38661	0.0182253
ENSG00000168517.11	HEXIM2	0.439067	6.94325e-06	0.64333	0.000207093	0.804091	0.000391131
ENSG00000168528.12	SERINC2	1.5606	4.27609e-05	1.07183	0.171806	0.94095	0.223457
ENSG00000168530.16	MYL1	1.63526	0.0262301	2.33333	0.00216642	1.13273	0.528245
ENSG00000168556.7	ING2	0.654456	0.000645156	0.791315	0.0122773	1.27125	0.00337479
ENSG00000168646.14	AXIN2	0.441759	2.98527e-05	0.72324	0.000732282	1.0959	0.0488698
ENSG00000168672.4	LRATD2	0.614617	0.000109288	1.02947	0.443959	0.628384	4.20934e-06
ENSG00000168675.19	LDLRAD4	0.567856	0.000304184	0.726949	0.00694248	0.778819	0.03315
ENSG00000168765.18	GSTM4	0.555654	0.000112363	0.690344	0.000597796	1.80959	6.08198e-05
ENSG00000168772.11	CXXC4	0.53245	6.0642e-05	0.807285	0.019157	0.862252	0.246348
ENSG00000168824.15	NSG1	0.629963	0.00694923	0.7006	0.0235009	1.61011	0.0027852
ENSG00000168874.13	ATOH8	0.502086	0.00248262	0.622677	0.0104052	1.5711	0.0108148
ENSG00000168916.16	ZNF608	0.512659	3.5192e-07	0.88402	0.00861004	0.952712	0.197744
ENSG00000168993.15	CPLX1	1.6339	0.023245	1.40028	0.0569748	0.910256	0.613874
ENSG00000169020.10	ATP5ME	1.53734	6.8602e-05	1.10398	0.0889832	1.0882	0.053925
ENSG00000169047.6	IRS1	0.390773	1.289e-05	0.75261	0.00196874	1.1688	0.0165836
ENSG00000169067.4	ACTBL2	1.66608	4.90669e-05	1.42682	0.000152633	1.82033	0.00060503
ENSG00000169105.8	CHST14	0.585619	1.34836e-05	0.611667	3.68134e-05	1.21514	0.00413731
ENSG00000169129.15	AFAP1L2	1.6716	0.000723263	1.41588	0.00537424	0.808883	0.0380284
ENSG00000169184.6	MN1	0.325049	1.50336e-06	0.725917	0.000302198	1.27219	0.00260978
ENSG00000169220.18	RGS14	2.64578	2.75625e-06	1.22482	0.23145	1.63583	0.00114763
ENSG00000169242.12	EFNA1	1.55969	0.000278386	1.11254	0.188624	1.37096	0.00433636
ENSG00000169247.14	SH3TC2	0.498333	0.00174302	0.851426	0.186017	0.991478	0.932723
ENSG00000169251.13	NMD3	1.50079	0.00105481	1.30683	0.00756304	1.11148	0.098346
ENSG00000169252.6	ADRB2	0.562596	0.000634908	0.854369	0.160006	1.31221	0.00644254
ENSG00000169271.3	HSPB3	12.8286	3.62241e-07	2.86064	0.000146475	0.735405	0.0802429
ENSG00000169302.16	STK32A	0.582963	0.0322179	1.00296	0.985218	0.599259	0.0362534
ENSG00000169429.11	CXCL8	3.0552	5.91182e-06	3.112	0.00198679	0.688	0.0601931
ENSG00000169436.17	COL22A1	1.81904	0.00264499	1.34909	0.142827	0.474679	0.00360098
ENSG00000169439.12	SDC2	0.660628	3.54205e-05	0.946154	0.269008	0.991991	0.824927
ENSG00000169499.15	PLEKHA2	0.44389	0.000472506	0.384926	0.000302731	1.04826	0.588865
ENSG00000169515.8	CCDC8	0.617395	0.00336512	0.845164	0.107733	0.893526	0.248569
ENSG00000169621.10	APLF	1.54225	0.00334101	1.25211	0.00147289	1.09155	0.124703
ENSG00000169683.8	LRRC45	0.541822	6.24056e-05	0.936286	0.338758	1.26019	0.0204849
ENSG00000169715.15	MT1E	0.555929	0.00112501	0.943972	0.52751	0.8753	0.179461
ENSG00000169738.8	DCXR	0.611979	4.78946e-05	0.974971	0.446424	1.06026	0.0931654
ENSG00000169750.9	RAC3	0.615915	0.0129585	0.774005	0.0928506	1.09284	0.56086
ENSG00000169760.17	NLGN1	0.558397	0.00285836	0.716113	0.0930979	0.86104	0.262585
ENSG00000169783.13	LINGO1	0.448488	0.000168451	0.665982	0.00442504	1.10919	0.218617
ENSG00000169814.16	BTD	0.624522	0.00234507	0.988174	0.83873	0.634261	0.00107243
ENSG00000169851.15	PCDH7	0.571188	0.000506767	0.53075	0.000223118	1.73083	0.000178805
ENSG00000169855.21	ROBO1	0.645787	0.00797086	0.901603	0.379566	1.20756	0.0517187
ENSG00000169871.13	TRIM56	0.575788	0.000228967	0.474146	9.83679e-05	1.10974	0.126345
ENSG00000170035.16	UBE2E3	0.664031	1.45514e-05	0.862525	0.00355922	0.910883	0.0546513
ENSG00000170074.19	FAM153A	0.629766	0.0297829	0.784748	0.119656	0.654367	0.0268551
ENSG00000170089.16	ENSG00000170089	0.583646	0.00276751	0.967837	0.715609	1.42175	0.00100229
ENSG00000170100.14	ZNF778	1.73794	0.00945775	1.27441	0.176696	0.562941	0.00206988
ENSG00000170153.11	RNF150	0.526614	2.17923e-05	1.21422	0.00623888	1.22775	0.0254081
ENSG00000170271.11	FAXDC2	0.484375	0.000709184	0.548828	0.00372811	0.962891	0.665508
ENSG00000170275.15	CRTAP	0.554696	2.33255e-06	0.869158	0.00177579	0.910374	0.0302301
ENSG00000170276.6	HSPB2	0.648528	0.0368642	1.03039	0.818191	0.922026	0.507784
ENSG00000170293.9	CMTM8	0.524309	0.000472417	0.825975	0.047438	0.950782	0.546722
ENSG00000170345.10	FOS	0.620429	0.00115663	0.74354	0.0332753	0.74549	0.0226171
ENSG00000170367.5	CST5	0.482542	0.0194268	1.30028	0.145237	0.389665	0.00922865
ENSG00000170381.14	SEMA3E	0.453712	0.000705921	0.912924	0.454695	2.24626	0.000583261
ENSG00000170421.13	KRT8	0.568478	8.77709e-06	0.851205	0.00323396	1.19396	0.00317433
ENSG00000170430.10	MGMT	1.66717	1.44967e-05	1.23426	0.00221446	0.94895	0.566414
ENSG00000170439.8	METTL7B	0.412581	0.000169585	0.456676	0.000257152	0.753932	0.0259803
ENSG00000170454.6	KRT75	0.270569	1.48032e-05	0.420813	7.64974e-05	1.18712	0.143994
ENSG00000170485.17	NPAS2	2.03048	0.000254656	1.31218	0.0127518	0.807871	0.0670563
ENSG00000170498.10	KISS1	0.465108	0.000280468	0.975401	0.798058	0.510816	0.00126729
ENSG00000170525.21	PFKFB3	1.51658	0.000701698	1.51315	0.000240391	1.18185	0.00170893
ENSG00000170579.17	DLGAP1	0.657343	0.0206812	0.76024	0.0751767	2.03197	0.0349597
ENSG00000170584.11	NUDCD2	0.644107	0.00335052	1.00747	0.855925	1.1663	0.00391162
ENSG00000170627.11	GTSF1	2.16755	1.25341e-06	2.15144	8.42164e-06	0.0248911	4.08801e-07
ENSG00000170667.15	RASA4B	0.549182	2.65324e-05	0.685549	0.000571605	1.18001	0.0295524
ENSG00000170837.3	GPR27	1.837	0.000171135	1.59129	3.05952e-05	1.06559	0.605566
ENSG00000170860.4	LSM3	0.541774	4.10264e-09	0.885363	0.00711997	0.63231	6.47309e-07
ENSG00000170955.10	CAVIN3	7.22976	1.73111e-06	0.936543	0.351632	1.84026	0.00905327
ENSG00000170961.7	HAS2	0.536744	0.000804758	1.10977	0.175245	0.699535	0.00936137
ENSG00000170965.10	PLAC1	0.48189	0.00022996	0.546378	0.00116521	1.13251	0.537868
ENSG00000171017.11	LRRC8E	1.70855	0.00119429	1.05889	0.662821	1.12528	0.217506
ENSG00000171132.14	PRKCE	1.64271	0.00411857	1.20598	0.246671	0.726616	0.0799576
ENSG00000171148.14	TADA3	0.566512	3.67953e-07	0.900817	0.000666373	0.579746	9.11028e-07
ENSG00000171223.6	JUNB	1.57322	8.91737e-05	1.16642	0.00609275	0.85572	0.0190672
ENSG00000171224.9	FAM241B	1.58427	0.000160063	1.18401	0.0135033	1.22839	0.00556672
ENSG00000171227.7	TMEM37	0.643886	0.00162698	1.35889	0.00247182	0.951431	0.625038
ENSG00000171243.8	SOSTDC1	0.486618	0.00269428	0.513382	0.00374083	2.0146	0.000444364
ENSG00000171310.11	CHST11	1.74048	0.00189051	1.33426	0.031545	0.886258	0.167605
ENSG00000171320.15	ESCO2	0.406871	1.40164e-06	0.582538	7.31102e-05	0.42011	3.53301e-06
ENSG00000171346.16	KRT15	0.324741	0.0113419	0.240424	0.00660719	0.744881	0.227027
ENSG00000171368.12	TPPP	0.392123	2.57683e-05	0.662671	0.00136872	1.58904	0.000138837
ENSG00000171385.10	KCND3	0.339093	0.00424987	0.615983	0.0675339	0.8527	0.451071
ENSG00000171453.20	POLR1C	1.88708	1.19778e-05	1.37412	0.000300622	0.947169	0.369126
ENSG00000171530.15	TBCA	1.57304	9.47127e-05	1.40868	0.000454109	1.07431	0.167395
ENSG00000171604.12	CXXC5	0.476491	5.65886e-05	0.773222	0.00915662	1.70786	2.67283e-05
ENSG00000171608.17	PIK3CD	1.79186	0.000864125	1.61472	0.00332179	0.938226	0.442602
ENSG00000171634.19	BPTF	0.592725	0.000157905	0.887681	0.0512862	0.998913	0.982449
ENSG00000171649.12	ZIK1	0.66468	0.00930169	0.823402	0.164954	1.29632	0.0224069
ENSG00000171724.3	VAT1L	0.577532	0.000441938	1.0443	0.510793	0.629295	0.00252554
ENSG00000171729.14	TMEM51	1.57741	8.06866e-06	1.03649	0.620432	1.04778	0.169149
ENSG00000171792.11	RHNO1	0.500812	4.85442e-05	0.751949	0.000607055	1.00484	0.92491
ENSG00000171840.13	NINJ2	0.446207	0.023206	1.41172	0.116926	0.843448	0.435605
ENSG00000171860.5	C3AR1	2.78881	0.000119411	2.13899	0.00300233	0.889892	0.291983
ENSG00000172046.20	USP19	0.385319	1.76432e-06	0.962411	0.28187	1.13447	0.0238062
ENSG00000172053.18	QARS1	0.636797	0.000114704	0.972129	0.559581	1.08501	0.0888258
ENSG00000172059.11	KLF11	1.50474	0.000135884	1.08987	0.148681	1.43648	0.000574925
ENSG00000172061.9	LRRC15	0.383659	4.88658e-05	0.83659	0.0326143	0.473801	0.000105104
ENSG00000172073.4	TEX37	2.60891	0.000136916	0.583737	0.0434944	1.72701	0.0191721
ENSG00000172137.19	CALB2	1.60458	1.27135e-07	1.40499	8.15691e-07	0.428908	2.5759e-07
ENSG00000172201.12	ID4	0.578631	0.00327759	0.788715	0.102075	1.79952	0.00149245
ENSG00000172260.15	NEGR1	1.61628	0.00548184	1.44025	0.00198214	1.15628	0.195646
ENSG00000172264.18	MACROD2	1.64311	0.00207849	1.10012	0.491776	1.05889	0.505776
ENSG00000172296.13	SPTLC3	0.574457	0.00832997	0.96122	0.810858	0.749224	0.0419612
ENSG00000172346.15	CSDC2	1.63195	2.16952e-06	1.17361	0.00120395	1.16073	0.00473045
ENSG00000172348.16	RCAN2	1.8288	0.000511181	1.1447	0.100558	0.968071	0.665727
ENSG00000172478.18	MAB21L4	0.533923	0.000316141	0.497788	0.000342886	0.937316	0.408626
ENSG00000172493.23	AFF1	1.59017	0.000129721	1.15401	0.0591091	0.984477	0.824691
ENSG00000172594.13	SMPDL3A	1.61739	0.000676386	1.11236	0.0862592	1.09876	0.323222
ENSG00000172638.13	EFEMP2	0.536795	9.01432e-08	0.667489	1.31305e-05	0.933611	0.0156528
ENSG00000172794.20	RAB37	1.99247	0.000149739	1.41172	0.0286324	0.738075	0.0143037
ENSG00000172819.17	RARG	0.512351	5.03634e-05	0.823598	0.00724634	1.05703	0.267534
ENSG00000172927.9	MYEOV	1.56562	6.15598e-06	1.26555	2.0323e-05	1.13042	0.00188911
ENSG00000172936.16	MYD88	0.636119	5.28072e-05	1.03003	0.457991	1.28109	0.000131396
ENSG00000173145.11	NOC3L	1.59733	0.000448329	1.48908	0.00072	0.808252	0.0450457
ENSG00000173153.17	ESRRA	1.71694	6.63593e-06	1.30666	9.09605e-05	1.12128	0.0404499
ENSG00000173221.14	GLRX	1.95397	3.15515e-05	1.4609	0.000207636	1.07762	0.446436
ENSG00000173391.9	OLR1	2.64968	0.00419365	1.34183	0.0372859	2.65287	0.000223693
ENSG00000173402.12	DAG1	0.5749	1.25574e-06	0.986515	0.548172	0.874333	0.00277939
ENSG00000173406.16	DAB1	0.601675	0.00100282	1.21053	0.058743	1.11244	0.236674
ENSG00000173432.13	SAA1	4.10398	0.000267805	1.2906	0.470611	0.275537	0.0908372
ENSG00000173473.11	SMARCC1	0.575556	0.000653479	1.02364	0.724689	0.896878	0.143047
ENSG00000173531.16	MST1	0.42719	0.00178409	0.695862	0.0504072	0.799033	0.159863
ENSG00000173540.14	GMPPB	0.643162	0.00016778	0.945052	0.28175	1.06486	0.142968
ENSG00000173559.15	NABP1	1.9074	1.90188e-05	1.46581	6.95515e-05	0.740468	0.000504022
ENSG00000173581.8	CCDC106	0.554079	0.000259409	0.725005	0.00111158	1.68882	0.000455052
ENSG00000173611.18	SCAI	0.644595	0.0133164	0.812162	0.116057	0.813514	0.182387
ENSG00000173641.18	HSPB7	2.41558	8.59645e-05	2.79457	3.91344e-06	0.626919	0.00123267
ENSG00000173727.13	ENSG00000173727	4.70375	2.39465e-05	2.03214	0.0126871	0.701689	0.0724733
ENSG00000173846.13	PLK3	2.13606	1.14327e-05	1.12418	0.238043	1.37015	0.0039786
ENSG00000173852.16	DPY19L1	0.629272	0.000394663	0.806534	0.0578963	0.953072	0.576007
ENSG00000173894.11	CBX2	0.502346	1.12736e-06	0.901842	0.04969	1.05058	0.129281
ENSG00000174059.17	CD34	0.253019	1.79213e-07	0.617754	0.00203958	0.727959	0.000349633
ENSG00000174080.12	CTSF	1.65058	8.2927e-07	1.4449	6.78374e-05	0.750729	2.98509e-05
ENSG00000174130.12	TLR6	1.54951	4.06305e-05	0.864701	0.024229	0.648526	0.000247989
ENSG00000174132.9	FAM174A	1.72036	3.53471e-06	1.60861	0.000713257	1.13617	0.0400161
ENSG00000174306.22	ZHX3	1.94447	6.28028e-05	1.41551	0.00672899	1.16778	0.084304
ENSG00000174428.19	GTF2IRD2B	0.652945	0.0375727	0.815323	0.203471	1.01589	0.938448
ENSG00000174469.23	CNTNAP2	0.53584	0.000736099	0.742356	0.00756698	1.18947	0.0662518
ENSG00000174640.15	SLCO2A1	0.479123	0.000197363	0.727119	0.0175275	0.590046	0.000469079
ENSG00000174718.12	RESF1	1.50503	0.0237745	1.00513	0.972968	0.893867	0.469905
ENSG00000174738.13	NR1D2	0.647397	0.00298168	1.1974	0.0282426	0.437598	0.000230772
ENSG00000174792.11	ODAPH	11.3201	1.11286e-06	3.70061	2.87671e-05	0.421133	0.00876934
ENSG00000174837.15	ADGRE1	3.64286	4.01059e-07	1.38571	0.00501408	0.8125	0.0265775
ENSG00000174951.12	FUT1	0.616194	0.00307149	1.04696	0.720383	0.451822	0.000467433
ENSG00000175093.5	SPSB4	0.655976	2.53828e-06	0.701215	8.12761e-05	0.850439	0.0140066
ENSG00000175130.7	MARCKSL1	0.462192	4.98017e-09	0.80356	6.86204e-07	1.10486	0.00011252
ENSG00000175182.15	FAM131A	1.69923	9.85442e-05	1.0088	0.900723	1.37355	0.00239252
ENSG00000175183.10	CSRP2	0.491242	0.000158854	0.725492	0.00381585	0.884012	0.0911374
ENSG00000175197.13	DDIT3	1.81009	6.06953e-05	1.39053	0.00543583	1.03194	0.707685
ENSG00000175220.12	ARHGAP1	1.71105	2.18151e-06	1.14882	0.00613712	0.915046	0.0263952
ENSG00000175224.17	ATG13	1.58401	8.60819e-06	1.19696	0.00206056	1.0434	0.318605
ENSG00000175287.19	PHYHD1	0.199459	1.36424e-05	0.178199	6.4989e-06	0.169308	6.16982e-06
ENSG00000175305.18	CCNE2	0.643079	0.014433	0.655115	0.0102199	0.95497	0.657255
ENSG00000175322.12	ZNF519	0.480225	0.00162376	0.577104	0.00369695	0.959361	0.69356
ENSG00000175352.11	NRIP3	1.68741	0.000360165	1.62656	0.00208429	1.04033	0.697994
ENSG00000175354.20	PTPN2	0.661403	0.000405783	0.647023	1.77538e-05	1.27431	0.00317112
ENSG00000175416.16	CLTB	2.18323	1.66361e-06	1.23546	0.000118984	1.15889	0.00313747
ENSG00000175445.17	LPL	0.322107	0.00013065	0.81232	0.117191	1.27202	0.0464847
ENSG00000175471.20	MCTP1	1.6226	0.0247174	1.11933	0.313479	0.921949	0.580798
ENSG00000175567.11	UCP2	0.563982	0.000162901	0.828246	0.0200026	0.80757	0.0401507
ENSG00000175592.9	FOSL1	2.32523	1.82983e-07	1.32662	0.00108343	1.11824	0.223055
ENSG00000175643.10	RMI2	0.444804	3.90677e-06	0.565852	1.78625e-05	1.07441	0.227726
ENSG00000176020.9	AMIGO3	0.560759	7.0699e-05	0.85952	0.0635533	1.06889	0.248489
ENSG00000176049.16	JAKMIP2	0.650383	0.00255049	0.929076	0.537894	0.622425	0.000155282
ENSG00000176105.14	YES1	0.62272	1.91947e-05	0.781905	0.000383689	1.154	0.00339805
ENSG00000176170.14	SPHK1	1.80091	4.98613e-05	1.04287	0.693276	1.13603	0.20601
ENSG00000176209.12	SMIM19	0.564217	0.000570751	0.587222	0.0010147	1.05548	0.449408
ENSG00000176222.9	ZNF404	0.426281	4.55901e-05	0.790081	0.0227166	1.22775	0.0113174
ENSG00000176244.7	ACBD7	0.414736	2.79606e-05	0.76915	0.00788655	0.966395	0.623753
ENSG00000176531.11	PHLDB3	1.61607	3.19378e-05	1.14521	0.13029	1.35091	0.0183635
ENSG00000176533.13	GNG7	0.569033	1.44897e-06	0.903666	0.119648	0.896646	0.0047384
ENSG00000176658.17	MYO1D	1.75602	0.000105877	1.54844	0.0018939	0.81263	0.0495938
ENSG00000176659.10	LINC02910	2.77727	7.9752e-05	1.57562	0.00869676	0.866178	0.201592
ENSG00000176732.7	PFN4	0.611459	0.000392508	0.781558	0.00608027	0.662489	0.00350172
ENSG00000176797.4	DEFB103A	18.6364	0.000139159	1.23398	0.443036	1.15499	0.674102
ENSG00000176845.13	METRNL	0.540921	3.04542e-05	1.01739	0.675001	1.19266	0.0058701
ENSG00000176890.16	TYMS	0.555147	1.78035e-08	0.627905	8.51395e-09	1.2017	2.54465e-07
ENSG00000176974.21	SHMT1	0.658481	3.24326e-05	1.05732	0.217902	1.20524	0.00165308
ENSG00000176998.4	HCG4	2.67391	6.60889e-05	1.17019	0.164932	0.896894	0.444986
ENSG00000177045.11	SIX5	0.628604	0.000255811	0.809685	0.0201935	1.11149	0.0964145
ENSG00000177058.12	SLC38A9	1.76425	0.00502007	1.37694	0.00412947	0.96114	0.665557
ENSG00000177352.10	CCDC71	0.662091	3.41327e-07	0.775067	2.06674e-05	0.916984	0.0827216
ENSG00000177359.21	ENSG00000177359	0.559176	0.00094071	0.771906	0.0417289	0.826439	0.0767954
ENSG00000177426.22	TGIF1	0.646754	2.39441e-05	0.881121	0.00575954	1.25468	0.000312385
ENSG00000177427.13	MIEF2	1.50531	2.0783e-05	1.0172	0.65295	1.2002	0.000852094
ENSG00000177464.5	GPR4	0.508237	6.84485e-06	0.790774	0.0104067	0.649094	0.000465749
ENSG00000177542.11	SLC25A22	1.8556	9.42391e-07	1.18277	0.0810855	1.22083	0.0092393
ENSG00000177570.15	SAMD12	1.563	0.000503619	1.32032	0.0109008	0.966483	0.578625
ENSG00000177602.5	HASPIN	0.659019	0.000281959	0.785014	0.00199808	0.925439	0.163765
ENSG00000177614.11	PGBD5	1.54021	0.00243419	1.00536	0.940982	1.17359	0.0552773
ENSG00000177689.10	MAGEB10	7.15033	1.55318e-06	0.945534	0.229306	0.87146	0.00296422
ENSG00000177707.11	NECTIN3	0.564653	0.00908575	0.804148	0.144802	0.818756	0.141305
ENSG00000177839.7	PCDHB9	1.99285	0.00213727	1.02622	0.910154	1.17282	0.381558
ENSG00000177842.12	ZNF620	0.662167	0.0198503	0.799025	0.0665904	1.07574	0.417359
ENSG00000177873.14	ZNF619	0.51769	0.00184152	0.739854	0.0223812	0.840271	0.138698
ENSG00000177875.5	CCDC184	1.63703	3.81261e-06	1.07154	0.308563	1.10258	0.107846
ENSG00000177917.12	ARL6IP6	0.643777	1.63924e-06	0.883655	0.000725555	1.01573	0.448473
ENSG00000178026.13	LRRC75B	0.388515	0.000238713	0.407443	0.000175075	0.743985	0.0419559
ENSG00000178035.13	IMPDH2	0.630445	5.26675e-08	0.921944	0.00345418	0.866982	2.39885e-05
ENSG00000178038.17	ALS2CL	1.95471	9.94228e-06	1.19211	0.0361211	1.07889	0.445045
ENSG00000178057.15	NDUFAF3	0.525023	2.7543e-06	0.798844	0.00107486	1.03639	0.332927
ENSG00000178082.6	TWF1P1	1.52036	0.0394998	1.32272	0.101332	1.04367	0.800064
ENSG00000178149.17	DALRD3	0.62532	0.000488751	0.826145	0.0515007	1.11234	0.192067
ENSG00000178150.10	ZNF114	4.91665	4.37837e-06	1.7741	0.00167787	0.6569	0.00447425
ENSG00000178187.8	ZNF454	1.53995	0.00014476	1.24576	0.0469848	0.935835	0.541228
ENSG00000178401.16	DNAJC22	0.270872	1.90148e-05	0.573405	0.00136997	0.715994	0.0110153
ENSG00000178538.10	CA8	0.59699	0.000165727	1.11622	0.0385933	0.541806	0.000607183
ENSG00000178567.8	EPM2AIP1	0.544064	0.0046454	0.907502	0.25992	0.755098	0.0101081
ENSG00000178605.13	GTPBP6	0.563558	7.58174e-07	0.612466	1.71049e-06	1.86938	2.45341e-06
ENSG00000178605.13	PAR_Y_GTPBP6	0.563558	7.58174e-07	0.612466	1.71049e-06	1.86938	2.45341e-06
ENSG00000178695.6	KCTD12	0.635135	0.000255536	0.661642	0.000397754	0.639293	0.000374635
ENSG00000178776.5	C5orf46	0.454946	0.000663814	0.783907	0.120217	1.08005	0.348356
ENSG00000178878.13	APOLD1	0.638727	0.000902105	0.674271	0.00242952	0.865782	0.0978459
ENSG00000178996.14	SNX18	1.51227	0.000650492	1.68714	3.9537e-05	0.947833	0.156131
ENSG00000179041.4	RRS1	1.6986	0.000581674	1.21736	0.00703155	1.11613	0.03873
ENSG00000179046.9	TRIML2	2.75653	0.000128075	0.627907	0.0148096	0.822854	0.214461
ENSG00000179094.16	PER1	0.48755	0.0128395	0.700976	0.145173	0.648679	0.145483
ENSG00000179134.16	SAMD4B	1.51307	0.00012859	1.32094	0.000525403	1.06108	0.183896
ENSG00000179148.10	ALOXE3	3.04353	3.55199e-07	1.0064	0.943982	0.916773	0.615938
ENSG00000179542.16	SLITRK4	0.451366	0.00126596	0.682514	0.00991515	0.488525	0.000978736
ENSG00000179604.10	CDC42EP4	0.483292	9.32199e-09	0.887989	7.58026e-07	1.00137	0.916883
ENSG00000179674.4	ARL14	1.69785	0.0250241	0.949431	0.483978	0.792668	0.043474
ENSG00000179772.8	FOXS1	0.0616899	3.65741e-08	0.286134	3.01956e-07	0.467779	1.1116e-06
ENSG00000179841.8	AKAP5	0.664495	0.00055149	1.0241	0.626945	0.914007	0.121506
ENSG00000179869.15	ABCA13	0.358159	9.66245e-06	0.539671	0.000144719	1.41766	0.0021503
ENSG00000179981.11	TSHZ1	0.661433	0.000105421	0.889434	0.0352611	0.917566	0.0843866
ENSG00000180071.20	ANKRD18A	2.0102	0.0429455	1.54082	0.0951673	1.08673	0.696899
ENSG00000180096.13	SEPTIN1	0.547619	0.00222125	0.637955	0.00300239	0.938375	0.539413
ENSG00000180104.16	EXOC3	0.357825	3.79363e-06	0.670604	0.000134028	1.4071	4.10539e-05
ENSG00000180287.17	PLD5	0.425117	0.00535105	0.644172	0.0492489	0.947131	0.7387
ENSG00000180340.7	FZD2	0.626204	2.56054e-05	0.812755	0.00159289	0.891193	0.0523906
ENSG00000180385.9	EMC3-AS1	0.53537	0.00707466	0.785785	0.136076	0.807373	0.214117
ENSG00000180573.10	H2AC6	0.170627	2.28102e-09	0.17487	1.81673e-09	0.835422	0.0024443
ENSG00000180596.8	H2BC4	0.192521	9.64485e-05	0.169271	7.62022e-05	0.619108	0.00462504
ENSG00000180616.9	SSTR2	0.610647	8.71524e-06	0.926931	0.0594793	0.960334	0.299754
ENSG00000180720.8	CHRM4	0.568583	0.000187713	0.710729	0.000557025	0.70756	0.00485089
ENSG00000180739.15	S1PR5	0.479191	0.000403452	0.58963	0.00499293	0.85701	0.269529
ENSG00000180921.7	FAM83H	1.71228	3.69922e-07	1.14823	0.000348043	1.02899	0.101596
ENSG00000180998.12	GPR137C	0.60147	7.84834e-05	0.780441	0.00469731	0.846277	0.0586885
ENSG00000181104.7	F2R	1.8905	7.15174e-07	2.03568	2.77499e-07	1.59507	5.97379e-07
ENSG00000181126.13	HLA-V	3.32907	6.23934e-06	1.02561	0.787882	0.6863	0.0131379
ENSG00000181350.12	LRRC75A	0.634778	0.000124976	0.725959	0.0097113	0.966119	0.720226
ENSG00000181396.13	OGFOD3	0.640924	0.000187047	1.09611	0.120038	0.940368	0.112605
ENSG00000181449.4	SOX2	0.12128	3.44942e-05	0.341349	0.000195045	1.11107	0.244959
ENSG00000181450.18	ZNF678	0.653683	0.00594247	0.83764	0.106268	1.01427	0.922985
ENSG00000181523.13	SGSH	1.54144	0.00148804	0.95892	0.762188	1.35897	0.0165819
ENSG00000181555.22	SETD2	0.633356	4.71031e-08	0.985642	0.471335	0.995436	0.887383
ENSG00000181649.8	PHLDA2	2.66417	1.68571e-05	1.65416	0.000563775	1.66802	0.00116427
ENSG00000181790.12	ADGRB1	0.556279	0.000119245	0.43406	3.0411e-05	0.821239	0.00835809
ENSG00000181827.16	RFX7	0.662489	0.000200739	0.848478	0.00955494	0.969561	0.402899
ENSG00000181830.9	SLC35C1	1.71463	1.15289e-05	1.22405	0.00338726	1.03349	0.324431
ENSG00000182010.11	RTKN2	0.607903	0.000302549	0.838107	0.0202102	0.994027	0.925909
ENSG00000182022.18	CHST15	3.32668	0.000900973	3.16405	0.00201385	0.617689	0.000142918
ENSG00000182054.10	IDH2	0.444676	8.40274e-08	0.591112	1.27868e-05	1.00728	0.821452
ENSG00000182158.16	CREB3L2	0.656463	0.000298971	0.983722	0.730581	0.794947	0.00315586
ENSG00000182175.15	RGMA	0.424937	8.16827e-06	0.713556	0.0028438	0.881509	0.0384552
ENSG00000182326.16	C1S	2.75767	0.00230983	0.89828	0.42827	0.685116	0.0195665
ENSG00000182359.15	KBTBD3	1.64968	0.0113987	1.04171	0.842331	1.04588	0.853126
ENSG00000182372.10	CLN8	1.80729	0.000726007	1.24353	0.0231842	1.11409	0.278696
ENSG00000182378.15	PLCXD1	0.461458	0.000144983	0.66216	0.00354446	1.73183	4.39329e-05
ENSG00000182378.15	PAR_Y_PLCXD1	0.461458	0.000144983	0.66216	0.00354446	1.73183	4.39329e-05
ENSG00000182504.11	CEP97	0.631639	0.000353579	0.836379	0.0264899	1.02284	0.786788
ENSG00000182568.17	SATB1	0.646701	0.000358474	1.07986	0.504557	0.729987	0.012845
ENSG00000182580.3	EPHB3	0.539717	0.00319674	0.926149	0.535387	0.851438	0.265245
ENSG00000182600.9	SNORC	1.84993	0.0120538	1.57223	0.14461	2.49509	0.00954161
ENSG00000182612.10	TSPAN10	2.26151	2.6799e-05	1.09046	0.328778	0.760197	0.0169404
ENSG00000182648.14	LINC01006	5.96078	0.000126351	0.997549	0.928115	1.05392	0.505174
ENSG00000182667.15	NTM	0.466865	0.000548237	0.914849	0.358828	1.60285	0.000504273
ENSG00000182866.17	LCK	0.460611	0.00469269	0.548232	0.0154181	0.805466	0.246881
ENSG00000182871.16	COL18A1	0.533144	0.00526414	0.911238	0.465023	0.338549	0.000636899
ENSG00000182873.5	PRKCZ-AS1	0.639381	0.002339	0.964602	0.806576	0.611357	0.00389493
ENSG00000182983.15	ZNF662	0.512407	7.75117e-08	0.878412	0.0131321	0.829198	0.00377223
ENSG00000183048.12	SLC25A10	0.519444	6.30391e-06	0.925176	0.077827	1.11913	0.0115634
ENSG00000183186.8	C2CD4C	0.652243	5.00827e-05	0.74059	0.000568225	1.18887	0.00674129
ENSG00000183248.12	PRR36	0.349953	4.98717e-06	0.586305	0.000146964	1.14453	0.0461341
ENSG00000183250.13	LINC01547	0.657277	0.0143379	0.7277	0.0349668	0.503912	0.00283256
ENSG00000183305.14	MAGEA2B	1.54085	0.0269123	1.1662	0.487871	1.06761	0.730887
ENSG00000183323.13	CCDC125	1.60382	0.00262348	1.55083	0.00582572	0.998262	0.98955
ENSG00000183474.16	GTF2H2C	1.6033	9.67753e-05	1.59382	0.000544211	1.08256	0.138906
ENSG00000183625.16	CCR3	0.540247	0.00437527	0.870921	0.420206	0.720087	0.0606961
ENSG00000183668.18	PSG9	4.18612	7.11826e-07	2.01157	0.000177704	0.880126	0.0907828
ENSG00000183691.6	NOG	1.80936	3.69736e-05	1.08821	0.0917748	1.00695	0.829585
ENSG00000183762.13	KREMEN1	0.643671	0.000266574	0.800633	0.00295555	1.10127	0.0492963
ENSG00000183763.9	TRAIP	0.460886	1.43581e-06	0.974631	0.499491	0.936906	0.131615
ENSG00000183765.23	CHEK2	0.632861	0.0109698	0.834749	0.198423	0.806263	0.102729
ENSG00000183779.7	ZNF703	0.395212	1.32332e-06	0.638119	6.96495e-05	1.41558	0.000494205
ENSG00000183828.15	NUDT14	1.52491	0.000560399	1.06657	0.42593	1.54668	0.00906811
ENSG00000183840.7	GPR39	1.70758	4.53986e-07	1.04893	0.143028	0.996889	0.940233
ENSG00000183935.5	HTR7P1	0.561845	2.65931e-06	0.735325	8.27759e-05	1.29717	0.0033765
ENSG00000183963.19	SMTN	0.60487	5.87021e-05	0.902337	0.0891228	1.05289	0.228119
ENSG00000183971.10	NPW	0.212382	3.40335e-05	0.346088	0.00013095	0.171969	1.98507e-05
ENSG00000184060.11	ADAP2	1.62831	0.00202021	1.48677	0.00774488	1.38665	0.00461798
ENSG00000184156.17	KCNQ3	2.21602	5.7851e-07	1.46422	0.00246958	0.695995	0.000351092
ENSG00000184163.3	C1QTNF12	0.446614	3.30923e-06	0.397046	0.000111443	0.81437	0.0218628
ENSG00000184260.6	H2AC20	0.521358	0.00307888	0.949768	0.591549	1.13504	0.276834
ENSG00000184384.14	MAML2	0.550532	3.47215e-05	0.880319	0.171597	0.864362	0.0153541
ENSG00000184445.12	KNTC1	0.646834	0.00219287	0.865134	0.0686592	1.11578	0.118577
ENSG00000184489.13	PTP4A3	3.01799	8.07905e-06	1.39862	0.000418974	1.14279	0.197304
ENSG00000184500.16	PROS1	2.00239	2.3896e-05	1.10045	0.260713	0.51734	0.00128267
ENSG00000184517.12	ZFP1	1.50821	0.00840797	1.25283	0.187253	1.02334	0.79835
ENSG00000184557.4	SOCS3	0.617152	0.000357258	1.00195	0.973107	0.951426	0.382127
ENSG00000184574.10	LPAR5	1.83171	0.000238213	1.02398	0.77219	1.26341	0.00359487
ENSG00000184584.13	STING1	3.22974	9.23901e-06	1.03732	0.828717	1.54927	0.0301359
ENSG00000184588.18	PDE4B	0.512648	0.00104525	0.934233	0.72595	1.69815	0.0656225
ENSG00000184613.11	NELL2	0.623028	0.0342753	1.05345	0.689569	0.595244	0.0150607
ENSG00000184675.11	AMER1	0.657525	1.7603e-05	0.885156	0.035421	0.982859	0.584782
ENSG00000184678.11	H2BC21	0.390684	6.50711e-07	0.35598	4.97532e-07	0.934325	0.119056
ENSG00000184792.16	OSBP2	1.65327	0.00105396	1.10487	0.331681	1.11504	0.337022
ENSG00000184838.15	PRR16	0.127913	6.30488e-06	0.608003	0.00156601	0.752532	0.00809933
ENSG00000184845.4	DRD1	0.262112	0.000192056	0.687578	0.0180435	1.84876	0.000165094
ENSG00000185022.12	MAFF	1.64823	8.50815e-05	0.99644	0.96251	0.985996	0.846701
ENSG00000185065.6	ENSG00000185065	0.590202	0.003894	0.747278	0.0436436	0.958009	0.662727
ENSG00000185187.13	SIGIRR	1.88458	0.00120323	1.19765	0.147314	0.705762	0.0308612
ENSG00000185219.18	ZNF445	0.582412	4.18763e-07	0.916237	0.000217453	1.04225	0.254302
ENSG00000185262.9	UBALD2	0.570072	0.00010726	0.991441	0.916313	0.791044	0.0242674
ENSG00000185338.7	SOCS1	0.30333	0.000209021	0.592356	0.00451517	0.960094	0.804496
ENSG00000185340.15	GAS2L1	0.617669	3.11771e-07	0.796448	1.40406e-05	1.26277	0.000123938
ENSG00000185432.12	METTL7A	0.186202	0.00129617	0.470864	0.0110619	0.491293	0.0196012
ENSG00000185483.13	ROR1	0.334975	1.22807e-05	0.935755	0.404491	0.715928	0.003218
ENSG00000185565.12	LSAMP	0.577836	0.0196933	0.864556	0.395645	1.25945	0.09247
ENSG00000185567.7	AHNAK2	1.99413	1.2047e-07	1.0463	0.176315	1.29046	9.44103e-05
ENSG00000185585.20	OLFML2A	0.476959	2.46677e-05	0.743994	0.00228292	1.11816	0.134042
ENSG00000185630.19	PBX1	0.5743	0.00196953	0.903998	0.245862	1.0263	0.824285
ENSG00000185650.10	ZFP36L1	2.02675	1.02474e-05	1.11017	0.113672	0.622118	0.000654551
ENSG00000185686.18	PRAME	0.641205	1.12037e-06	0.763024	5.37561e-06	1.07408	0.00304582
ENSG00000185875.13	THNSL1	0.642124	0.00451595	0.730235	0.00256726	0.852746	0.0206248
ENSG00000185904.12	LINC00839	1.65291	5.83171e-06	1.2312	0.00402937	0.872603	0.0395171
ENSG00000185920.18	PTCH1	0.524249	0.0121004	0.658031	0.0387941	1.19795	0.177796
ENSG00000185963.14	BICD2	1.72319	1.4678e-05	1.21171	0.00141052	0.989075	0.778712
ENSG00000186007.10	LEMD1	0.265861	5.58018e-05	0.477006	0.000279373	0.525008	0.00181575
ENSG00000186081.12	KRT5	0.454712	0.0143074	1.40714	0.216864	0.4172	0.00906971
ENSG00000186191.9	BPIFB4	1.76846	0.00410203	0.781437	0.142372	0.92016	0.672541
ENSG00000186193.9	SAPCD2	0.630197	1.9823e-06	1.18452	0.00300331	1.07854	0.0711819
ENSG00000186205.13	MTARC1	0.514126	0.00673732	0.850853	0.253533	1.17282	0.227945
ENSG00000186260.17	MRTFB	0.650336	0.000253036	0.8803	0.146104	1.03438	0.593849
ENSG00000186281.13	GPAT2	0.201068	1.85103e-07	0.196212	1.70308e-07	4.78776	4.56388e-07
ENSG00000186297.12	GABRA5	2.02467	1.15971e-06	1.53683	0.000164615	0.646105	0.00435838
ENSG00000186451.2	SPATA12	1.90091	0.00021502	1.03189	0.68267	1.05125	0.405228
ENSG00000186468.13	RPS23	1.6263	7.72772e-09	1.36489	4.34085e-07	0.98035	0.28428
ENSG00000186472.20	PCLO	0.649347	4.94426e-05	0.745139	0.000323828	2.13627	1.64455e-07
ENSG00000186594.15	MIR22HG	1.78045	0.000137729	1.4179	0.000298861	0.868787	0.0375949
ENSG00000186615.12	KTN1-AS1	0.616259	0.00218822	0.72028	0.00910523	0.855769	0.0746507
ENSG00000186642.16	PDE2A	1.85588	0.00195722	1.20307	0.325825	1.26678	0.212211
ENSG00000186684.14	CYP27C1	1.60843	0.00753549	1.43715	0.00225179	0.848066	0.126819
ENSG00000186716.21	BCR	3.0188	0.000140878	2.03083	0.00183015	1.04511	0.854798
ENSG00000186767.7	SPIN4	0.649886	0.00017067	0.921304	0.198597	0.909932	0.0746623
ENSG00000186815.13	TPCN1	2.02872	7.39879e-05	1.64752	0.000549637	0.708888	0.00312675
ENSG00000186847.6	KRT14	0.149242	6.24059e-05	1.40114	0.0193139	0.76572	0.0622781
ENSG00000186918.14	ZNF395	0.384934	5.89471e-05	0.508096	0.0001837	0.425165	0.00011771
ENSG00000186951.17	PPARA	1.57501	0.00432213	0.746975	0.00203884	1.0757	0.376684
ENSG00000186998.16	EMID1	0.529514	0.000423734	0.702629	0.0159401	0.978423	0.805468
ENSG00000187091.14	PLCD1	0.517987	2.2956e-05	0.766222	0.00761874	0.923456	0.265495
ENSG00000187123.15	LYPD6	0.608341	0.000446919	0.940556	0.184526	1.31352	0.00180433
ENSG00000187134.14	AKR1C1	1.88611	0.000695405	1.57407	0.00278537	0.65463	0.00604793
ENSG00000187193.9	MT1X	0.530347	0.000455078	1.04848	0.435378	0.869132	0.0879618
ENSG00000187210.14	GCNT1	0.576232	0.00658096	1.10553	0.176137	0.846538	0.270612
ENSG00000187231.14	SESTD1	0.637206	0.00120909	0.935066	0.353895	0.89932	0.14369
ENSG00000187244.12	BCAM	0.656693	1.36526e-07	0.695464	3.94627e-05	1.34607	1.33784e-05
ENSG00000187372.11	PCDHB13	2.58726	5.02176e-08	1.53278	4.98275e-05	0.996307	0.951378
ENSG00000187479.8	C11orf96	0.592807	7.13372e-05	0.78925	0.0145197	0.928461	0.413438
ENSG00000187534.6	PRR13P5	2.08291	0.00643194	1.99171	0.0611591	1.43048	0.0399487
ENSG00000187634.13	SAMD11	0.62425	0.00385322	0.869231	0.196557	0.997653	0.978298
ENSG00000187800.14	PEAR1	0.614862	0.0222673	0.371935	0.00182078	0.839306	0.26554
ENSG00000187837.4	H1-2	0.0966654	1.43346e-08	0.12324	1.84118e-08	0.757661	0.000143626
ENSG00000187987.10	ZSCAN23	0.659046	0.0475876	0.84324	0.483367	0.847812	0.368078
ENSG00000188002.11	ENSG00000188002	0.545807	0.000193987	0.676902	0.00117111	1.22203	0.00949837
ENSG00000188112.9	C6orf132	1.69575	0.00245493	1.08501	0.521561	0.917226	0.582141
ENSG00000188242.4	PP7080	0.418017	0.00146023	0.668099	0.0376773	1.3438	0.0318687
ENSG00000188293.6	IGFL1	2.8184	0.00810845	0.958282	0.678566	1.31779	0.0495351
ENSG00000188315.8	C3orf62	0.565449	0.0041961	0.71196	0.0776017	0.844186	0.480342
ENSG00000188322.8	SBK1	0.492389	2.70553e-05	0.87698	0.0594761	1.04846	0.402128
ENSG00000188372.15	ZP3	3.73731	4.47038e-06	1.57134	0.00383386	1.05075	0.625993
ENSG00000188428.20	BLOC1S5	0.632367	0.0031854	0.779226	0.0612888	1.01187	0.923693
ENSG00000188486.4	H2AX	0.580158	2.86213e-06	0.857264	0.00333749	1.26831	2.79385e-05
ENSG00000188501.11	LCTL	0.238496	2.79622e-05	0.717619	0.0144025	0.799648	0.0433422
ENSG00000188511.13	MIR3667HG	1.83623	0.000369411	0.657823	0.00112377	0.954864	0.456726
ENSG00000188549.13	CCDC9B	0.602897	4.09928e-05	0.619553	3.13112e-05	1.25806	0.000167265
ENSG00000188612.12	SUMO2	0.648545	6.24058e-05	0.997707	0.960454	1.07138	0.0598801
ENSG00000188624.3	IGFL3	1.70706	0.0270953	3.51687	0.000642867	0.653374	0.0794367
ENSG00000188706.13	ZDHHC9	1.56473	0.000128983	1.33029	0.00410341	1.039	0.575461
ENSG00000188760.11	TMEM198	1.50741	0.010687	1.0486	0.686824	0.629325	0.0339948
ENSG00000188818.13	ZDHHC11	0.558953	0.0376128	0.914524	0.594419	1.21496	0.19839
ENSG00000188878.20	FBF1	0.565066	0.000100084	0.886522	0.0818745	1.04861	0.58623
ENSG00000188910.8	GJB3	2.79582	1.76052e-06	1.22011	0.068997	0.863878	0.174798
ENSG00000189001.11	SBSN	1.6917	0.000713264	1.14238	0.258471	0.488789	0.00185005
ENSG00000189052.7	CGB5	2.69621	0.000371146	1.40693	0.108159	0.599517	0.108811
ENSG00000189057.11	FAM111B	0.660706	0.000554343	0.700602	0.00164866	1.0638	0.294682
ENSG00000189060.6	H1-0	0.445712	1.13181e-10	0.714786	2.88123e-09	1.03223	0.0127694
ENSG00000189064.9	GAGE2A	6.00521	7.26357e-07	4.92375	2.84496e-07	0.0797169	3.74445e-05
ENSG00000189129.14	PLAC9	0.428251	0.0210688	0.946749	0.824607	1.1861	0.519482
ENSG00000189184.12	PCDH18	0.405229	9.35511e-05	0.660725	0.00398684	1.19727	0.062929
ENSG00000189229.12	ENSG00000189229	0.540527	0.0109478	0.87817	0.358984	0.549478	0.0073392
ENSG00000189339.12	SLC35E2B	0.565949	1.02956e-06	0.750956	2.27273e-05	0.829199	0.000136319
ENSG00000189410.12	SH2D5	3.6065	2.74222e-07	1.87849	0.000141425	0.764931	0.043206
ENSG00000196116.8	TDRD7	1.61681	3.7911e-05	1.13133	0.0892315	1.23903	0.00303007
ENSG00000196154.12	S100A4	1.77694	0.000225545	1.90595	0.000243216	0.903709	0.187261
ENSG00000196159.14	FAT4	0.579264	1.10559e-06	0.634783	2.47047e-06	1.08763	0.247753
ENSG00000196196.3	HRCT1	0.383438	0.00133588	0.398469	0.00241497	0.775365	0.22902
ENSG00000196208.14	GREB1	2.65681	1.19739e-07	1.17067	0.08729	0.698706	0.00287893
ENSG00000196338.15	NLGN3	0.623629	0.00214617	0.702954	0.00475439	0.734177	0.00877572
ENSG00000196367.14	TRRAP	0.555256	1.47413e-06	0.7097	1.55054e-05	1.44337	5.76758e-06
ENSG00000196391.11	ZNF774	1.5646	0.0313373	1.30491	0.0309692	1.17571	0.40577
ENSG00000196396.10	PTPN1	1.68291	1.97545e-06	1.35615	9.81798e-06	0.954925	0.108116
ENSG00000196406.4	SPANXD	8.81664	3.31654e-06	1.81664	0.00465703	1.13752	0.54592
ENSG00000196411.10	EPHB4	0.586469	2.05426e-07	0.586817	1.3118e-07	1.22285	0.000241593
ENSG00000196502.13	SULT1A1	0.438014	3.02935e-05	0.694186	0.00673071	0.264667	4.71757e-06
ENSG00000196636.8	SDHAF3	0.619325	0.00034197	0.696319	0.00127655	1.47462	6.50819e-05
ENSG00000196747.5	H2AC13	0.59928	0.00526539	0.822016	0.193351	0.798354	0.0922752
ENSG00000196754.13	S100A2	0.633544	0.000518996	0.977085	0.717596	0.65726	0.00119615
ENSG00000196782.13	MAML3	0.609808	3.03298e-05	0.724236	0.000201968	1.31201	0.000111243
ENSG00000196866.3	H2AC7	0.231039	0.0107012	0.326909	0.0223479	0.819524	0.504102
ENSG00000196872.12	CRACDL	0.314239	0.00387153	0.389203	0.00899985	0.431872	0.0126426
ENSG00000196922.11	ZNF252P	0.638329	0.000818943	0.779896	0.0103944	0.745508	0.00544901
ENSG00000196954.14	CASP4	1.66071	3.17026e-05	1.03095	0.246992	0.983929	0.767332
ENSG00000196975.16	ANXA4	1.66643	0.000355822	1.03352	0.601313	1.06932	0.495713
ENSG00000196998.19	WDR45	1.74763	4.02313e-05	1.18038	0.0291231	0.720834	0.00340514
ENSG00000197106.7	SLC6A17	2.8672	7.38109e-05	1.5536	0.0211899	0.8832	0.0386942
ENSG00000197245.6	FAM110D	0.457261	3.51185e-05	0.909544	0.182776	1.06722	0.280666
ENSG00000197249.14	SERPINA1	0.388845	4.87698e-07	0.575312	5.69887e-06	0.689518	0.00372973
ENSG00000197256.11	KANK2	0.588032	4.41026e-05	0.706417	0.00014345	1.08751	0.0660152
ENSG00000197321.16	SVIL	0.623878	0.000411418	0.78638	0.00259277	0.840225	0.00975176
ENSG00000197375.14	SLC22A5	2.05168	0.000176084	1.19264	0.18265	0.825764	0.212841
ENSG00000197385.6	ZNF860	0.390794	0.000104596	0.881995	0.174547	0.779106	0.0383233
ENSG00000197409.8	H3C4	0.291801	0.0149156	0.422127	0.0409427	0.842463	0.503631
ENSG00000197410.14	DCHS2	0.314447	8.95502e-06	0.60845	0.00125073	1.80276	0.000182749
ENSG00000197496.6	SLC2A10	0.644948	0.00462085	0.736544	0.00149721	0.998741	0.988601
ENSG00000197555.10	SIPA1L1	0.584302	3.80535e-06	0.725619	9.1768e-05	0.79706	0.00108787
ENSG00000197614.11	MFAP5	1.84596	1.45596e-05	1.60517	1.79015e-06	0.0616563	4.06284e-08
ENSG00000197635.11	DPP4	3.04446	3.61338e-05	1.34874	0.0089181	0.734961	0.00296454
ENSG00000197769.6	MAP1LC3C	0.410626	0.00501787	0.398019	0.00547734	0.731652	0.135906
ENSG00000197780.11	TAF13	1.66222	0.000308288	1.28516	0.0441349	1.38792	0.00416597
ENSG00000197813.6	ENSG00000197813	0.562027	0.00351948	0.64826	0.0163438	0.6059	0.00702742
ENSG00000197837.4	H4-16	0.466417	0.0139951	0.561699	0.0236519	1.21993	0.313709
ENSG00000197860.10	SGTB	2.14881	9.75977e-05	1.97628	5.15678e-08	1.15421	0.0989474
ENSG00000197870.13	PRB3	0.647766	0.0155702	1.08591	0.568362	0.852234	0.494105
ENSG00000197872.11	CYRIA	3.2697	1.62792e-05	2.16981	1.44906e-05	0.665927	0.00267701
ENSG00000197892.13	KIF13B	0.524605	1.35789e-05	0.645543	0.00072142	0.467967	4.18934e-06
ENSG00000197903.8	H2BC12	0.236087	5.98631e-08	0.262763	8.66417e-08	0.755627	5.72963e-05
ENSG00000197989.15	SNHG12	1.59133	0.000313879	1.44435	0.000783986	1.00967	0.911183
ENSG00000198021.7	SPANXA1	4.77513	0.000408013	1.71985	0.00251403	0.91206	0.441313
ENSG00000198056.15	PRIM1	0.569092	7.91113e-05	0.907017	0.104683	0.990052	0.851191
ENSG00000198081.11	ZBTB14	0.58234	1.12639e-05	0.721762	0.000679665	0.877551	0.0473959
ENSG00000198157.11	HMGN5	0.645201	0.0268269	0.97904	0.886194	0.859351	0.291283
ENSG00000198205.7	ZXDA	1.81812	6.85368e-05	2.10886	9.26457e-06	0.832657	0.051397
ENSG00000198218.11	QRICH1	0.646581	0.000249505	0.983184	0.737076	1.03829	0.488752
ENSG00000198286.10	CARD11	1.94064	3.52768e-06	1.36517	0.000400517	1.28225	0.000570342
ENSG00000198298.13	ZNF485	1.74969	0.000943862	1.16918	0.205705	0.984906	0.877935
ENSG00000198300.14	PEG3	0.47596	0.000672915	0.625719	0.00556511	0.977456	0.81237
ENSG00000198324.14	PHETA1	1.68309	9.385e-05	1.38382	0.00126619	0.774563	0.0132374
ENSG00000198336.9	MYL4	2.31472	0.000715315	3.70897	2.32544e-05	0.306825	0.00201146
ENSG00000198431.17	TXNRD1	1.62925	0.000319351	1.51718	0.000480895	1.10821	0.136615
ENSG00000198455.5	ZXDB	1.59692	6.42848e-05	1.73344	1.14705e-05	1.03711	0.569198
ENSG00000198517.10	MAFK	1.8646	7.56732e-07	1.27861	0.000554604	1.29384	0.00133693
ENSG00000198554.12	WDHD1	0.432515	7.11868e-05	0.71655	0.00387984	0.741674	0.00645376
ENSG00000198573.7	SPANXC	31.2739	4.03111e-07	1.83131	0.00773657	1.28531	0.3435
ENSG00000198576.4	ARC	1.59986	1.85609e-05	0.910961	0.225033	1.13338	0.0675732
ENSG00000198598.7	MMP17	0.418697	7.24017e-05	0.408163	9.76554e-05	1.24556	0.0674413
ENSG00000198682.13	PAPSS2	1.57386	2.56835e-05	1.2561	0.00246791	0.831852	0.0137627
ENSG00000198715.13	GLMP	1.61946	0.00101402	1.25049	0.00789816	0.948888	0.437648
ENSG00000198722.15	UNC13B	1.51674	3.72317e-05	1.52379	8.99759e-06	0.798389	0.00271928
ENSG00000198732.11	SMOC1	0.217236	0.000112887	0.796725	0.11487	0.320006	0.000235442
ENSG00000198768.11	APCDD1L	2.08974	0.000161779	1.4359	0.00489565	0.660969	0.00288654
ENSG00000198830.11	HMGN2	0.590043	2.40522e-08	0.945129	0.00465151	1.11465	0.000269988
ENSG00000198835.4	GJC2	0.325	2.37518e-06	0.349528	1.10516e-05	1.44292	0.00021582
ENSG00000198894.8	CIPC	0.648401	0.00449335	0.775936	0.0373651	0.697153	0.0114685
ENSG00000198901.14	PRC1	0.645411	5.32893e-05	1.02198	0.601866	0.909612	0.0592711
ENSG00000198910.14	L1CAM	0.456644	1.96337e-05	0.895695	0.0666834	0.646112	0.00044542
ENSG00000198915.12	RASGEF1A	2.32541	3.00572e-05	1.6596	0.026524	0.385888	0.00143622
ENSG00000198937.9	CCDC167	1.50724	6.45006e-05	1.50742	2.64933e-05	0.966994	0.436788
ENSG00000198951.12	NAGA	0.623228	0.000327989	0.795468	0.00208796	0.946679	0.240549
ENSG00000203485.14	INF2	1.81005	4.69133e-06	1.22623	0.00431692	1.26126	0.00301261
ENSG00000203666.13	EFCAB2	0.624376	0.00540446	1.20777	0.109469	0.919815	0.462053
ENSG00000203721.8	LINC00862	2.68149	1.732e-07	1.47436	0.00028976	0.921349	0.049793
ENSG00000203780.12	FANK1	2.00523	8.54525e-05	1.45296	0.0159848	0.938153	0.688662
ENSG00000203852.4	H3C15	0.464697	0.00188379	0.48487	0.00403232	0.808718	0.186891
ENSG00000203883.7	SOX18	0.623934	0.00668381	0.772533	0.0570979	0.871498	0.147226
ENSG00000203926.5	SPANXA2	6.67472	0.00703758	1.46377	0.611597	0.721417	0.430412
ENSG00000203999.9	LINC01270	0.640419	0.000342739	0.59685	0.000262915	0.979725	0.7801
ENSG00000204054.14	LINC00963	1.50309	0.000177266	1.28366	0.00626027	0.974064	0.739869
ENSG00000204060.8	FOXO6	0.627806	6.02918e-05	0.897556	0.0353404	0.990196	0.892725
ENSG00000204262.14	COL5A2	0.534026	0.000135623	1.28715	0.0090691	0.191115	4.52421e-06
ENSG00000204264.12	PSMB8	1.64807	6.9838e-07	0.926658	0.0631385	1.23156	0.000438726
ENSG00000204301.6	NOTCH4	0.622871	0.000401256	0.780414	0.01036	1.11983	0.117761
ENSG00000204316.13	MRPL38	0.62784	3.10047e-06	0.998096	0.905402	0.982972	0.475387
ENSG00000204366.4	ZBTB12	0.574099	5.63777e-05	0.8208	0.00670647	1.06288	0.265555
ENSG00000204381.12	LAYN	2.37622	1.52493e-06	1.30015	0.00284795	1.24255	0.0364321
ENSG00000204386.12	NEU1	1.53715	3.5849e-05	1.41094	0.0004149	0.768008	0.00187916
ENSG00000204514.11	ZNF814	2.59304	0.000231392	1.66408	0.0116706	0.880873	0.536364
ENSG00000204519.11	ZNF551	0.538729	0.00186603	0.667404	0.0108469	1.08916	0.354169
ENSG00000204542.3	C6orf15	0.491697	8.22185e-05	1.5552	0.000655232	0.226446	7.27425e-06
ENSG00000204564.12	C6orf136	0.653482	0.0221738	1.16513	0.233472	1.1512	0.287027
ENSG00000204592.9	HLA-E	1.69989	2.89821e-08	1.04448	0.106718	1.14379	0.00143523
ENSG00000204682.8	MIR1915HG	0.639737	3.5557e-05	0.669211	2.46415e-05	1.21226	0.00641357
ENSG00000204941.14	PSG5	2.69304	0.000752902	2.02046	4.57418e-05	0.657572	0.00673172
ENSG00000205002.4	AARD	0.334345	1.94076e-05	0.536166	0.00147608	0.684623	0.00688333
ENSG00000205208.5	C4orf46	0.665818	0.000586394	0.763845	0.00304061	1.06976	0.211411
ENSG00000205212.6	CCDC144NL	0.329723	3.44115e-06	0.504117	1.1794e-05	1.16964	0.0736612
ENSG00000205213.14	LGR4	0.664768	0.00268468	1.07526	0.243702	1.06347	0.451596
ENSG00000205220.12	PSMB10	1.54053	0.000677599	1.02151	0.766747	1.16711	0.0447567
ENSG00000205268.11	PDE7A	0.475487	0.000605379	0.635937	0.00388772	0.713347	0.0125762
ENSG00000205307.12	SAP25	0.627797	0.0070452	0.951864	0.597596	1.55661	0.0120987
ENSG00000205325.4	ENSG00000205325	0.657143	0.0393963	0.884874	0.412716	1.23193	0.200202
ENSG00000205336.14	ADGRG1	0.348065	2.74621e-09	0.618904	2.33408e-05	0.323451	1.87551e-06
ENSG00000205426.11	KRT81	0.294857	1.12571e-06	0.808229	0.00284787	1.43719	4.12499e-05
ENSG00000205581.11	HMGN1	0.641434	1.76091e-05	0.964698	0.234299	1.05843	0.115854
ENSG00000205634.7	LINC00898	0.579686	1.98048e-05	0.706854	0.000410382	0.872832	0.0206357
ENSG00000205659.12	LIN52	0.633249	0.000474382	0.72692	0.00308139	0.931477	0.310862
ENSG00000205702.12	CYP2D7	0.637128	0.00634492	0.760026	0.114193	0.859638	0.176116
ENSG00000205978.6	NYNRIN	0.469082	2.50103e-08	0.876651	0.00230105	0.888728	0.000229898
ENSG00000206052.11	DOK6	1.54742	0.000980578	1.09068	0.406674	0.826955	0.452183
ENSG00000206075.14	SERPINB5	4.58656	2.90116e-05	1.11405	0.063463	0.953157	0.617366
ENSG00000206077.14	ZDHHC11B	0.565589	0.00592543	0.904943	0.421153	2.0865	0.000231433
ENSG00000206105.2	KRTAP20-4	0.337711	0.0353669	0.498124	0.105928	0.476079	0.0860473
ENSG00000206535.8	LNP1	0.554004	2.03574e-05	0.723483	0.00173165	0.855924	0.0163652
ENSG00000206538.9	VGLL3	1.98879	0.00268572	1.26201	0.0340758	1.17796	0.0868824
ENSG00000206567.10	ENSG00000206567	0.57	0.00637257	0.72	0.0919035	0.756	0.185674
ENSG00000206573.10	THUMPD3-AS1	0.563326	0.0003607	0.960661	0.611237	0.630171	0.000603541
ENSG00000206579.9	XKR4	2.4772	2.4168e-05	1.88906	0.015899	0.81155	0.0243232
ENSG00000211772.11	TRBC2	0.140308	0.0002035	0.126375	0.000193739	1.19628	0.208665
ENSG00000211950.2	IGHV1-24	2.11012	0.00211996	1.15179	0.576081	0.669643	0.0177678
ENSG00000212724.3	KRTAP2-3	3.40229	0.000165107	1.13858	0.39551	1.6989	0.0538771
ENSG00000213015.9	ZNF580	0.599913	7.32747e-05	0.620264	0.00016782	0.794055	0.00391405
ENSG00000213030.6	CGB8	8.06836	1.21565e-06	1.50781	0.150364	0.691406	0.378688
ENSG00000213088.12	ACKR1	0.591045	0.00140375	1.18109	0.0680887	0.802985	0.0254219
ENSG00000213144.2	ENSG00000213144	2.26143	0.00463591	1.63762	0.0707193	0.875755	0.714941
ENSG00000213190.4	MLLT11	1.6575	3.29659e-05	1.24291	0.000466681	0.523306	4.03401e-06
ENSG00000213347.11	MXD3	0.582219	9.62017e-05	0.833926	0.0079348	0.939451	0.174448
ENSG00000213412.3	HNRNPA1P33	1.5075	0.00231436	1.18406	0.00395389	0.955217	0.436282
ENSG00000213420.8	GPC2	0.554221	0.00014619	0.745533	0.00139965	1.23783	0.0157536
ENSG00000213626.13	LBH	0.632645	0.000143245	0.967602	0.611873	1.08734	0.220309
ENSG00000213853.10	EMP2	0.648109	0.00144144	0.888351	0.139978	0.917297	0.376211
ENSG00000213859.8	KCTD11	1.58593	7.85109e-06	1.03488	0.503207	0.921811	0.108651
ENSG00000213888.3	LINC01521	0.472615	8.67535e-06	0.666207	0.00101362	1.0031	0.951025
ENSG00000213930.12	GALT	0.62153	0.000629359	0.997915	0.981458	1.035	0.623144
ENSG00000213931.7	HBE1	0.64336	0.0313777	1.25402	0.135984	0.226861	0.00064016
ENSG00000213999.17	MEF2B	0.586031	0.00060312	0.734923	0.2241	0.603407	0.00924019
ENSG00000214049.8	UCA1	3.02165	1.22228e-06	1.48306	0.0158939	1.04275	0.598184
ENSG00000214107.9	MAGEB1	7.86327	2.40848e-06	10.9224	1.55387e-09	0.861224	0.0869503
ENSG00000214174.9	AMZ2P1	0.547096	9.19855e-06	0.802738	0.0197577	0.837647	0.19132
ENSG00000214184.3	GCC2-AS1	0.562395	0.00918173	0.817032	0.2651	0.844013	0.291918
ENSG00000214194.9	SMIM30	1.78971	4.19606e-06	1.3719	1.29709e-05	0.593388	1.2806e-06
ENSG00000214309.5	MBLAC1	0.613317	0.000793063	0.716088	0.0267103	1.30583	0.00626452
ENSG00000214514.8	KRT42P	0.64486	0.00194941	0.815421	0.0974568	1.34229	0.162646
ENSG00000214530.10	STARD10	1.70983	9.23046e-06	1.41314	0.000632672	0.940768	0.625651
ENSG00000214776.12	ENSG00000214776	0.653918	0.000499143	0.828358	0.0301604	0.969216	0.696044
ENSG00000214783.9	POLR2J4	0.661853	0.0105525	0.694344	0.0277802	0.886282	0.261538
ENSG00000214796.9	TUBA5P	0.588066	0.00312455	0.935802	0.534184	1.18436	0.193464
ENSG00000214866.9	DCDC2C	4.80107	0.000378757	1.03338	0.872714	0.632844	0.068897
ENSG00000214944.10	ARHGEF28	2.01873	1.25063e-05	1.12829	0.183955	1.06514	0.457683
ENSG00000214967.5	NPIPA7	0.50532	0.00640716	0.735462	0.278875	1.00742	0.968032
ENSG00000215039.8	CD27-AS1	0.407696	9.31058e-05	0.440458	0.000318995	0.724129	0.00597513
ENSG00000215193.14	PEX26	1.61416	0.00214095	1.24683	0.00957998	1.05603	0.623951
ENSG00000215269.6	GAGE12G	7.10395	9.43853e-05	3.59883	0.000213999	0.585652	0.114091
ENSG00000215386.14	MIR99AHG	0.541389	0.00928873	0.826832	0.246365	0.72883	0.0726463
ENSG00000215769.8	ARHGAP27P1-BPTFP1-KPNA2P3	1.81394	0.000188576	1.29567	0.0168141	1.20568	0.0561478
ENSG00000215790.8	SLC35E2A	0.657824	0.0241773	0.641611	0.02931	0.767133	0.126433
ENSG00000216649.5	GAGE12E	1.61849	0.0175558	0.512182	0.0287656	0.267996	0.000222749
ENSG00000216775.4	ENSG00000216775	0.5714	1.28878e-06	0.8958	0.0336005	1.1212	0.0466973
ENSG00000217416.4	ISCA1P1	1.70172	0.0387534	0.973534	0.799134	1.49142	0.186675
[truncated: 531 more rows]
