# Supplementary material for: Functional Characterization of Circadian Nuclear Receptors REV-ERBα and REV-ERBβ in Human Osteosarcoma Cell Cultures
Source: Preprints.org preprint supplement (doi:10.20944/preprints202312.0438.v1), 2023-12-07
Supplement: Supplementary file 2 [file Table S2.xlsx]

## Sheet: Table S2
Table S2. Gene enrichment analyses of the NR1D1/2 double mutant (NDKO) DEGs related to Figure 2
Identifier	Term	Ratio	P-value	DEGs
KEGG pathway (Upregulated)	TNF signaling pathway	22/112	5.41493e-08	MAP2K3, EDN1, CSF2, MLKL, CCL20, MMP3, PIK3CD, TNFAIP3, VEGFC, TRAF1, MMP9, NFKB1, ICAM1, MMP14, TRAF3, IRF1, BCL3, CCL2, FAS, JUNB, MAP3K14, BIRC3
	NF-kappa B signaling pathway	19/104	1.38429e-06	CXCL8, GADD45A, DDX58, LY96, TNFAIP3, TRAF1, NFKB1, ICAM1, NFKB2, RELB, CYLD, PLAU, TRAF3, CCL4, TRIM25, LTB, MAP3K14, CARD11, BIRC3
	Epstein-Barr virus infection	25/202	4.67434e-05	CDKN1A, PIK3CD, TNFAIP3, ICAM1, RELB, MYC, PSMD3, IKBKE, MAP2K3, GADD45A, DDX58, ADRM1, TAP1, NFKB1, HLA-E, NFKB2, TAPBP, OAS1, TRAF3, OAS3, HLA-DPB1, FAS, NFKBIE, MAP3K14, CD44
	Rheumatoid arthritis	14/93	0.000287891	ATP6V0B, CSF2, CXCL8, ATP6V0E1, CCL20, CCL3L3, MMP3, ICAM1, CTSL, CCL3, HLA-DPB1, CCL2, LTB, ATP6V0D1
	Lipid and atherosclerosis	24/215	0.000323908	MAP2K3, CXCL8, NCF2, NOS3, CCL3L3, MMP3, LY96, TNFRSF10B, PIK3CD, SOD2, MMP9, VAV1, NFKB1, ICAM1, TRAF3, DDIT3, CYP1A1, CCL3, OLR1, FAS, NLRP3, CCL2, TLR6, IKBKE
	NOD-like receptor signaling pathway	21/181	0.000446571	DEFB103A, GABARAPL1, CXCL8, CARD6, TNFAIP3, NFKB1, PANX1, TRPM2, OAS1, IFI16, STING1, TRAF3, OAS3, CASP4, NLRP3, CCL2, NLRP1, GBP2, IKBKE, BIRC3, GBP3
	Fluid shear stress and atherosclerosis	17/139	0.000834626	MEF2C, EDN1, SDC4, NCF2, DUSP1, NOS3, MGST3, PIK3CD, PLAT, MMP9, NFKB1, ICAM1, CTSL, RAC2, HMOX1, CCL2, SQSTM1
	Small cell lung cancer	13/92	0.000868519	CDKN1A, CDKN2B, GADD45A, PIK3CD, LAMC2, TRAF1, NFKB1, TRAF3, MYC, COL4A4, CKS2, BIRC7, BIRC3
	Glycosaminoglycan biosynthesis	9/53	0.00143807	NDST2, B4GALT1, CHPF, CHST11, CHPF2, B3GAT3, UST, CHST15, B4GALT4
	AGE-RAGE signaling pathway in diabetic complications	13/100	0.00189335	STAT5A, EDN1, CXCL8, NOS3, PRKCE, PIK3CD, VEGFC, F3, NFKB1, ICAM1, COL4A4, CCL2, PLCD3
KEGG pathway (Downregulated)	Alcoholism	37/186	3.47398e-08	H2AX, MAOB, HDAC8, GNAI1, H2AC18, GNAI2, H2AC13, H3C15, H2BC21, GNG7, CREB3L2, H3C1, H3C10, H4C1, DRD1, H3C2, PRKACB, H3C4, H4C5, H4C8, H2AZ2, H2BC7, H2AC6, H2BC5, H2AC7, H2BC4, H4-16, GNG11, H2BC12, H2AJ, H4C15, H4C14, H2AC20, PPP1R1B, H2BC11, RAF1, SOS2
	Axon guidance	34/182	5.8229e-07	EPHB6, NRP1, ROCK1, SEMA3C, SEMA3A, SEMA3B, SEMA3G, SEMA3E, SEMA3F, GNAI1, ROBO1, GNAI2, NTN3, EFNB3, DPYSL5, DPYSL2, BOC, RAC3, LRRC4C, EPHB4, EPHB3, EPHA5, SEMA6B, EPHA4, PTCH1, WNT5A, NFATC2, PRKCA, L1CAM, RHOA, RGMA, EFNA2, RAF1, NGEF
	Systemic lupus erythematosus	28/135	6.44327e-07	H2AX, C1R, H2AC18, C4A, H2AC13, H3C15, SNRPD1, H2BC21, H3C1, H3C10, H4C1, H3C2, H3C4, H4C5, H4C8, H2AZ2, H2BC7, H2AC6, H2BC5, H2AC7, H2BC4, H4-16, H2BC12, H2AJ, H4C15, H4C14, H2AC20, H2BC11
	Neutrophil extracellular trap formation	31/189	2.78929e-05	H2AX, ITGB2, HDAC8, H2AC18, H2AC13, H3C15, H2BC21, H3C1, H3C10, H4C1, H3C2, H3C4, H4C5, H4C8, H2AZ2, H2BC7, H2AC6, H2BC5, H2AC7, H2BC4, H4-16, PRKCA, H2BC12, H2AJ, H4C15, H4C14, H2AC20, H2BC11, RAF1, PLCB2, TLR4
	TGF-beta signaling pathway	19/94	5.69311e-05	TGIF1, LEFTY1, ROCK1, INHBA, SMAD6, LTBP1, THBS1, ACVR2B, RHOA, BMP6, RGMA, TGFBR2, BMP5, BMP4, RPS6KB1, ID1, ID4, ID3, PITX2
	PI3K-Akt signaling pathway	47/354	8.73349e-05	LAMA5, CDKN1B, IRS1, ITGB4, FLT4, LAMA4, PDGFB, TNC, AREG, FGF2, THBS1, NTF4, ERBB3, GNG7, CREB3L2, PDGFC, ITGB8, PCK2, FGF21, PDGFRB, NGFR, PDGFRA, IGF2, FLT3LG, PRKCA, LAMB1, PPP2R3B, GNG11, PGF, COL1A1, KITLG, CDK6, EFNA2, CCNE2, RPS6KB1, DDIT4, COL6A1, IL2RB, COL6A3, ITGA7, COL9A3, COL9A2, SGK1, RAF1, TLR4, SOS2, FGFR2
	Wnt signaling pathway	27/166	0.000103382	LEF1, PRICKLE2, PRICKLE1, CXXC4, NKD1, PRICKLE4, SOX17, RAC3, GPC4, PRKACB, FZD1, RNF43, TLE2, TCF7L1, FZD2, SERPINF1, WNT5A, NFATC2, PRKCA, AXIN2, TLE6, RHOA, SFRP1, CTNNB1, ROR1, PLCB2, LGR4
	Hippo signaling pathway	26/163	0.000190253	ITGB2, LEF1, AREG, NKD1, GLI2, SOX2, RASSF2, RASSF4, CCN2, FZD1, TCF7L1, FZD2, WNT5A, AXIN2, BMP6, BMP5, TGFBR2, BMP4, DLG3, DCHS2, DLG4, ID1, CTNNB1, FAT4, PALS1, TP73
	Human papillomavirus infection	42/331	0.000529822	NOTCH3, LAMA5, CDKN1B, NOTCH1, MAML2, ITGB4, NOTCH4, LAMA4, TNC, THBS1, CREB3L2, E2F1, ITGB8, HES1, PRKACB, FZD1, PDGFRB, HES6, TCF7L1, FZD2, JAG1, WNT5A, LAMB1, PPP2R3B, AXIN2, COL1A1, CCNA2, CDK6, CCNE2, DLG3, RPS6KB1, TADA3, COL6A1, CTNNB1, COL6A3, ITGA7, COL9A3, MAML3, COL9A2, RAF1, SOS2, PALS1
	Breast cancer	23/147	0.000574647	FZD1, NOTCH3, TCF7L1, NOTCH1, FZD2, JAG1, NOTCH4, FLT4, WNT5A, LEF1, AXIN2, FOS, BRCA2, FGF2, CDK6, RPS6KB1, E2F1, E2F2, CTNNB1, HES1, RAF1, SOS2, FGF21
GO_BP (Upregulated)	Positive Regulation Of Apoptotic Signaling Pathway (GO:2001235)	13/62	1.35211e-05	PLEKHF1, TNFRSF12A, G0S2, TPD52L1, PML, BBC3, CYLD, CTSL, DDIT3, PMAIP1, FAS, LTB, TLR6
	Regulation Of I-kappaB kinase/NF-kappaB Signaling (GO:0043122)	28/232	2.67579e-05	TNFAIP3, RFPL4A, ZC3H12A, TRIM25, HMOX1, IKBKE, TRIM22, APOL2, NDFIP2, RIOK3, PLK2, F2R, TNFRSF10B, TRAF1, RHOC, PINK1, TNIP1, TRAF3, CARD19, S100A4, TLR6, LTB, RFPL4AL1, SQSTM1, MAP3K14, OPTN, CARD11, BIRC3
	Defense Response To Symbiont (GO:0140546)	20/148	7.6922e-05	MLKL, NCBP1, IFIT3, OASL, IFIH1, ZNFX1, OAS1, IFI16, STING1, TRAF3, NDUFAF4, IRF1, OAS3, PMAIP1, NLRP1, SERINC3, GBP2, MAP3K14, IKBKE, SERINC5
	Regulation Of Extrinsic Apoptotic Signaling Pathway Via Death Domain Receptors (GO:1902041)	8/31	0.000134124	SP100, NOS3, TMBIM1, TNFAIP3, HMOX1, PMAIP1, STX4, ICAM1
	Cellular Response To Mechanical Stimulus (GO:0071260)	10/48	0.00014061	GADD45A, IRF1, PDE2A, HABP4, PIEZO1, TNFRSF10B, FAS, MAP3K14, NFKB1, AQP1
	Positive Regulation Of Release Of Cytochrome C From Mitochondria (GO:0090200)	7/25	0.000203287	MLLT11, PINK1, BIK, PPIF, PMAIP1, MMP9, BBC3
	Peptidyl-Tyrosine Dephosphorylation Involved In Inactivation Of Protein Kinase Activity (GO:1990264)	4/7	0.000218406	PTPN1, PTPRR, DUSP10, DUSP3
	Defense Response To Virus (GO:0051607)	22/189	0.000315408	MLKL, NCBP1, IFIT3, PML, OASL, IFIH1, ZNFX1, OAS1, IFI16, STING1, TRAF3, NDUFAF4, IRF1, OAS3, TRIM25, PMAIP1, NLRP1, SERINC3, GBP2, MAP3K14, IKBKE, SERINC5
	Regulation Of Defense Response (GO:0031347)	14/97	0.000448353	SEMA7A, CYLD, TRAF3, IRF1, ALOX5, CASP4, NLRP2, APOE, NLRP1, DAGLB, PIK3AP1, MGLL, PTGES, BIRC3
	Negative Regulation Of Smooth Muscle Cell Proliferation (GO:0048662)	8/37	0.000498404	CNN1, CDKN1A, NDRG4, MEF2C, TNFAIP3, HMOX1, APOE, SOD2
GO_BP (Downregulated)	Regulation Of Cell Migration (GO:0030334)	68/434	4.35873e-09	SERPINE2, FLT4, TNC, KIF14, ARID4A, LDLRAD4, FGF2, SYNE2, CX3CL1, ARHGAP4, ROBO1, ING2, MDK, DAG1, EMILIN1, ARPIN, SEMA6B, PDGFRB, EPHA4, PDGFRA, SUN2, IGFBP5, LIMCH1, TPM1, TET1, PRKCA, KRT5, RHOA, CCNA2, SFRP1, TMSB15A, CDH11, SGK1, LRRC15, GRB7, NOTCH1, ROCK1, SEMA3C, SEMA3B, LEF1, PDGFB, SEMA3G, TWIST2, SEMA3E, SEMA3F, THBS1, NKD1, PDGFC, ZNF703, MGAT3, HAS2, PTK2B, DRD1, SCAI, FGF21, NGFR, C…
	Negative Regulation Of Wnt Signaling Pathway (GO:0030178)	30/140	1.22057e-07	AMER1, GPI, CITED1, JADE1, TMEM131L, PRICKLE1, CXXC4, GLI3, NKD1, SOX2, HMGXB4, SOX17, MDK, SOSTDC1, SOX9, IGFBP6, DACT1, RNF43, TLE2, IGFBP4, WNT5A, SOX13, KREMEN1, DAB2IP, FUZ, AXIN2, TLE6, BICC1, SFRP1, MDFI
	Neuron Projection Guidance (GO:0097485)	27/124	3.66418e-07	EPHB6, NOTCH3, NOTCH1, SEMA3C, SEMA3A, SEMA3B, NRXN3, SEMA3G, SEMA3E, SEMA3F, IGSF9, GLI2, NTN3, EFNB3, DPYSL5, BOC, PLEKHG4B, DAG1, EPHB3, EPHA5, SEMA6B, EPHA4, WNT5A, L1CAM, NELL2, EFNA2, CNTN1
	Axon Guidance (GO:0007411)	30/149	5.09497e-07	EPHB6, NOTCH3, NOTCH1, SEMA3C, SEMA3A, SEMA3B, NRXN3, SEMA3G, SEMA3E, SEMA3F, IGSF9, GLI2, NTN3, EFNB3, DPYSL5, BOC, CHN1, PLEKHG4B, DAG1, RAC3, NCAM1, EPHB3, EPHA5, SEMA6B, EPHA4, WNT5A, L1CAM, NELL2, EFNA2, CNTN1
	Negative Regulation Of Cell Differentiation (GO:0045596)	37/207	5.89655e-07	NOTCH1, CITED1, NOTCH4, TWIST2, DTX1, LDLRAD4, ZFP36L2, SOX2, EFEMP1, E2F1, SOSTDC1, PTK2B, SOX8, PRAME, HES1, SOX9, ANKRD2, EPHA4, SMARCC1, JAG1, ADGRV1, PTCH1, WNT5A, IGF2, DAB2IP, SMAD6, SMARCA2, TBX3, SMARCA4, BMP5, BMP4, SFRP1, CDK6, COL5A2, SPRY2, TRIB2, FERMT2
	Positive Regulation Of Cell Motility (GO:2000147)	38/221	1.13279e-06	GRB7, LRRC15, NOTCH1, SEMA3C, CCDC25, FLT4, LEF1, SEMA3B, PDGFB, TWIST2, SEMA3G, SEMA3E, SEMA3F, THBS1, SYNE2, MDK, PDGFC, ZNF703, HAS2, PTK2B, DRD1, PDGFRB, SEMA6B, EPHA4, CCL24, PDGFRA, SUN2, ARHGEF39, PRKCA, ELP3, LAMB1, COL1A1, CCNA2, TMSB15A, SNAI1, CNTN1, SPRY2, FERMT2
	Regulation Of Cell Population Proliferation (GO:0042127)	94/766	1.19402e-06	COL18A1, RARG, CDKN1B, IRS1, CDCA7L, FLT4, RTKN2, KIF14, HMGB2, ASH2L, FOXM1, AREG, CLU, FGF2, CX3CL1, HMGN5, SIX4, EMILIN1, SOX9, TNS2, RBM5, PDGFRB, EPHA4, PDGFRA, SMARCC1, TSC22D1, H2AC6, IL11RA, CEP131, FLT3LG, EMP2, P3H3, CCDC117, AXIN2, PGF, RHOA, TGFBR2, KAT2B, SFRP1, SAPCD2, ADGRB1, TIMELESS, SGK1, RAF1, KANK2, PTGFR, CTF1, NOTCH1, UHRF1, PDGFB, PTN, THBS1, GNAI2, ADGRG1, ERBB3, PDGFC, ZN…
	Negative Regulation Of Multicellular Organismal Process (GO:0051241)	39/231	1.31948e-06	NOTCH1, LAMA4, WWC2, ARID4A, LDLRAD4, BRCA2, ROBO1, GJA1, ING2, MDK, WWC3, SOSTDC1, EMILIN1, SPX, SOX9, HOXA7, MAP2K6, SRGN, EPHA4, PTCH1, DAB2IP, TET1, NR1D1, KREMEN2, SMAD6, ACVR2B, ELAPOR2, BMP5, BMP4, SFRP1, TWSG1, RGCC, TNNT1, NOVA1, NOVA2, ID1, SPRY2, TLR4, LGR4
	Aortic Valve Morphogenesis (GO:0003180)	13/37	1.40364e-06	NOTCH1, JAG1, ROCK1, AXIN2, SMAD6, RHOA, ROBO1, TGFBR2, BMP4, CDH11, SNAI1, EMILIN1, SOX9
	Positive Regulation Of Cell Migration (GO:0030335)	43/272	2.34839e-06	GRB7, LRRC15, NOTCH1, SEMA3C, FLT4, SEMA3A, LEF1, SEMA3B, PDGFB, TWIST2, SEMA3G, SEMA3E, SEMA3F, THBS1, SYNE2, GLIPR2, MDK, PDGFC, ZNF703, HAS2, PTK2B, SOX9, DRD1, CLASP2, PDGFRB, SEMA6B, EPHA4, CCL24, PDGFRA, SUN2, DMTN, ARHGEF39, DAB2IP, PRKCA, ELP3, LAMB1, COL1A1, CCNA2, TMSB15A, SNAI1, CNTN1, SPRY2, FERMT2
