# Supplementary material for: Functional Characterization of Circadian Nuclear Receptors REV-ERBα and REV-ERBβ in Human Osteosarcoma Cell Cultures
Source: Preprints.org preprint supplement (doi:10.20944/preprints202312.0438.v1), 2023-12-07
Supplement: Supplementary file 3 [file Table S3.xlsx]

## Sheet: Table S2
Table S3. Gene enrichment analyses of the REV-ERBα-regulated DEGs related to Figure 4
Identifier	Term	Ratio	P-value	DEGs
KEGG pathway (Upregulated)	NF-kappa B signaling pathway	8/104	1.45384e-05	CXCL8, PLAU, CCL4, TNFAIP3, TRAF1, MAP3K14, BIRC3, RELB
	TNF signaling pathway	8/112	2.49748e-05	CSF2, CCL20, PIK3CD, TNFAIP3, TRAF1, MAP3K14, MMP9, BIRC3
	Rheumatoid arthritis	7/93	5.78896e-05	CSF2, CXCL8, CTSL, CCL20, CCL3L3, CCL3, HLA-DPB1
	Proteoglycans in cancer	9/205	0.000339109	WNT10A, SDC4, CTSL, PLAU, LUM, PIK3CD, EZR, MMP9, VAV1
	Basal transcription factors	4/45	0.00127863	CDK7, GTF2H2C, CCNH, TAF9
	Leukocyte transendothelial migration	6/114	0.00133072	ITGA4, NCF2, PIK3CD, EZR, MMP9, VAV1
	IL-17 signaling pathway	5/94	0.00320027	CSF2, CXCL8, CCL20, TNFAIP3, MMP9
	Apoptosis	6/142	0.00400675	CTSL, PIK3CD, TRAF1, MAP3K14, TUBA4A, BIRC3
	Viral protein interaction with cytokine and cytokine receptor	5/100	0.00417264	CXCL8, CCL20, CCL3L3, CCL4, CCL3
	Galactose metabolism	3/31	0.00418549	B4GALT1, HKDC1, GALM
KEGG pathway (Downregulated)	Systemic lupus erythematosus	13/135	1.2318e-07	H2AC6, H2BC5, H2AC7, C1R, H4-16, H2AC18, C4A, H3C15, H4C14, H2BC21, H3C1, H3C2, H3C4
	Alcoholism	14/186	8.4817e-07	H2AC6, H2BC5, H2AC7, H4-16, GNG11, GNAI1, H2AC18, H3C15, H4C14, H2BC21, H3C1, H3C2, PRKACB, H3C4
	Axon guidance	12/182	1.9864e-05	EPHA5, EPHA4, NRP1, SEMA3C, PTCH1, SEMA3A, BOC, NFATC2, LRRC4C, EPHB4, GNAI1, NTN3
	PI3K-Akt signaling pathway	17/354	2.63078e-05	LAMA4, PDGFB, IGF2, LAMB1, PPP2R3B, GNG11, AREG, FGF2, PGF, KITLG, CDK6, CCNE2, ERBB3, PDGFC, IL2RB, COL9A3, TLR4
	Neutrophil extracellular trap formation	12/189	2.88813e-05	H3C15, H2AC6, H2BC5, H2AC7, H4C14, H2BC21, H3C1, H4-16, H3C2, H3C4, TLR4, H2AC18
	MAPK signaling pathway	13/294	0.000513169	PDGFB, IGF2, AREG, FGF2, PGF, CACNA1G, CACNG6, KITLG, ERBB3, PDGFC, TAB1, PRKACB, MAP2K6
	Pathways in cancer	18/531	0.00112719	JAG1, HHIP, PTCH1, LAMA4, PDGFB, IGF2, LAMB1, GNG11, FGF2, GLI3, GNAI1, PGF, KITLG, CDK6, CCNE2, IL2RB, E2F2, PRKACB
	Hedgehog signaling pathway	5/56	0.00147924	HHIP, PTCH1, BOC, PRKACB, GLI3
	Toxoplasmosis	7/112	0.00147995	SOCS1, LAMA4, LAMB1, TAB1, TLR4, GNAI1, MAP2K6
	Gap junction	6/88	0.00206273	TUBA3E, TUBA3D, PDGFC, PDGFB, PRKACB, GNAI1
TRRUST TFs (Upregulated)	RELA human	16/301	1.37318e-07	CSF2;CXCL8;CCL20;TNFRSF9;TNFAIP3;TRAF1;F3;MMP9;SLC25A27;PLAU;CCL4;NLRP2;CCL3;SAA2;IER3;BIRC3
	NFKB1 human	15/303	8.42511e-07	CSF2;CXCL8;CCL20;TNFRSF9;TNFAIP3;TRAF1;F3;MMP9;SLC25A27;PLAU;CCL4;NLRP2;CCL3;IER3;BIRC3
	JUN human	9/149	2.97504e-05	CSF2;CXCL8;PLAU;VDR;CTSL;EZR;MMP9;F3;RELB
	POU2F1 human	5/38	4.71217e-05	SDC4;CAPN6;PLAU;TXNRD1;SNAI2
	REL human	4/22	7.58715e-05	TNFAIP3;F3;BIRC3;IER3
	EZH2 human	4/40	0.000817161	CDKN2B;ADAMTS1;VDR;SNAI2
	NFKBIA human	45004	0.000990185	CXCL8;TRAF1;MMP9
	IKBKB human	2/6	0.0016159	CXCL8;MMP9
	EP300 human	4/56	0.00288036	CDKN2B;CXCL8;S100A4;MMP9
	FOS human	4/57	0.00307252	CXCL8;PLAU;EZR;MMP9
