# Supplementary material for: Functional Characterization of Circadian Nuclear Receptors REV-ERBα and REV-ERBβ in Human Osteosarcoma Cell Cultures
Source: Preprints.org preprint supplement (doi:10.20944/preprints202312.0438.v1), 2023-12-07
Supplement: Supplementary file 4 [file Table S4.xlsx]

## Sheet: Table S4
Table S4. Gene enrichment analyses of the REV-ERBβ-regulated DEGs related to Figure 5
Identifier	Term	Ratio	P-value	DEGs
GO_CC (Downregulated)	Collagen-Containing Extracellular Matrix (GO:0062023)	14/373	3.32796e-09	COL18A1, LRRC15, TNC, L1CAM, LTBP1, HAPLN1, COL1A1, SMOC1, COL5A2, COL6A1, SERPINH1, COL6A3, CRELD1, MATN3
	Endoplasmic Reticulum Lumen (GO:0005788)	10/284	1.20602e-06	COL1A1, COL18A1, POGLUT2, COL5A2, COL6A1, TNC, SERPINH1, COL6A3, LTBP1, MATN3
	Perisynaptic Extracellular Matrix (GO:0098966)	2/9	0.000819717	TNC, HAPLN1
	Intracellular Organelle Lumen (GO:0070013)	12/856	0.000881524	COL1A1, COL18A1, POGLUT2, BTD, COL5A2, COL6A1, TNC, SERPINH1, COL6A3, LTBP1, MATN3, PCK2
	Axon (GO:0030424)	4/205	0.0177247	NELL2, KCNC1, L1CAM, CD200
	Neuron Projection (GO:0043005)	7/557	0.018686	KISS1, NELL2, SLC6A6, KCNC1, L1CAM, RGS9, CD200
	Basement Membrane (GO:0005604)	2/46	0.0209799	SMOC1, TNC
