# Supplementary material for: Functional Characterization of Circadian Nuclear Receptors REV-ERBα and REV-ERBβ in Human Osteosarcoma Cell Cultures
Source: Preprints.org preprint supplement (doi:10.20944/preprints202312.0438.v1), 2023-12-07
Supplement: Supplementary file 5 [file Table S5.xlsx]

## Sheet: Table S5
Table S5. Primer sequences used for RT-qPCR
Gene		Sequence (5’→3’)
TBP	Forward	ACG CCG AAT ATA ATC CCA AG
	Reverse	CTT CAC TCT TGG CTC CTG TG
NR1D1 (del)	Forward	CTC CAT CGT CCG CAT CAA TC
	Reverse	GCC CAC AGA GAG ACA CTT CT
NR1D1 (5’)	Forward	AAG GCT GTC CCA CCT ACT TC
	Reverse	GAA GGA GGA GGA GGA TGA CG
NR1D2 (del)	Forward	GAT GTC AGC AAT GTC GCT TC
	Reverse	CAC GCT TAG GAA TAC GAC CA
NR1D2 (3’)	Forward	GTG GTG GAA TTT GCA AAG CG
	Reverse	CCC TGC TCC CAT TGA GTG TA
BMAL1	Forward	AAG GAT GGC TGT TCA GCA CAT GA
	Reverse	CAA AAA TCC ATC TGC TGC CCT G
NPAS2	Forward	CAG CAC CTG CTC AGA GAA TC
	Reverse	GCT CTG CAT TAG CTG TGA GC
CLOCK	Forward	TTC TAG ATC ACA GGG CAC CA
	Reverse	ATT TGC CTT TCC CAT ATT GC
PER2	Forward	GCA TCC ATA TTT CAC TGT AAA AGA
	Reverse	AGT AAA AGA ATC TGC TCC ACT G
CRY1	Forward	GCA GTG GAA GTT GCT CTC AA
	Reverse	TCC TTG CTT CAA CAG GTG AG
CRY2	Forward	GCT GCG TTT ACA TTC TCG AC
	Reverse	GTA GGA ACC TCC ATC GGT TG
